# Supplementary material
Source: publisher site journal article supplement (https://en-cdn.bio-protocol.org/attached/file/20191112/Supplementary%20Data%201.xlsx)
Supplement: Supplementary file 1 [file Supplementary%20Data%201.xlsx]

## Sheet: DEG lists
Supplementary Data 1. Lists of differentially expressed genes (DEGs) and the associated over- and under-represented Biological Processes: Lists of DEGs identified in Blair et al. (2019).
WT		mutant			all DEGs (4,469)
up (1,771)	down (1,598)	up (1,649)	down (1,580)
AT1G01140	AT1G01060	AT1G01140	AT1G01180		AT1G01140
AT1G01240	AT1G01180	AT1G01240	AT1G01250		AT1G01240
AT1G01360	AT1G01300	AT1G01310	AT1G01300		AT1G01360
AT1G01470	AT1G01320	AT1G01360	AT1G01420		AT1G01470
AT1G01720	AT1G01390	AT1G01715	AT1G01620		AT1G01720
AT1G01830	AT1G01420	AT1G01720	AT1G01630		AT1G01830
AT1G01940	AT1G01580	AT1G01830	AT1G01750		AT1G01940
AT1G02000	AT1G01790	AT1G01930	AT1G02360		AT1G02000
AT1G02090	AT1G02010	AT1G01940	AT1G02730		AT1G02090
AT1G02290	AT1G02360	AT1G02000	AT1G02810		AT1G02290
AT1G02310	AT1G02500	AT1G02090	AT1G03110		AT1G02310
AT1G02340	AT1G02730	AT1G02180	AT1G03410		AT1G02340
AT1G02390	AT1G02820	AT1G02290	AT1G03420		AT1G02390
AT1G02660	AT1G03110	AT1G02310	AT1G03560		AT1G02660
AT1G02700	AT1G03410	AT1G02340	AT1G03780		AT1G02700
AT1G02816	AT1G03420	AT1G02380	AT1G03870		AT1G02816
AT1G02860	AT1G03510	AT1G02390	AT1G04020		AT1G02860
AT1G02980	AT1G03540	AT1G02460	AT1G04183		AT1G02980
AT1G03070	AT1G03740	AT1G02660	AT1G04410		AT1G03070
AT1G03140	AT1G03820	AT1G02700	AT1G04430		AT1G03140
AT1G03630	AT1G03870	AT1G02860	AT1G04463		AT1G03630
AT1G03860	AT1G03930	AT1G02890	AT1G04503		AT1G03860
AT1G03970	AT1G04020	AT1G02980	AT1G04520		AT1G03970
AT1G04103	AT1G04110	AT1G03070	AT1G04635		AT1G04103
AT1G04130	AT1G04183	AT1G03180	AT1G04640		AT1G04130
AT1G04220	AT1G04430	AT1G03470	AT1G04680		AT1G04220
AT1G04233	AT1G04433	AT1G03610	AT1G04800		AT1G04233
AT1G04247	AT1G04503	AT1G03630	AT1G04870		AT1G04247
AT1G04560	AT1G04520	AT1G03860	AT1G05320		AT1G04560
AT1G04570	AT1G04680	AT1G04103	AT1G05660		AT1G04570
AT1G04737	AT1G04790	AT1G04130	AT1G05835		AT1G04737
AT1G04980	AT1G04800	AT1G04180	AT1G06000		AT1G04980
AT1G05017	AT1G05213	AT1G04220	AT1G06002		AT1G05017
AT1G05100	AT1G05253	AT1G04247	AT1G06090		AT1G05100
AT1G05340	AT1G05320	AT1G04555	AT1G06360		AT1G05340
AT1G05347	AT1G05470	AT1G04980	AT1G06450		AT1G05347
AT1G05353	AT1G05835	AT1G05017	AT1G06463		AT1G05353
AT1G05385	AT1G05950	AT1G05100	AT1G06530		AT1G05385
AT1G05523	AT1G06000	AT1G05203	AT1G06540		AT1G05523
AT1G06030	AT1G06002	AT1G05340	AT1G06760		AT1G06030
AT1G06070	AT1G06150	AT1G05343	AT1G07240		AT1G06070
AT1G06337	AT1G06360	AT1G05347	AT1G07477		AT1G06337
AT1G07150	AT1G06410	AT1G05353	AT1G07650		AT1G07150
AT1G07330	AT1G06670	AT1G05777	AT1G07660		AT1G07330
AT1G07350	AT1G06680	AT1G06030	AT1G07750		AT1G07350
AT1G07373	AT1G06690	AT1G06337	AT1G07780		AT1G07373
AT1G07400	AT1G06760	AT1G07150	AT1G07820		AT1G07400
AT1G07410	AT1G07070	AT1G07200	AT1G07893		AT1G07410
AT1G07420	AT1G07090	AT1G07330	AT1G07920		AT1G07420
AT1G07430	AT1G07110	AT1G07350	AT1G08280		AT1G07430
AT1G07500	AT1G07390	AT1G07400	AT1G08380		AT1G07500
AT1G07510	AT1G07477	AT1G07410	AT1G08580		AT1G07510
AT1G07530	AT1G07650	AT1G07420	AT1G09050		AT1G07530
AT1G07645	AT1G07893	AT1G07430	AT1G09200		AT1G07645
AT1G07670	AT1G07940	AT1G07450	AT1G09310		AT1G07670
AT1G07870	AT1G08043	AT1G07460	AT1G09350		AT1G07870
AT1G07900	AT1G08130	AT1G07500	AT1G09645		AT1G07900
AT1G07985	AT1G08160	AT1G07510	AT1G09765		AT1G07985
AT1G08003	AT1G08280	AT1G07670	AT1G09780		AT1G08003
AT1G08460	AT1G08380	AT1G07890	AT1G09820		AT1G08460
AT1G08513	AT1G08797	AT1G08003	AT1G10290		AT1G08513
AT1G08550	AT1G09200	AT1G08290	AT1G10580		AT1G08550
AT1G08560	AT1G09390	AT1G08300	AT1G10682		AT1G08560
AT1G08650	AT1G09560	AT1G08460	AT1G10850		AT1G08650
AT1G08803	AT1G09750	AT1G08560	AT1G11050		AT1G08803
AT1G08910	AT1G09765	AT1G08570	AT1G11200		AT1G08910
AT1G08920	AT1G09780	AT1G08707	AT1G11210		AT1G08920
AT1G08935	AT1G09820	AT1G08910	AT1G11545		AT1G08935
AT1G08973	AT1G09840	AT1G08920	AT1G11580		AT1G08973
AT1G09070	AT1G10580	AT1G08973	AT1G11600		AT1G09070
AT1G09100	AT1G10640	AT1G09070	AT1G11670		AT1G09100
AT1G09140	AT1G10850	AT1G09100	AT1G11700		AT1G09140
AT1G09433	AT1G10900	AT1G09140	AT1G12020		AT1G09433
AT1G09715	AT1G10920	AT1G09160	AT1G12090		AT1G09715
AT1G09850	AT1G11120	AT1G09210	AT1G12310		AT1G09850
AT1G09950	AT1G11150	AT1G09433	AT1G12320		AT1G09950
AT1G09993	AT1G11440	AT1G09530	AT1G12500		AT1G09993
AT1G10050	AT1G11450	AT1G09710	AT1G12750		AT1G10050
AT1G10170	AT1G11580	AT1G09715	AT1G12850		AT1G10170
AT1G10230	AT1G11670	AT1G09950	AT1G12900		AT1G10230
AT1G10480	AT1G11700	AT1G10050	AT1G12950		AT1G10480
AT1G10960	AT1G11720	AT1G10150	AT1G13000		AT1G10960
AT1G10970	AT1G11850	AT1G10155	AT1G13110		AT1G10970
AT1G11000	AT1G11860	AT1G10170	AT1G13170		AT1G11000
AT1G11100	AT1G12000	AT1G10230	AT1G13210		AT1G11100
AT1G11265	AT1G12020	AT1G10740	AT1G13250		AT1G11265
AT1G11270	AT1G12090	AT1G10960	AT1G13420		AT1G11270
AT1G11400	AT1G12110	AT1G10970	AT1G13440		AT1G11400
AT1G11660	AT1G12240	AT1G11100	AT1G13510		AT1G11660
AT1G11960	AT1G12500	AT1G11265	AT1G13609		AT1G11960
AT1G12030	AT1G12550	AT1G11380	AT1G13650		AT1G12030
AT1G12060	AT1G12750	AT1G11400	AT1G13670		AT1G12060
AT1G12064	AT1G12850	AT1G11660	AT1G13730		AT1G12064
AT1G12420	AT1G12860	AT1G11960	AT1G13930		AT1G12420
AT1G12650	AT1G12900	AT1G12060	AT1G14185		AT1G12650
AT1G12710	AT1G13110	AT1G13080	AT1G14320		AT1G12710
AT1G13080	AT1G13170	AT1G13195	AT1G14540		AT1G13080
AT1G13195	AT1G13210	AT1G13340	AT1G14840		AT1G13195
AT1G13280	AT1G13250	AT1G13350	AT1G14920		AT1G13280
AT1G13340	AT1G13420	AT1G13450	AT1G15000		AT1G13340
AT1G13360	AT1G13440	AT1G13600	AT1G15002		AT1G13360
AT1G13600	AT1G13510	AT1G13640	AT1G15080		AT1G13600
AT1G13640	AT1G13560	AT1G13690	AT1G15260		AT1G13640
AT1G13690	AT1G13609	AT1G13790	AT1G15660		AT1G13690
AT1G13700	AT1G13650	AT1G13990	AT1G15690		AT1G13700
AT1G13990	AT1G14150	AT1G14200	AT1G15820		AT1G13990
AT1G14200	AT1G14185	AT1G14205	AT1G16090		AT1G14200
AT1G14205	AT1G14430	AT1G14360	AT1G16120		AT1G14205
AT1G14290	AT1G14460	AT1G14970	AT1G16400		AT1G14290
AT1G14360	AT1G14580	AT1G14980	AT1G16410		AT1G14360
AT1G14970	AT1G14840	AT1G15230	AT1G16489		AT1G14970
AT1G14980	AT1G14900	AT1G15410	AT1G16490		AT1G14980
AT1G15230	AT1G14920	AT1G15415	AT1G16916		AT1G15230
AT1G15330	AT1G15000	AT1G15550	AT1G17170		AT1G15330
AT1G15410	AT1G15002	AT1G15740	AT1G17180		AT1G15410
AT1G15415	AT1G15210	AT1G15970	AT1G17255		AT1G15415
AT1G15550	AT1G15260	AT1G15990	AT1G17830		AT1G15550
AT1G15860	AT1G15290	AT1G16022	AT1G18140		AT1G15860
AT1G15880	AT1G15310	AT1G16025	AT1G18150		AT1G15880
AT1G15970	AT1G15690	AT1G16030	AT1G18210		AT1G15970
AT1G16022	AT1G15820	AT1G16040	AT1G18265		AT1G16022
AT1G16025	AT1G15950	AT1G16840	AT1G18390		AT1G16025
AT1G16030	AT1G16300	AT1G17145	AT1G18540		AT1G16030
AT1G16040	AT1G16400	AT1G17460	AT1G18590		AT1G16040
AT1G16850	AT1G16410	AT1G17870	AT1G18710		AT1G16850
AT1G17080	AT1G16480	AT1G18260	AT1G18880		AT1G17080
AT1G17460	AT1G16550	AT1G18330	AT1G18900		AT1G17460
AT1G17810	AT1G16710	AT1G18460	AT1G18975		AT1G17810
AT1G17870	AT1G16720	AT1G18470	AT1G18980		AT1G17870
AT1G18260	AT1G17100	AT1G18830	AT1G19050		AT1G18260
AT1G18330	AT1G17170	AT1G19230	AT1G20010		AT1G18330
AT1G18460	AT1G17180	AT1G19400	AT1G20190		AT1G18460
AT1G18470	AT1G17220	AT1G19420	AT1G20330		AT1G18470
AT1G18740	AT1G17450	AT1G19490	AT1G20490		AT1G18740
AT1G18830	AT1G18210	AT1G19530	AT1G20510		AT1G18830
AT1G19020	AT1G18250	AT1G19660	AT1G20690		AT1G19020
AT1G19400	AT1G18370	AT1G19690	AT1G20691		AT1G19400
AT1G19490	AT1G18560	AT1G19770	AT1G20693		AT1G19490
AT1G19530	AT1G18590	AT1G19980	AT1G20696		AT1G19530
AT1G19610	AT1G18670	AT1G20220	AT1G20770		AT1G19610
AT1G19660	AT1G18710	AT1G20440	AT1G20840		AT1G19660
AT1G20030	AT1G18880	AT1G20460	AT1G20950		AT1G20030
AT1G20070	AT1G18975	AT1G20640	AT1G21100		AT1G20070
AT1G20350	AT1G18980	AT1G20880	AT1G21110		AT1G20350
AT1G20440	AT1G19430	AT1G21000	AT1G21120		AT1G20440
AT1G20450	AT1G19670	AT1G21340	AT1G21130		AT1G20450
AT1G20460	AT1G20190	AT1G21350	AT1G21160		AT1G20460
AT1G20640	AT1G20330	AT1G21410	AT1G21390		AT1G20640
AT1G21000	AT1G20340	AT1G21460	AT1G21400		AT1G21000
AT1G21340	AT1G20693	AT1G21550	AT1G22270		AT1G21340
AT1G21410	AT1G20840	AT1G21560	AT1G22360		AT1G21410
AT1G21460	AT1G20950	AT1G21580	AT1G22410		AT1G21460
AT1G21529	AT1G21100	AT1G21760	AT1G22530		AT1G21529
AT1G21550	AT1G21110	AT1G21940	AT1G22550		AT1G21550
AT1G21760	AT1G21160	AT1G21945	AT1G22590		AT1G21760
AT1G21940	AT1G21170	AT1G22040	AT1G22610		AT1G21940
AT1G21945	AT1G21590	AT1G22110	AT1G22885		AT1G21945
AT1G22040	AT1G21880	AT1G22190	AT1G23170		AT1G22040
AT1G22110	AT1G22060	AT1G22370	AT1G23290		AT1G22110
AT1G22180	AT1G22065	AT1G22470	AT1G23300		AT1G22180
AT1G22190	AT1G22360	AT1G22890	AT1G23410		AT1G22190
AT1G22985	AT1G22410	AT1G22985	AT1G24020		AT1G22985
AT1G22990	AT1G22530	AT1G22990	AT1G24625		AT1G22990
AT1G23040	AT1G22550	AT1G23050	AT1G25220		AT1G23040
AT1G23090	AT1G22590	AT1G23052	AT1G25260		AT1G23090
AT1G23180	AT1G22610	AT1G23090	AT1G25390		AT1G23180
AT1G23330	AT1G23200	AT1G23180	AT1G25425		AT1G23330
AT1G23550	AT1G23290	AT1G23330	AT1G25560		AT1G23550
AT1G23730	AT1G23300	AT1G23550	AT1G26208		AT1G23730
AT1G24095	AT1G24147	AT1G23730	AT1G26210		AT1G24095
AT1G24600	AT1G24310	AT1G23740	AT1G26380		AT1G24600
AT1G25025	AT1G24625	AT1G24095	AT1G26390		AT1G25025
AT1G25112	AT1G25500	AT1G24330	AT1G26410		AT1G25112
AT1G25180	AT1G25530	AT1G24340	AT1G26420		AT1G25180
AT1G26665	AT1G25570	AT1G24851	AT1G26570		AT1G26665
AT1G26690	AT1G26110	AT1G25025	AT1G26650		AT1G26690
AT1G26800	AT1G26410	AT1G25112	AT1G26770		AT1G26800
AT1G27080	AT1G26560	AT1G25180	AT1G26930		AT1G27080
AT1G27090	AT1G26770	AT1G26800	AT1G27130		AT1G27090
AT1G27330	AT1G27060	AT1G27090	AT1G27930		AT1G27330
AT1G27350	AT1G27930	AT1G27170	AT1G27950		AT1G27350
AT1G27461	AT1G27940	AT1G27290	AT1G28130		AT1G27461
AT1G27730	AT1G28130	AT1G27330	AT1G28390		AT1G27730
AT1G27990	AT1G28280	AT1G27350	AT1G28400		AT1G27990
AT1G28330	AT1G28400	AT1G27410	AT1G28600		AT1G28330
AT1G29150	AT1G28440	AT1G27730	AT1G28620		AT1G29150
AT1G29260	AT1G28600	AT1G29030	AT1G28710		AT1G29260
AT1G29330	AT1G28680	AT1G29150	AT1G29280		AT1G29330
AT1G29470	AT1G28685	AT1G29260	AT1G29355		AT1G29470
AT1G29640	AT1G28710	AT1G29470	AT1G29357		AT1G29640
AT1G29770	AT1G29720	AT1G29640	AT1G29910		AT1G29770
AT1G29775	AT1G29910	AT1G29770	AT1G29920		AT1G29775
AT1G29785	AT1G29920	AT1G29780	AT1G29950		AT1G29785
AT1G29810	AT1G29930	AT1G29785	AT1G29960		AT1G29810
AT1G29820	AT1G29950	AT1G29810	AT1G30210		AT1G29820
AT1G30060	AT1G29965	AT1G29820	AT1G30380		AT1G30060
AT1G30070	AT1G30380	AT1G30060	AT1G30510		AT1G30070
AT1G30190	AT1G30510	AT1G30070	AT1G30530		AT1G30190
AT1G30200	AT1G30530	AT1G30200	AT1G30690		AT1G30200
AT1G30220	AT1G30700	AT1G30220	AT1G30700		AT1G30220
AT1G30240	AT1G30760	AT1G30240	AT1G30760		AT1G30240
AT1G30390	AT1G30840	AT1G30390	AT1G30840		AT1G30390
AT1G30473	AT1G30900	AT1G30473	AT1G31330		AT1G30473
AT1G30475	AT1G31070	AT1G30475	AT1G31770		AT1G30475
AT1G30480	AT1G31330	AT1G30480	AT1G31970		AT1G30480
AT1G30500	AT1G31420	AT1G30500	AT1G32450		AT1G30500
AT1G31040	AT1G31580	AT1G31280	AT1G32900		AT1G31040
AT1G31280	AT1G31770	AT1G31335	AT1G33790		AT1G31280
AT1G31335	AT1G32060	AT1G31820	AT1G34040		AT1G31335
AT1G32090	AT1G32440	AT1G32090	AT1G34110		AT1G32090
AT1G32127	AT1G32450	AT1G32330	AT1G34320		AT1G32127
AT1G32330	AT1G32900	AT1G32560	AT1G34340		AT1G32330
AT1G32560	AT1G33811	AT1G32700	AT1G34418		AT1G32560
AT1G32860	AT1G34320	AT1G32860	AT1G35250		AT1G32860
AT1G32870	AT1G34340	AT1G32870	AT1G35260		AT1G32870
AT1G32880	AT1G35250	AT1G32880	AT1G35320		AT1G32880
AT1G32920	AT1G35260	AT1G33055	AT1G35516		AT1G32920
AT1G33055	AT1G35330	AT1G33350	AT1G35560		AT1G33055
AT1G33350	AT1G35560	AT1G33770	AT1G35620		AT1G33350
AT1G33355	AT1G35620	AT1G33780	AT1G35720		AT1G33355
AT1G33415	AT1G36180	AT1G35660	AT1G41830		AT1G33415
AT1G33420	AT1G37130	AT1G36060	AT1G43710		AT1G33420
AT1G33770	AT1G38131	AT1G36630	AT1G44100		AT1G33770
AT1G35660	AT1G41830	AT1G36730	AT1G44800		AT1G35660
AT1G42980	AT1G42970	AT1G42980	AT1G44810		AT1G42980
AT1G43160	AT1G43650	AT1G43160	AT1G45201		AT1G43160
AT1G44414	AT1G44100	AT1G44350	AT1G47210		AT1G44414
AT1G45145	AT1G44575	AT1G44414	AT1G47230		AT1G45145
AT1G45976	AT1G44740	AT1G45976	AT1G47395		AT1G45976
AT1G47278	AT1G44800	AT1G48698	AT1G47400		AT1G47278
AT1G47510	AT1G45201	AT1G48700	AT1G47530		AT1G47510
AT1G47960	AT1G47210	AT1G48710	AT1G47900		AT1G47960
AT1G47980	AT1G47230	AT1G48725	AT1G48100		AT1G47980
AT1G48130	AT1G47480	AT1G48840	AT1G48480		AT1G48130
AT1G48698	AT1G47490	AT1G49130	AT1G48630		AT1G48698
AT1G48700	AT1G47530	AT1G49200	AT1G48650		AT1G48700
AT1G48710	AT1G47900	AT1G49205	AT1G48750		AT1G48710
AT1G48725	AT1G48100	AT1G49320	AT1G48760		AT1G48725
AT1G48840	AT1G48480	AT1G49405	AT1G48920		AT1G48840
AT1G49130	AT1G48630	AT1G49450	AT1G49580		AT1G49130
AT1G49405	AT1G48650	AT1G49560	AT1G49760		AT1G49405
AT1G49450	AT1G48750	AT1G49590	AT1G50490		AT1G49450
AT1G49560	AT1G48920	AT1G49650	AT1G50732		AT1G49560
AT1G49710	AT1G49040	AT1G49710	AT1G51060		AT1G49710
AT1G50260	AT1G49430	AT1G49900	AT1G51090		AT1G50260
AT1G50390	AT1G49580	AT1G50390	AT1G51680		AT1G50390
AT1G50400	AT1G49750	AT1G50400	AT1G51790		AT1G50400
AT1G50590	AT1G49760	AT1G51310	AT1G51800		AT1G50590
AT1G50640	AT1G49870	AT1G51340	AT1G51805		AT1G50640
AT1G51340	AT1G51080	AT1G52560	AT1G51830		AT1G51340
AT1G52560	AT1G51440	AT1G52690	AT1G51860		AT1G52560
AT1G52565	AT1G51520	AT1G52870	AT1G51890		AT1G52565
AT1G52690	AT1G51630	AT1G52880	AT1G52200		AT1G52690
AT1G52827	AT1G51680	AT1G53180	AT1G52280		AT1G52827
AT1G52870	AT1G51790	AT1G53190	AT1G52290		AT1G52870
AT1G53180	AT1G51800	AT1G53320	AT1G52760		AT1G53180
AT1G53320	AT1G51805	AT1G53470	AT1G52905		AT1G53320
AT1G53470	AT1G51830	AT1G53520	AT1G53230		AT1G53470
AT1G53520	AT1G51860	AT1G53540	AT1G53233		AT1G53520
AT1G53540	AT1G51890	AT1G53550	AT1G53310		AT1G53540
AT1G53542	AT1G52000	AT1G53560	AT1G53500		AT1G53542
AT1G53560	AT1G52200	AT1G53730	AT1G53840		AT1G53560
AT1G53730	AT1G52290	AT1G54050	AT1G53950		AT1G53730
AT1G54050	AT1G52760	AT1G54150	AT1G54000		AT1G54050
AT1G54150	AT1G52780	AT1G54160	AT1G54010		AT1G54150
AT1G54160	AT1G52905	AT1G54520	AT1G54090		AT1G54160
AT1G54830	AT1G53040	AT1G54830	AT1G54270		AT1G54830
AT1G54840	AT1G53230	AT1G54870	AT1G54410		AT1G54840
AT1G54860	AT1G53233	AT1G55230	AT1G54690		AT1G54860
AT1G54870	AT1G53300	AT1G55280	AT1G54770		AT1G54870
AT1G55230	AT1G53500	AT1G55300	AT1G54820		AT1G55230
AT1G55300	AT1G53800	AT1G55310	AT1G54970		AT1G55300
AT1G55310	AT1G53840	AT1G55510	AT1G55020		AT1G55310
AT1G55340	AT1G53875	AT1G55530	AT1G55360		AT1G55340
AT1G55530	AT1G54000	AT1G55620	AT1G55370		AT1G55530
AT1G55620	AT1G54270	AT1G55990	AT1G55890		AT1G55620
AT1G55805	AT1G54410	AT1G56170	AT1G56010		AT1G55805
AT1G56170	AT1G54660	AT1G56180	AT1G56070		AT1G56170
AT1G56180	AT1G54820	AT1G56300	AT1G56110		AT1G56180
AT1G56300	AT1G55020	AT1G56340	AT1G56430		AT1G56300
AT1G56340	AT1G55265	AT1G56440	AT1G56670		AT1G56340
AT1G56440	AT1G55360	AT1G56600	AT1G58270		AT1G56440
AT1G56600	AT1G55370	AT1G57820	AT1G58380		AT1G56600
AT1G57820	AT1G55550	AT1G58120	AT1G58602		AT1G57820
AT1G58130	AT1G55670	AT1G58130	AT1G59870		AT1G58130
AT1G58140	AT1G55820	AT1G58140	AT1G59970		AT1G58140
AT1G58170	AT1G55850	AT1G58170	AT1G60390		AT1G58170
AT1G58180	AT1G55910	AT1G58200	AT1G60610		AT1G58180
AT1G58340	AT1G55960	AT1G58340	AT1G60870		AT1G58340
AT1G58889	AT1G56010	AT1G58470	AT1G60950		AT1G58889
AT1G59265	AT1G56070	AT1G58561	AT1G61170		AT1G59265
AT1G59660	AT1G56110	AT1G58889	AT1G61360		AT1G59660
AT1G59860	AT1G56430	AT1G59265	AT1G61560		AT1G59860
AT1G59865	AT1G56670	AT1G59860	AT1G61730		AT1G59865
AT1G59980	AT1G56690	AT1G59865	AT1G61870		AT1G59980
AT1G60190	AT1G57870	AT1G59980	AT1G61970		AT1G60190
AT1G60470	AT1G58235	AT1G60190	AT1G61980		AT1G60470
AT1G60750	AT1G58602	AT1G60750	AT1G62330		AT1G60750
AT1G61340	AT1G59720	AT1G60960	AT1G62370		AT1G61340
AT1G61780	AT1G59890	AT1G61340	AT1G62422		AT1G61780
AT1G62040	AT1G59970	AT1G61640	AT1G62560		AT1G62040
AT1G62290	AT1G60270	AT1G61660	AT1G62610		AT1G62290
AT1G62390	AT1G60390	AT1G62240	AT1G62630		AT1G62390
AT1G62510	AT1G60525	AT1G62290	AT1G62670		AT1G62510
AT1G62515	AT1G60950	AT1G62390	AT1G62790		AT1G62515
AT1G62570	AT1G61170	AT1G62510	AT1G62810		AT1G62570
AT1G62730	AT1G61420	AT1G62515	AT1G62990		AT1G62730
AT1G62740	AT1G61520	AT1G62570	AT1G63000		AT1G62740
AT1G62760	AT1G61730	AT1G62730	AT1G63470		AT1G62760
AT1G62950	AT1G62020	AT1G62740	AT1G63880		AT1G62950
AT1G63010	AT1G62300	AT1G62760	AT1G64170		AT1G63010
AT1G63090	AT1G62400	AT1G62950	AT1G64385		AT1G63090
AT1G63840	AT1G62422	AT1G63010	AT1G64390		AT1G63840
AT1G64200	AT1G62560	AT1G63020	AT1G64640		AT1G64200
AT1G64560	AT1G62630	AT1G63090	AT1G64980		AT1G64560
AT1G65040	AT1G62640	AT1G63840	AT1G65010		AT1G65040
AT1G65090	AT1G62750	AT1G64200	AT1G65060		AT1G65090
AT1G65347	AT1G62990	AT1G64560	AT1G65295		AT1G65347
AT1G65660	AT1G63000	AT1G64561	AT1G65370		AT1G65660
AT1G65980	AT1G63300	AT1G64563	AT1G65520		AT1G65980
AT1G66080	AT1G63470	AT1G65040	AT1G65690		AT1G66080
AT1G66090	AT1G63680	AT1G65660	AT1G65860		AT1G66090
AT1G66400	AT1G64170	AT1G65980	AT1G65870		AT1G66400
AT1G66500	AT1G64390	AT1G66080	AT1G66160		AT1G66500
AT1G66510	AT1G64500	AT1G66090	AT1G66270		AT1G66510
AT1G67010	AT1G64640	AT1G66230	AT1G66280		AT1G67010
AT1G67325	AT1G64650	AT1G66500	AT1G66350		AT1G67325
AT1G67360	AT1G64980	AT1G66510	AT1G66480		AT1G67360
AT1G67365	AT1G65010	AT1G67360	AT1G66700		AT1G67365
AT1G67370	AT1G65060	AT1G67365	AT1G66725		AT1G67370
AT1G67440	AT1G65370	AT1G67370	AT1G66820		AT1G67440
AT1G67920	AT1G65470	AT1G67440	AT1G66830		AT1G67920
AT1G68140	AT1G65540	AT1G67920	AT1G67090		AT1G68140
AT1G68250	AT1G65690	AT1G68140	AT1G67430		AT1G68250
AT1G68290	AT1G65860	AT1G68190	AT1G67750		AT1G68290
AT1G68300	AT1G65870	AT1G68290	AT1G67800		AT1G68300
AT1G68440	AT1G65985	AT1G68300	AT1G67940		AT1G68440
AT1G68490	AT1G66100	AT1G68490	AT1G67970		AT1G68490
AT1G68500	AT1G66200	AT1G68520	AT1G68050		AT1G68500
AT1G68585	AT1G66270	AT1G68620	AT1G68060		AT1G68585
AT1G68862	AT1G66280	AT1G68920	AT1G68100		AT1G68862
AT1G68870	AT1G66480	AT1G68930	AT1G68540		AT1G68870
AT1G68872	AT1G66700	AT1G69490	AT1G68560		AT1G68872
AT1G68930	AT1G66725	AT1G69680	AT1G68880		AT1G68930
AT1G68945	AT1G66840	AT1G70090	AT1G69140		AT1G68945
AT1G69430	AT1G66880	AT1G70180	AT1G69420		AT1G69430
AT1G69480	AT1G67090	AT1G70290	AT1G69523		AT1G69480
AT1G69490	AT1G67420	AT1G70300	AT1G69530		AT1G69490
AT1G70090	AT1G67590	AT1G70440	AT1G69770		AT1G70090
AT1G70140	AT1G67620	AT1G70590	AT1G69870		AT1G70140
AT1G70180	AT1G67740	AT1G71000	AT1G69890		AT1G70180
AT1G70290	AT1G67750	AT1G71330	AT1G70420		AT1G70290
AT1G70300	AT1G68060	AT1G72100	AT1G70580		AT1G70300
AT1G70440	AT1G68450	AT1G72416	AT1G70690		AT1G70440
AT1G70590	AT1G68790	AT1G72430	AT1G70850		AT1G70590
AT1G70820	AT1G69420	AT1G72510	AT1G71430		AT1G70820
AT1G71000	AT1G69530	AT1G72660	AT1G71870		AT1G71000
AT1G71170	AT1G69770	AT1G72670	AT1G71880		AT1G71170
AT1G71240	AT1G69870	AT1G72755	AT1G72050		AT1G71240
AT1G71330	AT1G70060	AT1G72760	AT1G72360		AT1G71330
AT1G71790	AT1G70070	AT1G72800	AT1G72370		AT1G71790
AT1G71990	AT1G70580	AT1G72820	AT1G72600		AT1G71990
AT1G72100	AT1G70690	AT1G73040	AT1G72610		AT1G72100
AT1G72416	AT1G70700	AT1G73065	AT1G72730		AT1G72416
AT1G72490	AT1G70850	AT1G73066	AT1G73220		AT1G72490
AT1G72510	AT1G70940	AT1G73480	AT1G73330		AT1G72510
AT1G72660	AT1G70985	AT1G73680	AT1G73600		AT1G72660
AT1G72670	AT1G71010	AT1G73740	AT1G73630		AT1G72670
AT1G72750	AT1G71430	AT1G73750	AT1G73650		AT1G72750
AT1G72755	AT1G71880	AT1G73920	AT1G73760		AT1G72755
AT1G72760	AT1G72140	AT1G73980	AT1G74030		AT1G72760
AT1G72800	AT1G72450	AT1G74240	AT1G74090		AT1G72800
AT1G73040	AT1G72520	AT1G74290	AT1G74100		AT1G73040
AT1G73190	AT1G72600	AT1G74300	AT1G74380		AT1G73190
AT1G73200	AT1G72610	AT1G74310	AT1G74385		AT1G73200
AT1G73250	AT1G72970	AT1G74320	AT1G74430		AT1G73250
AT1G73260	AT1G73330	AT1G75030	AT1G74458		AT1G73260
AT1G73480	AT1G73600	AT1G75380	AT1G74470		AT1G73480
AT1G73500	AT1G73650	AT1G75390	AT1G74790		AT1G73500
AT1G73680	AT1G73660	AT1G75460	AT1G74800		AT1G73680
AT1G73690	AT1G73930	AT1G75750	AT1G75140		AT1G73690
AT1G73740	AT1G74030	AT1G75860	AT1G75500		AT1G73740
AT1G73750	AT1G74090	AT1G75980	AT1G75550		AT1G73750
AT1G73890	AT1G74100	AT1G76070	AT1G75820		AT1G73890
AT1G73980	AT1G74380	AT1G76080	AT1G76520		AT1G73980
AT1G74240	AT1G74470	AT1G76130	AT1G76680		AT1G74240
AT1G74300	AT1G74720	AT1G76460	AT1G76790		AT1G74300
AT1G74310	AT1G74770	AT1G76465	AT1G76890		AT1G74310
AT1G74320	AT1G74800	AT1G76590	AT1G77260		AT1G74320
AT1G75030	AT1G74850	AT1G77000	AT1G77330		AT1G75030
AT1G75180	AT1G75140	AT1G77120	AT1G77520		AT1G75180
AT1G75270	AT1G75150	AT1G77410	AT1G77530		AT1G75270
AT1G75380	AT1G75500	AT1G77440	AT1G77610		AT1G75380
AT1G75390	AT1G75640	AT1G77460	AT1G77840		AT1G75390
AT1G75400	AT1G75820	AT1G77510	AT1G77885		AT1G75400
AT1G75580	AT1G75990	AT1G77932	AT1G78000		AT1G75580
AT1G75860	AT1G76270	AT1G78150	AT1G78020		AT1G75860
AT1G75980	AT1G76520	AT1G78310	AT1G78170		AT1G75980
AT1G76080	AT1G76660	AT1G78380	AT1G78180		AT1G76080
AT1G76130	AT1G76680	AT1G78600	AT1G78210		AT1G76130
AT1G76190	AT1G76790	AT1G78610	AT1G78650		AT1G76190
AT1G76590	AT1G76890	AT1G78930	AT1G78850		AT1G76590
AT1G76600	AT1G76950	AT1G79430	AT1G78995		AT1G76600
AT1G76940	AT1G77260	AT1G79550	AT1G79150		AT1G76940
AT1G76970	AT1G77400	AT1G79780	AT1G79320		AT1G76970
AT1G77000	AT1G77520	AT1G79820	AT1G79410		AT1G77000
AT1G77120	AT1G77530	AT1G79915	AT1G79470		AT1G77120
AT1G77290	AT1G77580	AT1G79920	AT1G79770		AT1G77290
AT1G77410	AT1G77690	AT1G80315	AT1G80340		AT1G77410
AT1G77440	AT1G77990	AT1G80320	AT1G80490		AT1G77440
AT1G77450	AT1G78000	AT1G80440	AT2G01130		AT1G77450
AT1G77460	AT1G78180	AT1G80480	AT2G01250		AT1G77460
AT1G77590	AT1G78370	AT1G80650	AT2G01260		AT1G77590
AT1G78080	AT1G78440	AT1G80660	AT2G01280		AT1G78080
AT1G78150	AT1G78570	AT1G80670	AT2G01290		AT1G78150
AT1G78310	AT1G78580	AT1G80790	AT2G01505		AT1G78310
AT1G78380	AT1G78820	AT1G80920	AT2G02790		AT1G78380
AT1G78390	AT1G78970	AT2G00340	AT2G02850		AT1G78390
AT1G78400	AT1G78990	AT2G00460	AT2G03010		AT1G78400
AT1G78600	AT1G78995	AT2G00490	AT2G03090		AT1G78600
AT1G78610	AT1G79040	AT2G00500	AT2G03440		AT1G78610
AT1G78922	AT1G79150	AT2G00520	AT2G03450		AT1G78922
AT1G79245	AT1G79350	AT2G01150	AT2G03925		AT1G79245
AT1G79430	AT1G79380	AT2G01390	AT2G04378		AT1G79430
AT1G79550	AT1G79410	AT2G01430	AT2G04780		AT1G79550
AT1G79900	AT1G79470	AT2G02148	AT2G05070		AT1G79900
AT1G79915	AT1G79770	AT2G02220	AT2G05100		AT1G79915
AT1G79920	AT1G80270	AT2G02230	AT2G05790		AT1G79920
AT1G80110	AT1G80340	AT2G02710	AT2G05940		AT1G80110
AT1G80240	AT1G80490	AT2G02750	AT2G06050		AT1G80240
AT1G80440	AT1G80980	AT2G02760	AT2G06520		AT1G80440
AT1G80480	AT2G01130	AT2G02810	AT2G06850		AT1G80480
AT1G80660	AT2G01260	AT2G03020	AT2G06925		AT1G80660
AT1G80780	AT2G01280	AT2G03730	AT2G06950		AT1G80780
AT1G80890	AT2G01290	AT2G03760	AT2G07050		AT1G80890
AT2G00340	AT2G01830	AT2G04030	AT2G09800		AT2G00340
AT2G00460	AT2G02070	AT2G04135	AT2G09990		AT2G00460
AT2G00470	AT2G02100	AT2G04240	AT2G10410		AT2G00470
AT2G00490	AT2G02850	AT2G04295	AT2G10940		AT2G00490
AT2G00500	AT2G03090	AT2G04520	AT2G11140		AT2G00500
AT2G00510	AT2G03140	AT2G04530	AT2G12400		AT2G00510
AT2G00520	AT2G03240	AT2G04690	AT2G12462		AT2G00520
AT2G00840	AT2G03925	AT2G04795	AT2G12550		AT2G00840
AT2G01008	AT2G04235	AT2G05165	AT2G13360		AT2G01008
AT2G01150	AT2G04570	AT2G05195	AT2G13550		AT2G01150
AT2G01390	AT2G04780	AT2G05205	AT2G13555		AT2G01390
AT2G02220	AT2G05070	AT2G05215	AT2G14460		AT2G02220
AT2G02230	AT2G05100	AT2G05300	AT2G14660		AT2G02230
AT2G02350	AT2G05790	AT2G05325	AT2G14750		AT2G02350
AT2G02360	AT2G06520	AT2G05345	AT2G15390		AT2G02360
AT2G02710	AT2G06850	AT2G05365	AT2G15480		AT2G02710
AT2G02750	AT2G06925	AT2G05375	AT2G15490		AT2G02750
AT2G02760	AT2G06950	AT2G05385	AT2G16367		AT2G02760
AT2G02810	AT2G08665	AT2G05590	AT2G16390		AT2G02810
AT2G03760	AT2G10410	AT2G07515	AT2G16500		AT2G03760
AT2G04030	AT2G10931	AT2G07617	AT2G17270		AT2G04030
AT2G04135	AT2G10940	AT2G07623	AT2G17290		AT2G04135
AT2G04240	AT2G11000	AT2G07629	AT2G17630		AT2G04240
AT2G04295	AT2G12462	AT2G07633	AT2G17820		AT2G04295
AT2G04340	AT2G13360	AT2G07638	AT2G18020		AT2G04340
AT2G04350	AT2G13610	AT2G07641	AT2G18150		AT2G04350
AT2G04520	AT2G14247	AT2G07652	AT2G18980		AT2G04520
AT2G04530	AT2G14460	AT2G07655	AT2G19110		AT2G04530
AT2G04555	AT2G14750	AT2G07658	AT2G19130		AT2G04555
AT2G05155	AT2G15320	AT2G07662	AT2G19380		AT2G05155
AT2G05165	AT2G15580	AT2G07665	AT2G19780		AT2G05165
AT2G05195	AT2G15620	AT2G07669	AT2G20450		AT2G05195
AT2G05205	AT2G16367	AT2G07671	AT2G20520		AT2G05205
AT2G05215	AT2G16500	AT2G07672	AT2G20570		AT2G05215
AT2G05235	AT2G17060	AT2G07674	AT2G20610		AT2G05235
AT2G05295	AT2G17265	AT2G07675	AT2G21050		AT2G05295
AT2G05300	AT2G17630	AT2G07677	AT2G21100		AT2G05300
AT2G05325	AT2G17650	AT2G07678	AT2G21660		AT2G05325
AT2G05345	AT2G17820	AT2G07681	AT2G22330		AT2G05345
AT2G05365	AT2G18120	AT2G07682	AT2G22400		AT2G05365
AT2G05375	AT2G18150	AT2G07683	AT2G22430		AT2G05375
AT2G05385	AT2G18790	AT2G07684	AT2G22500		AT2G05385
AT2G05580	AT2G18910	AT2G07687	AT2G22770		AT2G05580
AT2G07335	AT2G18940	AT2G07692	AT2G22795		AT2G07335
AT2G07599	AT2G18980	AT2G07693	AT2G23430		AT2G07599
AT2G07617	AT2G19110	AT2G07695	AT2G23540		AT2G07617
AT2G07621	AT2G19130	AT2G07698	AT2G23600		AT2G07621
AT2G07623	AT2G19380	AT2G07699	AT2G24180		AT2G07623
AT2G07625	AT2G20290	AT2G07706	AT2G25060		AT2G07625
AT2G07629	AT2G20570	AT2G07707	AT2G25250		AT2G07629
AT2G07633	AT2G20610	AT2G07708	AT2G25480		AT2G07633
AT2G07638	AT2G21330	AT2G07709	AT2G25520		AT2G07638
AT2G07641	AT2G21380	AT2G07711	AT2G25810		AT2G07641
AT2G07652	AT2G21390	AT2G07712	AT2G25964		AT2G07652
AT2G07655	AT2G21790	AT2G07715	AT2G26280		AT2G07655
AT2G07658	AT2G22125	AT2G07717	AT2G26730		AT2G07658
AT2G07662	AT2G22250	AT2G07718	AT2G27030		AT2G07662
AT2G07665	AT2G22330	AT2G07719	AT2G27230		AT2G07665
AT2G07667	AT2G22770	AT2G07722	AT2G27402		AT2G07667
AT2G07669	AT2G22900	AT2G07723	AT2G27510		AT2G07669
AT2G07671	AT2G23150	AT2G07725	AT2G27660		AT2G07671
AT2G07672	AT2G23360	AT2G07726	AT2G27840		AT2G07672
AT2G07673	AT2G23430	AT2G07727	AT2G27860		AT2G07673
AT2G07674	AT2G23600	AT2G07728	AT2G28070		AT2G07674
AT2G07675	AT2G23700	AT2G07731	AT2G28080		AT2G07675
AT2G07677	AT2G23740	AT2G07733	AT2G28470		AT2G07677
AT2G07678	AT2G24280	AT2G07734	AT2G28550		AT2G07678
AT2G07681	AT2G24580	AT2G07739	AT2G28600		AT2G07681
AT2G07682	AT2G25060	AT2G07741	AT2G28710		AT2G07682
AT2G07683	AT2G25250	AT2G07747	AT2G28720		AT2G07683
AT2G07684	AT2G25480	AT2G07749	AT2G28740		AT2G07684
AT2G07686	AT2G25530	AT2G07751	AT2G28790		AT2G07686
AT2G07687	AT2G25640	AT2G07768	AT2G28890		AT2G07687
AT2G07691	AT2G25737	AT2G07772	AT2G28960		AT2G07691
AT2G07692	AT2G25810	AT2G07773	AT2G29170		AT2G07692
AT2G07693	AT2G26080	AT2G07774	AT2G29550		AT2G07693
AT2G07695	AT2G26280	AT2G07775	AT2G29980		AT2G07695
AT2G07696	AT2G26730	AT2G07777	AT2G30150		AT2G07696
AT2G07697	AT2G26890	AT2G07779	AT2G30210		AT2G07697
AT2G07698	AT2G27110	AT2G07786	AT2G30470		AT2G07698
AT2G07699	AT2G27402	AT2G07787	AT2G30570		AT2G07699
AT2G07706	AT2G27420	AT2G07798	AT2G30620		AT2G07706
AT2G07707	AT2G27660	AT2G07806	AT2G30760		AT2G07707
AT2G07708	AT2G27840	AT2G07815	AT2G30766		AT2G07708
AT2G07709	AT2G27980	AT2G07835	AT2G30770		AT2G07709
AT2G07711	AT2G28360	AT2G08480	AT2G30820		AT2G07711
AT2G07712	AT2G28470	AT2G08660	AT2G30860		AT2G07712
AT2G07715	AT2G28550	AT2G08680	AT2G30870		AT2G07715
AT2G07717	AT2G28620	AT2G08730	AT2G30880		AT2G07717
AT2G07718	AT2G28720	AT2G08960	AT2G30930		AT2G07718
AT2G07719	AT2G28740	AT2G09335	AT2G31290		AT2G07719
AT2G07722	AT2G28780	AT2G09400	AT2G31360		AT2G07722
AT2G07723	AT2G28790	AT2G14880	AT2G31390		AT2G07723
AT2G07724	AT2G28950	AT2G15790	AT2G32060		AT2G07724
AT2G07725	AT2G29060	AT2G15800	AT2G32220		AT2G07725
AT2G07726	AT2G29550	AT2G15810	AT2G32960		AT2G07726
AT2G07727	AT2G29690	AT2G15880	AT2G32990		AT2G07727
AT2G07728	AT2G29940	AT2G16245	AT2G33480		AT2G07728
AT2G07731	AT2G29980	AT2G16250	AT2G33530		AT2G07731
AT2G07733	AT2G30150	AT2G16586	AT2G33540		AT2G07733
AT2G07734	AT2G30620	AT2G16660	AT2G33830		AT2G07734
AT2G07736	AT2G30760	AT2G17900	AT2G33855		AT2G07736
AT2G07737	AT2G30766	AT2G18193	AT2G33860		AT2G07737
AT2G07739	AT2G30770	AT2G18260	AT2G34350		AT2G07739
AT2G07741	AT2G30820	AT2G18410	AT2G34430		AT2G07741
AT2G07747	AT2G30860	AT2G18510	AT2G34585		AT2G07747
AT2G07749	AT2G31270	AT2G18550	AT2G35000		AT2G07749
AT2G07751	AT2G31280	AT2G18700	AT2G35770		AT2G07751
AT2G07754	AT2G31320	AT2G18780	AT2G35859		AT2G07754
AT2G07768	AT2G31400	AT2G19310	AT2G35860		AT2G07768
AT2G07771	AT2G31750	AT2G19570	AT2G35960		AT2G07771
AT2G07772	AT2G31751	AT2G19572	AT2G36380		AT2G07772
AT2G07773	AT2G31790	AT2G19580	AT2G36400		AT2G07773
AT2G07774	AT2G32220	AT2G19582	AT2G36410		AT2G07774
AT2G07775	AT2G32400	AT2G19900	AT2G36430		AT2G07775
AT2G07776	AT2G32640	AT2G20080	AT2G36590		AT2G07776
AT2G07777	AT2G32720	AT2G20180	AT2G36620		AT2G07777
AT2G07779	AT2G32850	AT2G20550	AT2G36870		AT2G07779
AT2G07783	AT2G32860	AT2G20555	AT2G36880		AT2G07783
AT2G07785	AT2G32950	AT2G20560	AT2G36970		AT2G07785
AT2G07786	AT2G32960	AT2G20670	AT2G37040		AT2G07786
AT2G07787	AT2G32990	AT2G20940	AT2G37130		AT2G07787
AT2G07795	AT2G33330	AT2G21130	AT2G37190		AT2G07795
AT2G07798	AT2G33530	AT2G21150	AT2G37220		AT2G07798
AT2G07806	AT2G33540	AT2G21180	AT2G37310		AT2G07806
AT2G07808	AT2G33770	AT2G21210	AT2G37450		AT2G07808
AT2G07811	AT2G33855	AT2G21430	AT2G37580		AT2G07811
AT2G07815	AT2G33860	AT2G21490	AT2G37630		AT2G07815
AT2G07827	AT2G34060	AT2G21560	AT2G37640		AT2G07827
AT2G07835	AT2G34150	AT2G21640	AT2G37710		AT2G07835
AT2G07850	AT2G34170	AT2G21820	AT2G38110		AT2G07850
AT2G08780	AT2G34420	AT2G21940	AT2G38120		AT2G08780
AT2G08960	AT2G34430	AT2G22240	AT2G38210		AT2G08960
AT2G09335	AT2G34490	AT2G22470	AT2G38230		AT2G09335
AT2G14880	AT2G34680	AT2G23110	AT2G38380		AT2G14880
AT2G15310	AT2G34710	AT2G23210	AT2G38860		AT2G15310
AT2G15790	AT2G35020	AT2G23290	AT2G38995		AT2G15790
AT2G15810	AT2G35050	AT2G23340	AT2G39130		AT2G15810
AT2G16245	AT2G35155	AT2G23690	AT2G39210		AT2G16245
AT2G16250	AT2G35770	AT2G23780	AT2G39220		AT2G16250
AT2G16586	AT2G35850	AT2G23790	AT2G39250		AT2G16586
AT2G16660	AT2G35859	AT2G24100	AT2G39375		AT2G16660
AT2G17380	AT2G35860	AT2G24120	AT2G39380		AT2G17380
AT2G17680	AT2G35960	AT2G24550	AT2G39450		AT2G17680
AT2G17900	AT2G36010	AT2G24680	AT2G39460		AT2G17900
AT2G18170	AT2G36380	AT2G25090	AT2G39518		AT2G18170
AT2G18193	AT2G36430	AT2G25110	AT2G39700		AT2G18193
AT2G18240	AT2G36490	AT2G25140	AT2G39710		AT2G18240
AT2G18260	AT2G36570	AT2G25920	AT2G39800		AT2G18260
AT2G18410	AT2G36590	AT2G25930	AT2G40080		AT2G18410
AT2G18510	AT2G36720	AT2G25950	AT2G40190		AT2G18510
AT2G18540	AT2G36870	AT2G26000	AT2G40230		AT2G18540
AT2G18550	AT2G36880	AT2G26140	AT2G40475		AT2G18550
AT2G18630	AT2G36970	AT2G26150	AT2G40480		AT2G18630
AT2G18700	AT2G36980	AT2G26690	AT2G40920		AT2G18700
AT2G18780	AT2G37040	AT2G26692	AT2G41090		AT2G18780
AT2G19150	AT2G37220	AT2G26860	AT2G41110		AT2G19150
AT2G19310	AT2G37280	AT2G27060	AT2G41178		AT2G19310
AT2G19560	AT2G37450	AT2G27200	AT2G41180		AT2G19560
AT2G19570	AT2G37460	AT2G27280	AT2G41380		AT2G19570
AT2G19572	AT2G37630	AT2G27380	AT2G41480		AT2G19572
AT2G19580	AT2G37640	AT2G27580	AT2G41560		AT2G19580
AT2G19582	AT2G37710	AT2G28000	AT2G41650		AT2G19582
AT2G19900	AT2G38120	AT2G29290	AT2G41770		AT2G19900
AT2G20550	AT2G38210	AT2G29300	AT2G41880		AT2G20550
AT2G20555	AT2G38230	AT2G29400	AT2G41950		AT2G20555
AT2G20560	AT2G38380	AT2G29450	AT2G42190		AT2G20560
AT2G20670	AT2G38860	AT2G29460	AT2G42530		AT2G20670
AT2G20720	AT2G38995	AT2G29470	AT2G42540		AT2G20720
AT2G20880	AT2G39130	AT2G29480	AT2G42840		AT2G20880
AT2G20940	AT2G39220	AT2G29485	AT2G43100		AT2G20940
AT2G21130	AT2G39375	AT2G29500	AT2G43110		AT2G21130
AT2G21150	AT2G39380	AT2G29670	AT2G43360		AT2G21150
AT2G21180	AT2G39450	AT2G29740	AT2G43590		AT2G21180
AT2G21240	AT2G39700	AT2G30000	AT2G44010		AT2G21240
AT2G21490	AT2G39710	AT2G30130	AT2G44020		AT2G21490
AT2G21560	AT2G39800	AT2G30320	AT2G44230		AT2G21560
AT2G21640	AT2G40020	AT2G30360	AT2G44300		AT2G21640
AT2G21820	AT2G40100	AT2G30362	AT2G44360		AT2G21820
AT2G21940	AT2G40150	AT2G30480	AT2G44370		AT2G21940
AT2G22090	AT2G40230	AT2G30550	AT2G44490		AT2G22090
AT2G22240	AT2G40460	AT2G30790	AT2G44730		AT2G22240
AT2G22470	AT2G40475	AT2G31560	AT2G44790		AT2G22470
AT2G22830	AT2G40480	AT2G31650	AT2G44940		AT2G22830
AT2G22850	AT2G40610	AT2G31830	AT2G45160		AT2G22850
AT2G23110	AT2G40820	AT2G31865	AT2G45180		AT2G23110
AT2G23210	AT2G40940	AT2G31945	AT2G45220		AT2G23210
AT2G23240	AT2G41040	AT2G32020	AT2G45310		AT2G23240
AT2G23290	AT2G41090	AT2G32120	AT2G45315		AT2G23290
AT2G23640	AT2G41290	AT2G32190	AT2G45470		AT2G23640
AT2G23780	AT2G41380	AT2G32235	AT2G45750		AT2G23780
AT2G23790	AT2G41480	AT2G32510	AT2G45830		AT2G23790
AT2G24100	AT2G41560	AT2G32560	AT2G46150		AT2G24100
AT2G24110	AT2G41650	AT2G32920	AT2G46170		AT2G24110
AT2G24680	AT2G42190	AT2G33060	AT2G46330		AT2G24680
AT2G25070	AT2G42485	AT2G33590	AT2G46420		AT2G25070
AT2G25090	AT2G42840	AT2G33600	AT2G46535		AT2G25090
AT2G25110	AT2G42900	AT2G33610	AT2G46650		AT2G25110
AT2G25140	AT2G43100	AT2G33700	AT2G46750		AT2G25140
AT2G25880	AT2G43110	AT2G33735	AT2G46870		AT2G25880
AT2G25890	AT2G43360	AT2G33740	AT2G46890		AT2G25890
AT2G25920	AT2G43410	AT2G34040	AT2G46920		AT2G25920
AT2G25930	AT2G43550	AT2G34390	AT2G47200		AT2G25930
AT2G25950	AT2G43700	AT2G34440	AT2G47240		AT2G25950
AT2G26000	AT2G43800	AT2G34450	AT2G47370		AT2G26000
AT2G26140	AT2G43910	AT2G34500	AT2G47450		AT2G26140
AT2G26150	AT2G44230	AT2G34590	AT2G47670		AT2G26150
AT2G26680	AT2G44490	AT2G34610	AT2G47990		AT2G26680
AT2G26860	AT2G44730	AT2G34620	AT3G00300		AT2G26860
AT2G27200	AT2G44940	AT2G34770	AT3G01190		AT2G27200
AT2G27580	AT2G45160	AT2G34840	AT3G01290		AT2G27580
AT2G28000	AT2G45220	AT2G35150	AT3G01420		AT2G28000
AT2G28400	AT2G45290	AT2G35300	AT3G01470		AT2G28400
AT2G29380	AT2G45300	AT2G35420	AT3G01660		AT2G29380
AT2G29400	AT2G45470	AT2G35900	AT3G01720		AT2G29400
AT2G29450	AT2G45540	AT2G36026	AT3G01780		AT2G29450
AT2G29460	AT2G45750	AT2G36460	AT3G01950		AT2G29460
AT2G29470	AT2G45830	AT2G36640	AT3G01960		AT2G29470
AT2G29480	AT2G45850	AT2G36750	AT3G02020		AT2G29480
AT2G29485	AT2G46440	AT2G36770	AT3G02030		AT2G29485
AT2G29500	AT2G46450	AT2G36790	AT3G02040		AT2G29500
AT2G29670	AT2G46535	AT2G36792	AT3G02230		AT2G29670
AT2G29740	AT2G46650	AT2G36800	AT3G02470		AT2G29740
AT2G30000	AT2G46750	AT2G36810	AT3G02530		AT2G30000
AT2G30320	AT2G46870	AT2G36830	AT3G02560		AT2G30320
AT2G30360	AT2G46920	AT2G36950	AT3G02570		AT2G30360
AT2G30362	AT2G47000	AT2G37180	AT3G02600		AT2G30362
AT2G30480	AT2G47240	AT2G37760	AT3G02640		AT2G30480
AT2G30550	AT2G47370	AT2G38310	AT3G02760		AT2G30550
AT2G30790	AT2G47800	AT2G38340	AT3G02790		AT2G30790
AT2G31305	AT2G47910	AT2G38410	AT3G02870		AT2G31305
AT2G31560	AT3G01120	AT2G38820	AT3G02880		AT2G31560
AT2G31865	AT3G01190	AT2G39020	AT3G03130		AT2G31865
AT2G31945	AT3G01500	AT2G39110	AT3G03190		AT2G31945
AT2G32020	AT3G01550	AT2G39400	AT3G03200		AT2G32020
AT2G32120	AT3G01680	AT2G39570	AT3G03265		AT2G32120
AT2G32190	AT3G01720	AT2G39740	AT3G03450		AT2G32190
AT2G32510	AT3G01995	AT2G40000	AT3G03475		AT2G32510
AT2G32920	AT3G02020	AT2G40170	AT3G03680		AT2G32920
AT2G33060	AT3G02050	AT2G40300	AT3G03710		AT2G33060
AT2G33585	AT3G02060	AT2G40340	AT3G03780		AT2G33585
AT2G33590	AT3G02170	AT2G40830	AT3G04290		AT2G33590
AT2G33600	AT3G02230	AT2G40950	AT3G04570		AT2G33600
AT2G33610	AT3G02350	AT2G40960	AT3G04720		AT2G33610
AT2G33700	AT3G02470	AT2G41100	AT3G04770		AT2G33700
AT2G33735	AT3G02560	AT2G41105	AT3G04840		AT2G33735
AT2G33740	AT3G02570	AT2G41150	AT3G04910		AT2G33740
AT2G34040	AT3G02600	AT2G41160	AT3G05130		AT2G34040
AT2G34440	AT3G02640	AT2G41250	AT3G05200		AT2G34440
AT2G34450	AT3G02760	AT2G41550	AT3G05560		AT2G34450
AT2G34500	AT3G02790	AT2G41730	AT3G05800		AT2G34500
AT2G34590	AT3G02870	AT2G42150	AT3G05910		AT2G34590
AT2G34610	AT3G03050	AT2G42270	AT3G06010		AT2G34610
AT2G34620	AT3G03190	AT2G42560	AT3G06040		AT2G34620
AT2G35150	AT3G03200	AT2G43010	AT3G06125		AT2G35150
AT2G35300	AT3G03475	AT2G43020	AT3G06650		AT2G35300
AT2G35900	AT3G03680	AT2G43500	AT3G06840		AT2G35900
AT2G36026	AT3G03710	AT2G43570	AT3G06868		AT2G36026
AT2G36030	AT3G03770	AT2G43630	AT3G06870		AT2G36030
AT2G36220	AT3G03780	AT2G44080	AT3G07050		AT2G36220
AT2G36460	AT3G04290	AT2G44130	AT3G07195		AT2G36460
AT2G36640	AT3G04760	AT2G44170	AT3G07230		AT2G36640
AT2G36750	AT3G05220	AT2G44480	AT3G07315		AT2G36750
AT2G36770	AT3G05600	AT2G44660	AT3G07320		AT2G36770
AT2G36780	AT3G05910	AT2G44993	AT3G07390		AT2G36780
AT2G36790	AT3G06125	AT2G45170	AT3G07460		AT2G36790
AT2G36792	AT3G06145	AT2G45360	AT3G07555		AT2G36792
AT2G36830	AT3G06290	AT2G45380	AT3G07570		AT2G36830
AT2G36900	AT3G06455	AT2G46220	AT3G07720		AT2G36900
AT2G36950	AT3G06550	AT2G46240	AT3G07810		AT2G36950
AT2G37180	AT3G06650	AT2G46250	AT3G08520		AT2G37180
AT2G37440	AT3G06868	AT2G46270	AT3G08580		AT2G37440
AT2G37870	AT3G06870	AT2G46780	AT3G08620		AT2G37870
AT2G38250	AT3G06880	AT2G46800	AT3G08630		AT2G38250
AT2G38310	AT3G06890	AT2G47015	AT3G08640		AT2G38310
AT2G38340	AT3G07050	AT2G47020	AT3G09162		AT2G38340
AT2G38820	AT3G07195	AT2G47180	AT3G09200		AT2G38820
AT2G39100	AT3G07315	AT2G47410	AT3G09220		AT2G39100
AT2G39110	AT3G07320	AT2G47700	AT3G09250		AT2G39110
AT2G39350	AT3G07390	AT2G47730	AT3G09260		AT2G39350
AT2G39400	AT3G07530	AT2G47950	AT3G09270		AT2G39400
AT2G39725	AT3G07555	AT2G48010	AT3G09310		AT2G39725
AT2G40000	AT3G07720	AT2G48140	AT3G09540		AT2G40000
AT2G40170	AT3G08040	AT3G00210	AT3G09600		AT2G40170
AT2G40300	AT3G08580	AT3G00330	AT3G09650		AT2G40300
AT2G40830	AT3G08640	AT3G00650	AT3G09710		AT2G40830
AT2G40950	AT3G08660	AT3G00660	AT3G10080		AT2G40950
AT2G40960	AT3G08770	AT3G01070	AT3G10090		AT2G40960
AT2G41100	AT3G09162	AT3G01100	AT3G10190		AT2G41100
AT2G41105	AT3G09220	AT3G01335	AT3G10340		AT2G41105
AT2G41160	AT3G09260	AT3G01555	AT3G10570		AT2G41160
AT2G41170	AT3G09270	AT3G01560	AT3G10610		AT2G41170
AT2G41190	AT3G09540	AT3G01650	AT3G10840		AT2G41190
AT2G41730	AT3G09590	AT3G01770	AT3G11110		AT2G41730
AT2G41870	AT3G09650	AT3G01895	AT3G11120		AT2G41870
AT2G42150	AT3G09710	AT3G02140	AT3G11420		AT2G42150
AT2G42560	AT3G09890	AT3G02150	AT3G11800		AT2G42560
AT2G42980	AT3G09895	AT3G02205	AT3G12370		AT2G42980
AT2G43010	AT3G10050	AT3G02480	AT3G12600		AT2G43010
AT2G43020	AT3G10080	AT3G02535	AT3G12610		AT2G43020
AT2G43340	AT3G10160	AT3G02860	AT3G12860		AT2G43340
AT2G43500	AT3G10180	AT3G02990	AT3G12915		AT2G43500
AT2G43570	AT3G10340	AT3G03060	AT3G12977		AT2G43570
AT2G43630	AT3G10540	AT3G03140	AT3G13110		AT2G43630
AT2G44080	AT3G10570	AT3G03165	AT3G13190		AT2G44080
AT2G44130	AT3G10610	AT3G03215	AT3G13690		AT2G44130
AT2G44140	AT3G11110	AT3G03270	AT3G13720		AT2G44140
AT2G44170	AT3G11130	AT3G03310	AT3G13920		AT2G44170
AT2G44660	AT3G11800	AT3G03320	AT3G13940		AT2G44660
AT2G45170	AT3G12110	AT3G03341	AT3G14210		AT2G45170
AT2G45360	AT3G12270	AT3G03520	AT3G14310		AT2G45360
AT2G45380	AT3G12590	AT3G03535	AT3G14790		AT2G45380
AT2G45570	AT3G12610	AT3G03630	AT3G15030		AT2G45570
AT2G45980	AT3G12685	AT3G03815	AT3G15300		AT2G45980
AT2G46220	AT3G12870	AT3G03855	AT3G15570		AT2G46220
AT2G46240	AT3G12900	AT3G03950	AT3G15680		AT2G46240
AT2G46250	AT3G12950	AT3G04000	AT3G15710		AT2G46250
AT2G46270	AT3G13110	AT3G04060	AT3G15730		AT2G46270
AT2G46670	AT3G13190	AT3G04130	AT3G15820		AT2G46670
AT2G46720	AT3G13300	AT3G04530	AT3G15950		AT2G46720
AT2G46790	AT3G13330	AT3G04605	AT3G15980		AT2G46790
AT2G47015	AT3G13690	AT3G04685	AT3G16080		AT2G47015
AT2G47020	AT3G13920	AT3G04710	AT3G16240		AT2G47020
AT2G47180	AT3G13940	AT3G05030	AT3G16280		AT2G47180
AT2G47730	AT3G14210	AT3G05327	AT3G16340		AT2G47730
AT2G47770	AT3G14270	AT3G05360	AT3G16370		AT2G47770
AT2G47890	AT3G14310	AT3G06070	AT3G16400		AT2G47890
AT2G47950	AT3G14420	AT3G06180	AT3G16420		AT2G47950
AT2G48140	AT3G14650	AT3G06355	AT3G16430		AT2G48140
AT3G00210	AT3G14690	AT3G06400	AT3G16450		AT3G00210
AT3G00650	AT3G14740	AT3G06420	AT3G16460		AT3G00650
AT3G00660	AT3G14790	AT3G06433	AT3G16730		AT3G00660
AT3G01070	AT3G14840	AT3G06540	AT3G16780		AT3G01070
AT3G01100	AT3G15030	AT3G06660	AT3G16830		AT3G01100
AT3G01335	AT3G15180	AT3G06760	AT3G16860		AT3G01335
AT3G01520	AT3G15730	AT3G06780	AT3G16870		AT3G01520
AT3G01570	AT3G15820	AT3G07080	AT3G17120		AT3G01570
AT3G01650	AT3G15950	AT3G07090	AT3G17390		AT3G01650
AT3G02095	AT3G16240	AT3G07150	AT3G17609		AT3G02095
AT3G02140	AT3G16290	AT3G07255	AT3G17840		AT3G02140
AT3G02205	AT3G16340	AT3G07310	AT3G18000		AT3G02205
AT3G02210	AT3G16370	AT3G07350	AT3G18130		AT3G02210
AT3G02480	AT3G16400	AT3G07365	AT3G18740		AT3G02480
AT3G02535	AT3G16420	AT3G07370	AT3G18780		AT3G02535
AT3G02550	AT3G16430	AT3G07770	AT3G18830		AT3G02550
AT3G02555	AT3G16450	AT3G07870	AT3G19010		AT3G02555
AT3G02860	AT3G16460	AT3G08590	AT3G19360		AT3G02860
AT3G02990	AT3G16730	AT3G08690	AT3G19370		AT3G02990
AT3G03060	AT3G16830	AT3G08700	AT3G19450		AT3G03060
AT3G03165	AT3G16860	AT3G08960	AT3G19710		AT3G03165
AT3G03170	AT3G16870	AT3G08970	AT3G19930		AT3G03170
AT3G03215	AT3G17120	AT3G08980	AT3G19980		AT3G03215
AT3G03270	AT3G17390	AT3G08990	AT3G20015		AT3G03270
AT3G03280	AT3G17609	AT3G09010	AT3G20080		AT3G03280
AT3G03310	AT3G17640	AT3G09085	AT3G20370		AT3G03310
AT3G03320	AT3G17750	AT3G09350	AT3G21055		AT3G03320
AT3G03341	AT3G17840	AT3G09360	AT3G21190		AT3G03341
AT3G03470	AT3G18000	AT3G09370	AT3G21220		AT3G03470
AT3G03520	AT3G18130	AT3G09375	AT3G21240		AT3G03520
AT3G03535	AT3G18217	AT3G09400	AT3G21390		AT3G03535
AT3G03855	AT3G18290	AT3G09405	AT3G21540		AT3G03855
AT3G03950	AT3G18490	AT3G09430	AT3G21560		AT3G03950
AT3G04000	AT3G18780	AT3G09440	AT3G21670		AT3G04000
AT3G04060	AT3G18830	AT3G09450	AT3G21690		AT3G04060
AT3G04160	AT3G19050	AT3G09640	AT3G21770		AT3G04160
AT3G04605	AT3G19370	AT3G10010	AT3G21800		AT3G04605
AT3G04685	AT3G19380	AT3G10020	AT3G22120		AT3G04685
AT3G04710	AT3G19430	AT3G10030	AT3G22121		AT3G04710
AT3G04970	AT3G19440	AT3G10113	AT3G22230		AT3G04970
AT3G05030	AT3G19450	AT3G10120	AT3G22660		AT3G05030
AT3G05260	AT3G19660	AT3G10250	AT3G22800		AT3G05260
AT3G05580	AT3G19710	AT3G10380	AT3G23110		AT3G05580
AT3G05675	AT3G19720	AT3G10390	AT3G23390		AT3G05675
AT3G06270	AT3G19870	AT3G10640	AT3G23410		AT3G06270
AT3G06355	AT3G19930	AT3G10800	AT3G23430		AT3G06355
AT3G06420	AT3G20015	AT3G10815	AT3G23470		AT3G06420
AT3G06433	AT3G20080	AT3G10820	AT3G23810		AT3G06433
AT3G06520	AT3G20200	AT3G11010	AT3G24080		AT3G06520
AT3G06540	AT3G20370	AT3G11020	AT3G24300		AT3G06540
AT3G06660	AT3G20780	AT3G11030	AT3G24503		AT3G06660
AT3G06760	AT3G20820	AT3G11670	AT3G24670		AT3G06760
AT3G07080	AT3G21055	AT3G11690	AT3G25030		AT3G07080
AT3G07090	AT3G21110	AT3G12050	AT3G25190		AT3G07090
AT3G07140	AT3G21190	AT3G12150	AT3G25250		AT3G07140
AT3G07150	AT3G21240	AT3G12300	AT3G25410		AT3G07150
AT3G07255	AT3G21390	AT3G12510	AT3G25520		AT3G07255
AT3G07350	AT3G21480	AT3G12560	AT3G25700		AT3G07350
AT3G07365	AT3G21540	AT3G12570	AT3G25717		AT3G07365
AT3G07370	AT3G21560	AT3G12580	AT3G25820		AT3G07370
AT3G07770	AT3G21670	AT3G12980	AT3G25830		AT3G07770
AT3G08375	AT3G21690	AT3G13062	AT3G26210		AT3G08375
AT3G08590	AT3G21755	AT3G13224	AT3G26330		AT3G08590
AT3G08690	AT3G21760	AT3G13277	AT3G26395		AT3G08690
AT3G08900	AT3G21770	AT3G13470	AT3G26470		AT3G08900
AT3G08960	AT3G21800	AT3G13480	AT3G26520		AT3G08960
AT3G08970	AT3G22120	AT3G13860	AT3G26650		AT3G08970
AT3G08980	AT3G22121	AT3G14075	AT3G27250		AT3G08980
AT3G08990	AT3G22660	AT3G14170	AT3G27690		AT3G08990
AT3G09010	AT3G22670	AT3G14200	AT3G28160		AT3G09010
AT3G09085	AT3G22780	AT3G14440	AT3G28180		AT3G09085
AT3G09230	AT3G22790	AT3G14570	AT3G28200		AT3G09230
AT3G09350	AT3G22800	AT3G14590	AT3G28220		AT3G09350
AT3G09360	AT3G22890	AT3G14620	AT3G28290		AT3G09360
AT3G09370	AT3G23300	AT3G14780	AT3G28300		AT3G09370
AT3G09375	AT3G23430	AT3G14890	AT3G28345		AT3G09375
AT3G09390	AT3G23510	AT3G15070	AT3G28860		AT3G09390
AT3G09400	AT3G23530	AT3G15340	AT3G28900		AT3G09400
AT3G09405	AT3G23810	AT3G15500	AT3G28920		AT3G09405
AT3G09430	AT3G24080	AT3G15670	AT3G29030		AT3G09430
AT3G09440	AT3G24300	AT3G15760	AT3G29250		AT3G09440
AT3G09450	AT3G24480	AT3G15770	AT3G29375		AT3G09450
AT3G09455	AT3G24503	AT3G15780	AT3G29776		AT3G09455
AT3G09570	AT3G25100	AT3G15800	AT3G30380		AT3G09570
AT3G09640	AT3G25190	AT3G15870	AT3G43600		AT3G09640
AT3G09980	AT3G25410	AT3G15990	AT3G43720		AT3G09980
AT3G10020	AT3G25500	AT3G16040	AT3G43800		AT3G10020
AT3G10030	AT3G25560	AT3G16050	AT3G43960		AT3G10030
AT3G10113	AT3G25670	AT3G17030	AT3G44380		AT3G10113
AT3G10250	AT3G25690	AT3G17110	AT3G44450		AT3G10250
AT3G10450	AT3G25700	AT3G17330	AT3G44550		AT3G10450
AT3G10500	AT3G25717	AT3G17350	AT3G44720		AT3G10500
AT3G10640	AT3G25820	AT3G17520	AT3G44730		AT3G10640
AT3G10800	AT3G25830	AT3G17611	AT3G44735		AT3G10800
AT3G10815	AT3G25950	AT3G17630	AT3G44740		AT3G10815
AT3G10820	AT3G26330	AT3G17660	AT3G44750		AT3G10820
AT3G10985	AT3G26520	AT3G17712	AT3G45600		AT3G10985
AT3G11010	AT3G26570	AT3G17790	AT3G45650		AT3G11010
AT3G11020	AT3G26590	AT3G18310	AT3G45710		AT3G11020
AT3G11030	AT3G26610	AT3G18370	AT3G45930		AT3G11030
AT3G11340	AT3G26650	AT3G18773	AT3G45980		AT3G11340
AT3G11670	AT3G26730	AT3G18775	AT3G46030		AT3G11670
AT3G11690	AT3G26744	AT3G19030	AT3G46270		AT3G11690
AT3G12050	AT3G27120	AT3G19180	AT3G46320		AT3G12050
AT3G12300	AT3G27270	AT3G19270	AT3G46820		AT3G12300
AT3G12510	AT3G27330	AT3G19290	AT3G46830		AT3G12510
AT3G12560	AT3G27690	AT3G19300	AT3G46845		AT3G12560
AT3G12580	AT3G28040	AT3G19580	AT3G46940		AT3G12580
AT3G12760	AT3G28070	AT3G19680	AT3G46970		AT3G12760
AT3G13130	AT3G28080	AT3G19830	AT3G47370		AT3G13130
AT3G13224	AT3G28160	AT3G19860	AT3G47470		AT3G13224
AT3G13235	AT3G28180	AT3G20010	AT3G47640		AT3G13235
AT3G13277	AT3G28220	AT3G20540	AT3G47820		AT3G13277
AT3G13470	AT3G28290	AT3G20830	AT3G48700		AT3G13470
AT3G13480	AT3G28300	AT3G21060	AT3G48720		AT3G13480
AT3G13860	AT3G28345	AT3G21140	AT3G49010		AT3G13860
AT3G14075	AT3G28860	AT3G21150	AT3G49120		AT3G14075
AT3G14200	AT3G28920	AT3G21420	AT3G49260		AT3G14200
AT3G14230	AT3G29030	AT3G21660	AT3G49910		AT3G14230
AT3G14440	AT3G29034	AT3G22090	AT3G49990		AT3G14440
AT3G14560	AT3G29075	AT3G22100	AT3G50300		AT3G14560
AT3G14590	AT3G29360	AT3G22150	AT3G51160		AT3G14590
AT3G14595	AT3G29375	AT3G22370	AT3G51238		AT3G14595
AT3G14620	AT3G30875	AT3G22830	AT3G51240		AT3G14620
AT3G14750	AT3G43300	AT3G22840	AT3G51280		AT3G14750
AT3G14780	AT3G43590	AT3G23080	AT3G51470		AT3G14780
AT3G14880	AT3G43600	AT3G23150	AT3G51720		AT3G14880
AT3G15040	AT3G43720	AT3G23170	AT3G51920		AT3G15040
AT3G15070	AT3G43800	AT3G23910	AT3G51950		AT3G15070
AT3G15340	AT3G43960	AT3G23920	AT3G52170		AT3G15340
AT3G15500	AT3G44380	AT3G23990	AT3G52310		AT3G15500
AT3G15670	AT3G44450	AT3G24000	AT3G52340		AT3G15670
AT3G15760	AT3G44530	AT3G24005	AT3G52500		AT3G15760
AT3G15770	AT3G44550	AT3G24070	AT3G52520		AT3G15770
AT3G15780	AT3G44720	AT3G24100	AT3G52605		AT3G15780
AT3G15870	AT3G44990	AT3G24495	AT3G52610		AT3G15870
AT3G15990	AT3G45160	AT3G24500	AT3G52710		AT3G15990
AT3G16040	AT3G45400	AT3G25230	AT3G52740		AT3G16040
AT3G16050	AT3G45650	AT3G25240	AT3G52870		AT3G16050
AT3G17030	AT3G45710	AT3G25495	AT3G52910		AT3G17030
AT3G17110	AT3G45780	AT3G25990	AT3G52920		AT3G17110
AT3G17330	AT3G45930	AT3G26170	AT3G53020		AT3G17330
AT3G17350	AT3G45980	AT3G26180	AT3G53260		AT3G17350
AT3G17520	AT3G46270	AT3G26300	AT3G53430		AT3G17520
AT3G17611	AT3G46320	AT3G26440	AT3G53460		AT3G17611
AT3G17790	AT3G46590	AT3G26450	AT3G53730		AT3G17790
AT3G18300	AT3G46610	AT3G26510	AT3G54220		AT3G18300
AT3G18310	AT3G46820	AT3G26512	AT3G54250		AT3G18310
AT3G18370	AT3G46845	AT3G26740	AT3G54400		AT3G18370
AT3G18710	AT3G46940	AT3G26890	AT3G54470		AT3G18710
AT3G18773	AT3G47350	AT3G27025	AT3G54600		AT3G18773
AT3G18775	AT3G47470	AT3G27860	AT3G54625		AT3G18775
AT3G18850	AT3G47640	AT3G27870	AT3G54630		AT3G18850
AT3G19030	AT3G47820	AT3G27997	AT3G54830		AT3G19030
AT3G19184	AT3G47890	AT3G28210	AT3G54890		AT3G19184
AT3G19270	AT3G47960	AT3G28270	AT3G54960		AT3G19270
AT3G19300	AT3G48450	AT3G28740	AT3G54980		AT3G19300
AT3G19580	AT3G48700	AT3G28770	AT3G54990		AT3G19580
AT3G19680	AT3G48720	AT3G29470	AT3G55010		AT3G19680
AT3G19920	AT3G48980	AT3G29810	AT3G55130		AT3G19920
AT3G21140	AT3G48990	AT3G30122	AT3G55150		AT3G21140
AT3G21150	AT3G49260	AT3G32415	AT3G55280		AT3G21150
AT3G21380	AT3G49940	AT3G44110	AT3G55340		AT3G21380
AT3G21700	AT3G49990	AT3G44200	AT3G55350		AT3G21700
AT3G21720	AT3G50590	AT3G46090	AT3G55420		AT3G21720
AT3G21890	AT3G50740	AT3G46220	AT3G55450		AT3G21890
AT3G22090	AT3G51070	AT3G46230	AT3G55690		AT3G22090
AT3G22100	AT3G51075	AT3G46450	AT3G55740		AT3G22100
AT3G22370	AT3G51160	AT3G46600	AT3G56070		AT3G22370
AT3G22490	AT3G51238	AT3G47160	AT3G56370		AT3G22490
AT3G22830	AT3G51240	AT3G47550	AT3G56408		AT3G22830
AT3G22840	AT3G51920	AT3G47560	AT3G56410		AT3G22840
AT3G23000	AT3G51950	AT3G47875	AT3G56980		AT3G23000
AT3G23080	AT3G52170	AT3G48070	AT3G57120		AT3G23080
AT3G23150	AT3G52190	AT3G48240	AT3G57150		AT3G23150
AT3G23170	AT3G52310	AT3G48470	AT3G57157		AT3G23170
AT3G23910	AT3G52340	AT3G48475	AT3G57330		AT3G23910
AT3G23920	AT3G52500	AT3G48510	AT3G57490		AT3G23920
AT3G23990	AT3G52605	AT3G48520	AT3G57710		AT3G23990
AT3G24000	AT3G52640	AT3G48530	AT3G57965		AT3G24000
AT3G24070	AT3G52710	AT3G48580	AT3G57970		AT3G24070
AT3G24100	AT3G52740	AT3G48880	AT3G57980		AT3G24100
AT3G24500	AT3G52870	AT3G49160	AT3G58810		AT3G24500
AT3G25013	AT3G53240	AT3G49590	AT3G58850		AT3G25013
AT3G25110	AT3G53260	AT3G49780	AT3G58990		AT3G25110
AT3G25120	AT3G53460	AT3G49790	AT3G59140		AT3G25120
AT3G25230	AT3G53480	AT3G50260	AT3G59400		AT3G25230
AT3G25240	AT3G53730	AT3G50410	AT3G59410		AT3G25240
AT3G25495	AT3G54100	AT3G50480	AT3G59630		AT3G25495
AT3G26170	AT3G54220	AT3G50560	AT3G59670		AT3G26170
AT3G26180	AT3G54250	AT3G50930	AT3G59970		AT3G26180
AT3G26440	AT3G54280	AT3G51500	AT3G60110		AT3G26440
AT3G26450	AT3G54350	AT3G51520	AT3G60440		AT3G26450
AT3G26510	AT3G54400	AT3G51790	AT3G60450		AT3G26510
AT3G26740	AT3G54500	AT3G51910	AT3G60840		AT3G26740
AT3G26890	AT3G54600	AT3G51980	AT3G60960		AT3G26890
AT3G27025	AT3G54625	AT3G52530	AT3G60965		AT3G27025
AT3G27100	AT3G54630	AT3G52750	AT3G60980		AT3G27100
AT3G27150	AT3G54650	AT3G53030	AT3G61270		AT3G27150
AT3G27997	AT3G54830	AT3G53040	AT3G61460		AT3G27997
AT3G28210	AT3G54890	AT3G53230	AT3G61520		AT3G28210
AT3G28740	AT3G54990	AT3G53280	AT3G61580		AT3G28740
AT3G29575	AT3G55010	AT3G53403	AT3G61670		AT3G29575
AT3G29670	AT3G55110	AT3G53420	AT3G61750		AT3G29670
AT3G29810	AT3G55120	AT3G53630	AT3G61820		AT3G29810
AT3G30122	AT3G55130	AT3G53800	AT3G62250		AT3G30122
AT3G30460	AT3G55340	AT3G53830	AT3G62270		AT3G30460
AT3G32415	AT3G55350	AT3G54000	AT3G62460		AT3G32415
AT3G41762	AT3G55420	AT3G54820	AT3G62630		AT3G41762
AT3G44110	AT3G55510	AT3G54940	AT3G62650		AT3G44110
AT3G44190	AT3G55610	AT3G55090	AT3G62680		AT3G44190
AT3G44200	AT3G55690	AT3G55480	AT3G63030		AT3G44200
AT3G46090	AT3G55800	AT3G55580	AT3G63110		AT3G46090
AT3G46200	AT3G56120	AT3G56040	AT3G63160		AT3G46200
AT3G46220	AT3G56370	AT3G56320	AT3G63200		AT3G46220
AT3G46230	AT3G56408	AT3G56740	AT3G63380		AT3G46230
AT3G46580	AT3G56410	AT3G57540	AT3G63450		AT3G46580
AT3G46600	AT3G56870	AT3G57550	AT4G00110		AT3G46600
AT3G47160	AT3G57150	AT3G57760	AT4G00238		AT3G47160
AT3G47550	AT3G57157	AT3G57810	AT4G00310		AT3G47550
AT3G47680	AT3G57220	AT3G57880	AT4G00370		AT3G47680
AT3G47860	AT3G57330	AT3G58490	AT4G00880		AT3G47860
AT3G48070	AT3G57630	AT3G58620	AT4G00883		AT3G48070
AT3G48240	AT3G57660	AT3G59100	AT4G00930		AT3G48240
AT3G48470	AT3G58560	AT3G59280	AT4G01080		AT3G48470
AT3G48475	AT3G58790	AT3G59430	AT4G01870		AT3G48475
AT3G48510	AT3G58810	AT3G59520	AT4G02050		AT3G48510
AT3G48520	AT3G58990	AT3G59530	AT4G02330		AT3G48520
AT3G48530	AT3G59140	AT3G59720	AT4G02540		AT3G48530
AT3G49160	AT3G59400	AT3G59730	AT4G02680		AT3G49160
AT3G49570	AT3G59410	AT3G59820	AT4G02770		AT3G49570
AT3G49590	AT3G59670	AT3G60130	AT4G02800		AT3G49590
AT3G49780	AT3G59970	AT3G60190	AT4G02820		AT3G49780
AT3G49790	AT3G60110	AT3G60220	AT4G03060		AT3G49790
AT3G50060	AT3G60620	AT3G60300	AT4G03550		AT3G50060
AT3G50260	AT3G60740	AT3G60720	AT4G04570		AT3G50260
AT3G50400	AT3G60750	AT3G60930	AT4G04610		AT3G50400
AT3G50410	AT3G60840	AT3G61020	AT4G04840		AT3G50410
AT3G50480	AT3G60860	AT3G61060	AT4G05180		AT3G50480
AT3G50830	AT3G60900	AT3G61180	AT4G05190		AT3G50830
AT3G50840	AT3G61280	AT3G61320	AT4G05200		AT3G50840
AT3G50910	AT3G61310	AT3G61330	AT4G05400		AT3G50910
AT3G50940	AT3G61460	AT3G61630	AT4G06105		AT3G50940
AT3G50970	AT3G61470	AT3G62260	AT4G06744		AT3G50970
AT3G50980	AT3G61490	AT3G62560	AT4G07410		AT3G50980
AT3G51500	AT3G61580	AT3G62600	AT4G08035		AT3G51500
AT3G51520	AT3G61820	AT3G62770	AT4G08810		AT3G51520
AT3G51530	AT3G61880	AT3G62780	AT4G08850		AT3G51530
AT3G51790	AT3G61930	AT3G62990	AT4G09320		AT3G51790
AT3G51810	AT3G62270	AT3G63060	AT4G09420		AT3G51810
AT3G51910	AT3G62460	AT3G63150	AT4G09500		AT3G51910
AT3G51980	AT3G62650	AT3G63180	AT4G09510		AT3G51980
AT3G53030	AT3G62700	AT3G63300	AT4G09805		AT3G53030
AT3G53040	AT3G63110	AT3G63310	AT4G09970		AT3G53040
AT3G53230	AT3G63200	AT3G63340	AT4G10340		AT3G53230
AT3G53280	AT3G63470	AT3G63350	AT4G10380		AT3G53280
AT3G53830	AT4G00050	AT3G63440	AT4G10480		AT3G53830
AT3G53990	AT4G00110	AT4G00550	AT4G11190		AT3G53990
AT3G54000	AT4G00150	AT4G00670	AT4G11320		AT3G54000
AT3G54940	AT4G00370	AT4G00760	AT4G11420		AT3G54940
AT3G55090	AT4G00710	AT4G00770	AT4G11850		AT3G55090
AT3G55480	AT4G00750	AT4G00900	AT4G12030		AT3G55480
AT3G55580	AT4G00820	AT4G00940	AT4G12110		AT3G55580
AT3G56200	AT4G01080	AT4G01026	AT4G12320		AT3G56200
AT3G56250	AT4G01090	AT4G01030	AT4G12510		AT3G56250
AT3G56275	AT4G01390	AT4G01037	AT4G12520		AT3G56275
AT3G56320	AT4G01430	AT4G01120	AT4G12640		AT3G56320
AT3G56740	AT4G01740	AT4G01550	AT4G12730		AT3G56740
AT3G57540	AT4G01920	AT4G02210	AT4G12800		AT3G57540
AT3G57550	AT4G02060	AT4G02425	AT4G12980		AT3G57550
AT3G57670	AT4G02110	AT4G02440	AT4G13350		AT3G57670
AT3G57810	AT4G02330	AT4G02550	AT4G13495		AT3G57810
AT3G57880	AT4G02660	AT4G02650	AT4G13560		AT3G57880
AT3G58450	AT4G02680	AT4G02815	AT4G13570		AT3G58450
AT3G58490	AT4G02770	AT4G02920	AT4G13577		AT3G58490
AT3G58620	AT4G02820	AT4G02980	AT4G13770		AT3G58620
AT3G59280	AT4G02940	AT4G02990	AT4G13840		AT3G59280
AT3G59350	AT4G03060	AT4G03030	AT4G13930		AT3G59350
AT3G59430	AT4G03200	AT4G03320	AT4G13940		AT3G59430
AT3G59520	AT4G03550	AT4G03430	AT4G13990		AT3G59520
AT3G59530	AT4G03725	AT4G03845	AT4G14010		AT3G59530
AT3G59720	AT4G04570	AT4G03930	AT4G14230		AT3G59720
AT3G59730	AT4G04840	AT4G03940	AT4G14330		AT3G59730
AT3G59930	AT4G04850	AT4G04020	AT4G14360		AT3G59930
AT3G60130	AT4G05180	AT4G04025	AT4G14440		AT3G60130
AT3G60190	AT4G05200	AT4G04335	AT4G14465		AT3G60190
AT3G60220	AT4G06665	AT4G05020	AT4G14480		AT3G60220
AT3G60250	AT4G07400	AT4G05070	AT4G14560		AT3G60250
AT3G60300	AT4G07410	AT4G05100	AT4G14605		AT3G60300
AT3G60520	AT4G07825	AT4G05910	AT4G14690		AT3G60520
AT3G60720	AT4G08295	AT4G06745	AT4G15000		AT3G60720
AT3G60930	AT4G08850	AT4G06746	AT4G15450		AT3G60930
AT3G61020	AT4G09160	AT4G06995	AT4G15810		AT3G61020
AT3G61060	AT4G09225	AT4G07030	AT4G15830		AT3G61060
AT3G61180	AT4G09310	AT4G08230	AT4G16120		AT3G61180
AT3G61320	AT4G09510	AT4G08555	AT4G16210		AT3G61320
AT3G61330	AT4G09650	AT4G08590	AT4G16250		AT3G61330
AT3G61630	AT4G09970	AT4G08815	AT4G16260		AT3G61630
AT3G61790	AT4G10060	AT4G09150	AT4G16370		AT3G61790
AT3G61900	AT4G10120	AT4G09845	AT4G16470		AT3G61900
AT3G62260	AT4G10150	AT4G10040	AT4G16563		AT3G62260
AT3G62560	AT4G10340	AT4G10070	AT4G16750		AT3G62560
AT3G62590	AT4G10510	AT4G10110	AT4G16880		AT3G62590
AT3G62600	AT4G10550	AT4G10250	AT4G16980		AT3G62600
AT3G62770	AT4G10690	AT4G10330	AT4G16983		AT3G62770
AT3G62780	AT4G11320	AT4G10925	AT4G17090		AT3G62780
AT3G62990	AT4G11420	AT4G11220	AT4G17180		AT3G62990
AT3G63050	AT4G12030	AT4G11660	AT4G17490		AT3G63050
AT3G63060	AT4G12110	AT4G11670	AT4G17520		AT3G63060
AT3G63300	AT4G12320	AT4G11740	AT4G17680		AT3G63300
AT3G63310	AT4G12390	AT4G11845	AT4G17770		AT3G63310
AT3G63350	AT4G12510	AT4G11960	AT4G17800		AT3G63350
AT3G63440	AT4G12520	AT4G12050	AT4G17870		AT3G63440
AT3G63445	AT4G12620	AT4G12400	AT4G17880		AT3G63445
AT4G00090	AT4G12730	AT4G12410	AT4G18030		AT4G00090
AT4G00550	AT4G12800	AT4G12530	AT4G18100		AT4G00550
AT4G00670	AT4G12830	AT4G12570	AT4G18197		AT4G00670
AT4G00760	AT4G13235	AT4G12690	AT4G18390		AT4G00760
AT4G00770	AT4G13350	AT4G12750	AT4G19030		AT4G00770
AT4G00940	AT4G13370	AT4G13110	AT4G19110		AT4G00940
AT4G01026	AT4G13495	AT4G13550	AT4G19120		AT4G01026
AT4G01030	AT4G13770	AT4G13620	AT4G19160		AT4G01030
AT4G01037	AT4G13840	AT4G13830	AT4G19380		AT4G01037
AT4G01120	AT4G13930	AT4G13900	AT4G19460		AT4G01120
AT4G01320	AT4G13940	AT4G14070	AT4G19690		AT4G01320
AT4G01360	AT4G13950	AT4G14130	AT4G20000		AT4G01360
AT4G01550	AT4G13990	AT4G14270	AT4G20240		AT4G01550
AT4G02005	AT4G14040	AT4G14300	AT4G20260		AT4G02005
AT4G02210	AT4G14330	AT4G14385	AT4G20300		AT4G02210
AT4G02380	AT4G14360	AT4G15248	AT4G20780		AT4G02380
AT4G02425	AT4G14400	AT4G15410	AT4G20860		AT4G02425
AT4G02430	AT4G14465	AT4G15420	AT4G21670		AT4G02430
AT4G02550	AT4G14480	AT4G15530	AT4G21740		AT4G02550
AT4G02690	AT4G14560	AT4G15540	AT4G21900		AT4G02690
AT4G02815	AT4G14760	AT4G15660	AT4G21910		AT4G02815
AT4G02920	AT4G14940	AT4G15680	AT4G21960		AT4G02920
AT4G02980	AT4G15393	AT4G15760	AT4G21990		AT4G02980
AT4G03030	AT4G15440	AT4G15780	AT4G22010		AT4G03030
AT4G03320	AT4G15450	AT4G15930	AT4G22070		AT4G03320
AT4G03420	AT4G15500	AT4G16500	AT4G22190		AT4G03420
AT4G03430	AT4G15830	AT4G16660	AT4G22320		AT4G03430
AT4G03930	AT4G16120	AT4G17230	AT4G22690		AT4G03930
AT4G03940	AT4G16250	AT4G17245	AT4G23020		AT4G03940
AT4G03960	AT4G16260	AT4G17250	AT4G23290		AT4G03960
AT4G04020	AT4G16340	AT4G17970	AT4G23800		AT4G04020
AT4G04025	AT4G16360	AT4G18280	AT4G23820		AT4G04025
AT4G05010	AT4G16370	AT4G18450	AT4G23990		AT4G05010
AT4G05020	AT4G16563	AT4G18700	AT4G24530		AT4G05020
AT4G05070	AT4G16566	AT4G19430	AT4G24780		AT4G05070
AT4G05100	AT4G16890	AT4G19660	AT4G25050		AT4G05100
AT4G05150	AT4G16980	AT4G19860	AT4G25320		AT4G05150
AT4G05395	AT4G16983	AT4G20020	AT4G25630		AT4G05395
AT4G05910	AT4G16990	AT4G20380	AT4G25640		AT4G05910
AT4G06746	AT4G17090	AT4G21020	AT4G25780		AT4G06746
AT4G06995	AT4G17520	AT4G21090	AT4G25790		AT4G06995
AT4G07030	AT4G17570	AT4G21110	AT4G25890		AT4G07030
AT4G08230	AT4G17770	AT4G21310	AT4G26010		AT4G08230
AT4G08320	AT4G17810	AT4G21320	AT4G26130		AT4G08320
AT4G08570	AT4G17870	AT4G21323	AT4G26190		AT4G08570
AT4G08590	AT4G17880	AT4G21440	AT4G26660		AT4G08590
AT4G08825	AT4G18030	AT4G21580	AT4G26850		AT4G08825
AT4G09080	AT4G18372	AT4G21810	AT4G27050		AT4G09080
AT4G09150	AT4G18390	AT4G21880	AT4G27230		AT4G09150
AT4G09560	AT4G18570	AT4G21980	AT4G27270		AT4G09560
AT4G09845	AT4G18630	AT4G22240	AT4G27360		AT4G09845
AT4G10040	AT4G18670	AT4G22340	AT4G27520		AT4G10040
AT4G10110	AT4G18890	AT4G22350	AT4G27560		AT4G10110
AT4G10250	AT4G19030	AT4G22670	AT4G28080		AT4G10250
AT4G10330	AT4G19120	AT4G22740	AT4G28250		AT4G10330
AT4G10500	AT4G19185	AT4G22990	AT4G28490		AT4G10500
AT4G11220	AT4G19370	AT4G23040	AT4G28550		AT4G11220
AT4G11240	AT4G19380	AT4G23050	AT4G28750		AT4G11240
AT4G11660	AT4G19690	AT4G23493	AT4G28755		AT4G11660
AT4G11670	AT4G20240	AT4G23570	AT4G28780		AT4G11670
AT4G11740	AT4G20270	AT4G23680	AT4G28940		AT4G11740
AT4G11960	AT4G20360	AT4G23885	AT4G29020		AT4G11960
AT4G12000	AT4G20362	AT4G23900	AT4G29120		AT4G12000
AT4G12050	AT4G20460	AT4G24020	AT4G29260		AT4G12050
AT4G12120	AT4G20780	AT4G24190	AT4G29700		AT4G12120
AT4G12400	AT4G20860	AT4G24280	AT4G29720		AT4G12400
AT4G12410	AT4G20940	AT4G24410	AT4G29740		AT4G12410
AT4G12530	AT4G21670	AT4G24413	AT4G30020		AT4G12530
AT4G12690	AT4G21900	AT4G24415	AT4G30170		AT4G12690
AT4G12720	AT4G21910	AT4G25130	AT4G30190		AT4G12720
AT4G13110	AT4G21960	AT4G25200	AT4G30340		AT4G13110
AT4G13180	AT4G22190	AT4G25210	AT4G30530		AT4G13180
AT4G13520	AT4G22540	AT4G25220	AT4G30610		AT4G13520
AT4G13550	AT4G22570	AT4G25225	AT4G30650		AT4G13550
AT4G13620	AT4G22580	AT4G25340	AT4G30670		AT4G13620
AT4G13830	AT4G22610	AT4G25380	AT4G30760		AT4G13830
AT4G13900	AT4G22810	AT4G25520	AT4G30850		AT4G13900
AT4G14270	AT4G23020	AT4G25580	AT4G30960		AT4G14270
AT4G14300	AT4G23290	AT4G25690	AT4G31500		AT4G14300
AT4G14385	AT4G23800	AT4G25810	AT4G31590		AT4G14385
AT4G14746	AT4G23990	AT4G25990	AT4G31700		AT4G14746
AT4G14819	AT4G24460	AT4G26200	AT4G31840		AT4G14819
AT4G14820	AT4G24570	AT4G26270	AT4G31910		AT4G14820
AT4G15248	AT4G24780	AT4G26500	AT4G31920		AT4G15248
AT4G15280	AT4G25050	AT4G26510	AT4G32290		AT4G15280
AT4G15410	AT4G25270	AT4G26700	AT4G32460		AT4G15410
AT4G15420	AT4G25320	AT4G26770	AT4G32680		AT4G15420
AT4G15490	AT4G25630	AT4G26780	AT4G33050		AT4G15490
AT4G15540	AT4G25640	AT4G26990	AT4G33220		AT4G15540
AT4G15660	AT4G25780	AT4G27020	AT4G33300		AT4G15660
AT4G15680	AT4G25960	AT4G27260	AT4G33400		AT4G15680
AT4G15760	AT4G26530	AT4G27370	AT4G33625		AT4G15760
AT4G15780	AT4G26540	AT4G27410	AT4G33790		AT4G15780
AT4G15880	AT4G26542	AT4G27450	AT4G34050		AT4G15880
AT4G15930	AT4G26850	AT4G27460	AT4G34550		AT4G15930
AT4G16500	AT4G26860	AT4G27652	AT4G34610		AT4G16500
AT4G16660	AT4G27230	AT4G27660	AT4G34710		AT4G16660
AT4G17230	AT4G27240	AT4G27670	AT4G34730		AT4G17230
AT4G17245	AT4G27520	AT4G27680	AT4G34740		AT4G17245
AT4G17250	AT4G27560	AT4G27940	AT4G34870		AT4G17250
AT4G17615	AT4G27595	AT4G28020	AT4G34881		AT4G17615
AT4G17730	AT4G27860	AT4G28140	AT4G34950		AT4G17730
AT4G17970	AT4G28080	AT4G28150	AT4G34960		AT4G17970
AT4G18140	AT4G28250	AT4G28270	AT4G34980		AT4G18140
AT4G18270	AT4G28310	AT4G28300	AT4G35030		AT4G18270
AT4G18280	AT4G28750	AT4G28390	AT4G35060		AT4G18280
AT4G18450	AT4G28780	AT4G28480	AT4G35160		AT4G18450
AT4G18700	AT4G28940	AT4G29070	AT4G35260		AT4G18700
AT4G18830	AT4G29020	AT4G29330	AT4G35310		AT4G18830
AT4G19430	AT4G29030	AT4G29340	AT4G35320		AT4G19430
AT4G19860	AT4G29060	AT4G29360	AT4G35570		AT4G19860
AT4G20020	AT4G29700	AT4G29520	AT4G35630		AT4G20020
AT4G20870	AT4G29720	AT4G29670	AT4G36020		AT4G20870
AT4G21020	AT4G30000	AT4G29770	AT4G36090		AT4G21020
AT4G21090	AT4G30020	AT4G29880	AT4G36130		AT4G21090
AT4G21110	AT4G30080	AT4G29905	AT4G36220		AT4G21110
AT4G21310	AT4G30160	AT4G29930	AT4G36500		AT4G21310
AT4G21320	AT4G30170	AT4G30390	AT4G36640		AT4G21320
AT4G21323	AT4G30190	AT4G30460	AT4G36670		AT4G21323
AT4G21440	AT4G30340	AT4G30490	AT4G36920		AT4G21440
AT4G21580	AT4G30530	AT4G30940	AT4G37070		AT4G21580
AT4G21810	AT4G30610	AT4G31370	AT4G37210		AT4G21810
AT4G21980	AT4G30650	AT4G31380	AT4G37300		AT4G21980
AT4G22240	AT4G30825	AT4G31405	AT4G37430		AT4G22240
AT4G22340	AT4G30850	AT4G31670	AT4G37432		AT4G22340
AT4G22350	AT4G31500	AT4G32050	AT4G37520		AT4G22350
AT4G22670	AT4G31590	AT4G32190	AT4G37630		AT4G22670
AT4G22740	AT4G31650	AT4G32208	AT4G37640		AT4G22740
AT4G22780	AT4G31770	AT4G32212	AT4G38550		AT4G22780
AT4G23040	AT4G31805	AT4G32250	AT4G38552		AT4G23040
AT4G23493	AT4G31840	AT4G32480	AT4G38620		AT4G23493
AT4G23550	AT4G31910	AT4G32590	AT4G38680		AT4G23550
AT4G23570	AT4G31920	AT4G32610	AT4G38770		AT4G23570
AT4G23680	AT4G32330	AT4G33465	AT4G38950		AT4G23680
AT4G23870	AT4G32460	AT4G33467	AT4G38970		AT4G23870
AT4G23885	AT4G32570	AT4G33610	AT4G39260		AT4G23885
AT4G24020	AT4G32640	AT4G33660	AT4G39320		AT4G24020
AT4G24190	AT4G32700	AT4G33666	AT4G39330		AT4G24190
AT4G24240	AT4G32920	AT4G33905	AT4G39730		AT4G24240
AT4G24280	AT4G33010	AT4G33940	AT4G39800		AT4G24280
AT4G24410	AT4G33200	AT4G34150	AT4G39940		AT4G24410
AT4G24413	AT4G33220	AT4G34230	AT4G39950		AT4G24413
AT4G24415	AT4G33400	AT4G34310	AT4G39960		AT4G24415
AT4G24420	AT4G33740	AT4G34370	AT4G39980		AT4G24420
AT4G24730	AT4G34050	AT4G34480	AT4G39990		AT4G24730
AT4G25130	AT4G34220	AT4G34530	AT4G40030		AT4G25130
AT4G25200	AT4G34550	AT4G34560	AT4G40040		AT4G25200
AT4G25220	AT4G34610	AT4G35290	AT4G40090		AT4G25220
AT4G25225	AT4G34710	AT4G35440	AT5G01015		AT4G25225
AT4G25340	AT4G34730	AT4G35690	AT5G01017		AT4G25340
AT4G25380	AT4G34740	AT4G35860	AT5G01075		AT4G25380
AT4G25550	AT4G34881	AT4G35985	AT5G01295		AT4G25550
AT4G25580	AT4G34960	AT4G36010	AT5G01530		AT4G25580
AT4G25670	AT4G34980	AT4G36040	AT5G01790		AT4G25670
AT4G25690	AT4G35090	AT4G36280	AT5G01810		AT4G25690
AT4G25810	AT4G35160	AT4G36490	AT5G02190		AT4G25810
AT4G25990	AT4G35380	AT4G36600	AT5G02260		AT4G25990
AT4G26080	AT4G35510	AT4G36740	AT5G02270		AT4G26080
AT4G26160	AT4G35930	AT4G36910	AT5G02400		AT4G26160
AT4G26200	AT4G36020	AT4G36990	AT5G02480		AT4G26200
AT4G26270	AT4G36220	AT4G37250	AT5G02670		AT4G26270
AT4G26400	AT4G36230	AT4G37370	AT5G02890		AT4G26400
AT4G26500	AT4G36380	AT4G38020	AT5G03490		AT4G26500
AT4G26510	AT4G36470	AT4G38030	AT5G03610		AT4G26510
AT4G26770	AT4G36500	AT4G38060	AT5G03850		AT4G26770
AT4G26780	AT4G36540	AT4G38940	AT5G04510		AT4G26780
AT4G26990	AT4G36670	AT4G39110	AT5G04800		AT4G26990
AT4G27020	AT4G36890	AT4G39235	AT5G04820		AT4G27020
AT4G27130	AT4G37210	AT4G39360	AT5G04870		AT4G27130
AT4G27260	AT4G37310	AT4G39361	AT5G04880		AT4G27260
AT4G27350	AT4G37409	AT4G39363	AT5G04905		AT4G27350
AT4G27370	AT4G37410	AT4G39364	AT5G04950		AT4G27370
AT4G27410	AT4G37980	AT4G39366	AT5G04960		AT4G27410
AT4G27450	AT4G38062	AT4G39370	AT5G05180		AT4G27450
AT4G27460	AT4G38120	AT4G39520	AT5G05250		AT4G27460
AT4G27530	AT4G38200	AT4G39700	AT5G05270		AT4G27530
AT4G27580	AT4G38300	AT5G00365	AT5G05590		AT4G27580
AT4G27652	AT4G38550	AT5G00965	AT5G05890		AT4G27652
AT4G27657	AT4G38552	AT5G00980	AT5G05990		AT4G27657
AT4G27660	AT4G38660	AT5G00985	AT5G06110		AT4G27660
AT4G27670	AT4G38680	AT5G00990	AT5G06270		AT4G27670
AT4G27680	AT4G38770	AT5G01180	AT5G06460		AT4G27680
AT4G27830	AT4G38775	AT5G01350	AT5G06530		AT4G27830
AT4G27840	AT4G38850	AT5G01380	AT5G06790		AT4G27840
AT4G27940	AT4G38950	AT5G01390	AT5G06860		AT4G27940
AT4G28140	AT4G38970	AT5G01490	AT5G06865		AT4G28140
AT4G28150	AT4G39120	AT5G01520	AT5G07110		AT4G28150
AT4G28390	AT4G39260	AT5G01595	AT5G07320		AT4G28390
AT4G28480	AT4G39320	AT5G01600	AT5G07440		AT4G28480
AT4G29070	AT4G39350	AT5G01740	AT5G07580		AT4G29070
AT4G29330	AT4G39800	AT5G01765	AT5G07590		AT4G29330
AT4G29340	AT4G39940	AT5G01815	AT5G07840		AT4G29340
AT4G29360	AT4G39950	AT5G01980	AT5G08020		AT4G29360
AT4G29520	AT4G39960	AT5G01990	AT5G08180		AT4G29520
AT4G29770	AT4G39980	AT5G02020	AT5G08640		AT4G29770
AT4G29820	AT4G39990	AT5G02170	AT5G09350		AT4G29820
AT4G29880	AT4G40030	AT5G02230	AT5G09510		AT4G29880
AT4G29905	AT5G01015	AT5G02320	AT5G09760		AT4G29905
AT4G29930	AT5G01017	AT5G02415	AT5G09850		AT4G29930
AT4G30110	AT5G01050	AT5G02430	AT5G09870		AT4G30110
AT4G30240	AT5G01170	AT5G02460	AT5G10130		AT4G30240
AT4G30390	AT5G01410	AT5G02490	AT5G10230		AT4G30390
AT4G30460	AT5G01530	AT5G02875	AT5G10390		AT4G30460
AT4G30490	AT5G01780	AT5G03030	AT5G10400		AT4G30490
AT4G30940	AT5G01790	AT5G03160	AT5G10430		AT4G30940
AT4G31290	AT5G01810	AT5G03195	AT5G10435		AT4G31290
AT4G31354	AT5G01890	AT5G03210	AT5G10520		AT4G31354
AT4G31380	AT5G02260	AT5G03245	AT5G10580		AT4G31380
AT4G31670	AT5G02270	AT5G03285	AT5G10830		AT4G31670
AT4G32208	AT5G02480	AT5G03330	AT5G10980		AT4G32208
AT4G32212	AT5G02710	AT5G03340	AT5G11000		AT4G32212
AT4G32450	AT5G02720	AT5G03350	AT5G11150		AT4G32450
AT4G32480	AT5G02890	AT5G03370	AT5G11160		AT4G32480
AT4G32590	AT5G03140	AT5G03380	AT5G11230		AT4G32590
AT4G32610	AT5G03375	AT5G03450	AT5G11420		AT4G32610
AT4G32910	AT5G03490	AT5G03560	AT5G11590		AT4G32910
AT4G33040	AT5G03610	AT5G03720	AT5G11710		AT4G33040
AT4G33465	AT5G03800	AT5G03740	AT5G11790		AT4G33465
AT4G33467	AT5G03985	AT5G03975	AT5G11970		AT4G33467
AT4G33610	AT5G04020	AT5G03990	AT5G11975		AT4G33610
AT4G33660	AT5G04140	AT5G04250	AT5G11980		AT4G33660
AT4G33905	AT5G04230	AT5G04340	AT5G12150		AT4G33905
AT4G33940	AT5G04590	AT5G04380	AT5G12940		AT4G33940
AT4G34230	AT5G04620	AT5G04410	AT5G13420		AT4G34230
AT4G34240	AT5G04905	AT5G04610	AT5G13460		AT4G34240
AT4G34560	AT5G04950	AT5G04750	AT5G13470		AT4G34560
AT4G35290	AT5G04960	AT5G04760	AT5G13740		AT4G35290
AT4G35690	AT5G05170	AT5G04770	AT5G13930		AT4G35690
AT4G35840	AT5G05180	AT5G04840	AT5G14140		AT4G35840
AT4G35860	AT5G05250	AT5G04890	AT5G14200		AT4G35860
AT4G35985	AT5G05270	AT5G04940	AT5G14930		AT4G35985
AT4G36010	AT5G05580	AT5G04980	AT5G15130		AT4G36010
AT4G36040	AT5G05890	AT5G05220	AT5G15410		AT4G36040
AT4G36600	AT5G05990	AT5G05410	AT5G15490		AT4G36600
AT4G36720	AT5G06060	AT5G05480	AT5G15650		AT4G36720
AT4G36860	AT5G06150	AT5G05800	AT5G15950		AT4G36860
AT4G36880	AT5G06180	AT5G06155	AT5G16070		AT4G36880
AT4G36900	AT5G06430	AT5G06280	AT5G16230		AT4G36900
AT4G36990	AT5G06790	AT5G06290	AT5G16235		AT4G36990
AT4G37180	AT5G07030	AT5G07000	AT5G16440		AT4G37180
AT4G37250	AT5G07110	AT5G07330	AT5G16510		AT4G37250
AT4G37260	AT5G07150	AT5G07515	AT5G16730		AT4G37260
AT4G37370	AT5G07152	AT5G08135	AT5G16760		AT4G37370
AT4G37530	AT5G07180	AT5G08175	AT5G16910		AT4G37530
AT4G38020	AT5G07300	AT5G08250	AT5G17050		AT4G38020
AT4G38060	AT5G07680	AT5G08380	AT5G17580		AT4G38060
AT4G38560	AT5G07690	AT5G08535	AT5G17800		AT4G38560
AT4G38580	AT5G07940	AT5G08920	AT5G17820		AT4G38580
AT4G38730	AT5G08020	AT5G09440	AT5G17920		AT4G38730
AT4G39030	AT5G08600	AT5G09565	AT5G18070		AT4G39030
AT4G39110	AT5G08640	AT5G09590	AT5G18250		AT4G39110
AT4G39235	AT5G09315	AT5G09610	AT5G18255		AT4G39235
AT4G39340	AT5G09460	AT5G09785	AT5G18260		AT4G39340
AT4G39360	AT5G09520	AT5G09855	AT5G18280		AT4G39360
AT4G39361	AT5G09760	AT5G09930	AT5G18310		AT4G39361
AT4G39363	AT5G09850	AT5G10120	AT5G18380		AT4G39363
AT4G39364	AT5G09870	AT5G10300	AT5G19040		AT4G39364
AT4G39366	AT5G10020	AT5G10550	AT5G19090		AT4G39366
AT4G39370	AT5G10390	AT5G10695	AT5G19230		AT4G39370
AT4G39520	AT5G10400	AT5G10700	AT5G19250		AT4G39520
AT4G39675	AT5G10470	AT5G10710	AT5G19770		AT4G39675
AT4G39700	AT5G10520	AT5G10720	AT5G19980		AT4G39700
AT4G40010	AT5G10580	AT5G10800	AT5G20180		AT4G40010
AT5G00365	AT5G10770	AT5G10870	AT5G20190		AT5G00365
AT5G00590	AT5G10840	AT5G10946	AT5G20290		AT5G00590
AT5G00965	AT5G11230	AT5G11090	AT5G20400		AT5G00965
AT5G00980	AT5G11670	AT5G11100	AT5G20540		AT5G00980
AT5G00985	AT5G11710	AT5G11110	AT5G20700		AT5G00985
AT5G00990	AT5G11790	AT5G11340	AT5G20790		AT5G00990
AT5G01175	AT5G12150	AT5G11350	AT5G20885		AT5G01175
AT5G01180	AT5G12850	AT5G11680	AT5G21100		AT5G01180
AT5G01200	AT5G13000	AT5G11730	AT5G22130		AT5G01200
AT5G01300	AT5G13460	AT5G12020	AT5G22580		AT5G01300
AT5G01350	AT5G13630	AT5G12030	AT5G22630		AT5G01350
AT5G01380	AT5G13650	AT5G12040	AT5G22740		AT5G01380
AT5G01390	AT5G13730	AT5G12080	AT5G22880		AT5G01390
AT5G01450	AT5G13740	AT5G12110	AT5G23100		AT5G01450
AT5G01520	AT5G13930	AT5G12120	AT5G23235		AT5G01520
AT5G01740	AT5G14130	AT5G12900	AT5G23240		AT5G01740
AT5G01765	AT5G14200	AT5G13080	AT5G23280		AT5G01765
AT5G01815	AT5G14230	AT5G13150	AT5G23420		AT5G01815
AT5G01980	AT5G15400	AT5G13170	AT5G23530		AT5G01980
AT5G01990	AT5G15410	AT5G13190	AT5G23575		AT5G01990
AT5G02020	AT5G15470	AT5G13200	AT5G23730		AT5G02020
AT5G02170	AT5G15490	AT5G13205	AT5G23760		AT5G02170
AT5G02230	AT5G15650	AT5G13210	AT5G23980		AT5G02230
AT5G02320	AT5G15790	AT5G13240	AT5G24165		AT5G02320
AT5G02415	AT5G15950	AT5G13310	AT5G24850		AT5G02415
AT5G02430	AT5G15980	AT5G13580	AT5G25210		AT5G02430
AT5G02490	AT5G16030	AT5G13760	AT5G25460		AT5G02490
AT5G02502	AT5G16910	AT5G13820	AT5G25510		AT5G02502
AT5G02810	AT5G17050	AT5G13880	AT5G25610		AT5G02810
AT5G03030	AT5G17160	AT5G13920	AT5G25890		AT5G03030
AT5G03160	AT5G17700	AT5G14020	AT5G26230		AT5G03160
AT5G03180	AT5G17800	AT5G14510	AT5G26290		AT5G03180
AT5G03195	AT5G17920	AT5G14515	AT5G26622		AT5G03195
AT5G03210	AT5G18070	AT5G14810	AT5G26710		AT5G03210
AT5G03245	AT5G18430	AT5G14890	AT5G26780		AT5G03245
AT5G03285	AT5G18550	AT5G15090	AT5G26850		AT5G03285
AT5G03330	AT5G19040	AT5G15250	AT5G27120		AT5G03330
AT5G03340	AT5G19090	AT5G15290	AT5G28300		AT5G03340
AT5G03370	AT5G19230	AT5G15330	AT5G28500		AT5G03370
AT5G03380	AT5G19240	AT5G15340	AT5G28626		AT5G03380
AT5G03440	AT5G19260	AT5G15350	AT5G28913		AT5G03440
AT5G03545	AT5G19310	AT5G15420	AT5G28919		AT5G03545
AT5G03560	AT5G19770	AT5G15430	AT5G28920		AT5G03560
AT5G03720	AT5G20700	AT5G15440	AT5G33290		AT5G03720
AT5G03740	AT5G20790	AT5G15450	AT5G35970		AT5G03740
AT5G03975	AT5G21100	AT5G15860	AT5G36130		AT5G03975
AT5G03990	AT5G21482	AT5G15960	AT5G37010		AT5G03990
AT5G03995	AT5G22130	AT5G16110	AT5G37550		AT5G03995
AT5G04010	AT5G22300	AT5G16260	AT5G37990		AT5G04010
AT5G04080	AT5G22320	AT5G16380	AT5G38010		AT5G04080
AT5G04250	AT5G22580	AT5G16550	AT5G38020		AT5G04250
AT5G04340	AT5G22630	AT5G16900	AT5G38210		AT5G04340
AT5G04370	AT5G22740	AT5G17270	AT5G38212		AT5G04370
AT5G04380	AT5G23010	AT5G17310	AT5G38430		AT5G04380
AT5G04410	AT5G23020	AT5G17350	AT5G38910		AT5G04410
AT5G04610	AT5G23060	AT5G17360	AT5G39250		AT5G04610
AT5G04750	AT5G23420	AT5G17400	AT5G39320		AT5G04750
AT5G04760	AT5G23530	AT5G17680	AT5G39740		AT5G04760
AT5G04840	AT5G23730	AT5G17760	AT5G39760		AT5G04840
AT5G04890	AT5G23760	AT5G17850	AT5G39900		AT5G04890
AT5G04940	AT5G23920	AT5G18040	AT5G40200		AT5G04940
AT5G04980	AT5G24990	AT5G18065	AT5G40450		AT5G04980
AT5G05220	AT5G25010	AT5G18100	AT5G40780		AT5G05220
AT5G05410	AT5G25460	AT5G18130	AT5G41020		AT5G05410
AT5G05480	AT5G25980	AT5G18340	AT5G41025		AT5G05480
AT5G06278	AT5G26000	AT5G18420	AT5G41140		AT5G06278
AT5G06280	AT5G26230	AT5G18450	AT5G41190		AT5G06280
AT5G06290	AT5G26290	AT5G18630	AT5G41410		AT5G06290
AT5G06395	AT5G26780	AT5G18670	AT5G41670		AT5G06395
AT5G06710	AT5G26850	AT5G18700	AT5G41920		AT5G06710
AT5G06750	AT5G27030	AT5G18705	AT5G42090		AT5G06750
AT5G06760	AT5G27120	AT5G18850	AT5G42092		AT5G06760
AT5G07000	AT5G28290	AT5G18980	AT5G42100		AT5G07000
AT5G07330	AT5G28500	AT5G19110	AT5G42240		AT5G07330
AT5G07515	AT5G28840	AT5G19480	AT5G42270		AT5G07515
AT5G08135	AT5G28919	AT5G19870	AT5G42280		AT5G08135
AT5G08175	AT5G28920	AT5G19875	AT5G42440		AT5G08175
AT5G08380	AT5G33290	AT5G20020	AT5G42830		AT5G08380
AT5G08520	AT5G35970	AT5G20060	AT5G42860		AT5G08520
AT5G08535	AT5G36130	AT5G20720	AT5G42930		AT5G08535
AT5G08920	AT5G36140	AT5G20830	AT5G43350		AT5G08920
AT5G09440	AT5G36220	AT5G20910	AT5G43880		AT5G09440
AT5G09565	AT5G36930	AT5G21170	AT5G44280		AT5G09565
AT5G09590	AT5G37010	AT5G21940	AT5G44320		AT5G09590
AT5G09610	AT5G37020	AT5G22050	AT5G44380		AT5G09610
AT5G09785	AT5G37130	AT5G22060	AT5G44390		AT5G09785
AT5G09855	AT5G38010	AT5G23050	AT5G44550		AT5G09855
AT5G09920	AT5G38020	AT5G23340	AT5G44565		AT5G09920
AT5G09930	AT5G38040	AT5G23380	AT5G44750		AT5G09930
AT5G09960	AT5G38210	AT5G23480	AT5G44930		AT5G09960
AT5G10120	AT5G38212	AT5G23590	AT5G45070		AT5G10120
AT5G10300	AT5G38410	AT5G24060	AT5G45080		AT5G10300
AT5G10695	AT5G38420	AT5G24080	AT5G45280		AT5G10695
AT5G10700	AT5G38430	AT5G24150	AT5G45510		AT5G10700
AT5G10710	AT5G38590	AT5G24155	AT5G45600		AT5G10710
AT5G10870	AT5G38980	AT5G24210	AT5G45700		AT5G10870
AT5G10946	AT5G39320	AT5G24340	AT5G45775		AT5G10946
AT5G11090	AT5G39570	AT5G24800	AT5G46330		AT5G11090
AT5G11100	AT5G39710	AT5G25130	AT5G46510		AT5G11100
AT5G11110	AT5G39860	AT5G25140	AT5G46520		AT5G11110
AT5G11140	AT5G40405	AT5G25280	AT5G46740		AT5G11140
AT5G11340	AT5G40450	AT5G25450	AT5G46790		AT5G11340
AT5G11680	AT5G40910	AT5G25520	AT5G46800		AT5G11680
AT5G11690	AT5G41140	AT5G25530	AT5G46890		AT5G11690
AT5G12020	AT5G41410	AT5G26146	AT5G47210		AT5G12020
AT5G12030	AT5G41670	AT5G26760	AT5G47230		AT5G12030
AT5G12040	AT5G41790	AT5G26860	AT5G47500		AT5G12040
AT5G12110	AT5G42100	AT5G27460	AT5G47560		AT5G12110
AT5G12120	AT5G42240	AT5G27660	AT5G47630		AT5G12120
AT5G12840	AT5G42270	AT5G28540	AT5G47910		AT5G12840
AT5G12880	AT5G42880	AT5G28770	AT5G47950		AT5G12880
AT5G12900	AT5G43880	AT5G34853	AT5G47960		AT5G12900
AT5G13080	AT5G44110	AT5G35080	AT5G47980		AT5G13080
AT5G13150	AT5G44390	AT5G35320	AT5G47990		AT5G13150
AT5G13170	AT5G44400	AT5G35460	AT5G48000		AT5G13170
AT5G13200	AT5G44480	AT5G37260	AT5G48010		AT5G13200
AT5G13205	AT5G44550	AT5G37340	AT5G48150		AT5G13205
AT5G13210	AT5G44750	AT5G37350	AT5G48500		AT5G13210
AT5G13240	AT5G45070	AT5G37500	AT5G48657		AT5G13240
AT5G13820	AT5G45260	AT5G37540	AT5G48830		AT5G13820
AT5G13870	AT5G45280	AT5G37670	AT5G48850		AT5G13870
AT5G13880	AT5G45300	AT5G37710	AT5G48870		AT5G13880
AT5G13920	AT5G45430	AT5G38895	AT5G48880		AT5G13920
AT5G14020	AT5G45470	AT5G39660	AT5G48900		AT5G14020
AT5G14810	AT5G45472	AT5G40600	AT5G48910		AT5G14810
AT5G15050	AT5G45510	AT5G40770	AT5G49160		AT5G15050
AT5G15090	AT5G45560	AT5G40790	AT5G49215		AT5G15090
AT5G15250	AT5G45600	AT5G40850	AT5G49270		AT5G15250
AT5G15260	AT5G45700	AT5G40930	AT5G49480		AT5G15260
AT5G15290	AT5G45750	AT5G41320	AT5G49760		AT5G15290
AT5G15330	AT5G45800	AT5G41560	AT5G50000		AT5G15330
AT5G15350	AT5G46110	AT5G41610	AT5G50390		AT5G15350
AT5G15420	AT5G46230	AT5G41612	AT5G50550		AT5G15420
AT5G15430	AT5G46260	AT5G41620	AT5G50630		AT5G15430
AT5G15440	AT5G46280	AT5G41710	AT5G50740		AT5G15440
AT5G15450	AT5G46510	AT5G42020	AT5G50800		AT5G15450
AT5G15500	AT5G46520	AT5G42146	AT5G51780		AT5G15500
AT5G15860	AT5G46800	AT5G42150	AT5G51795		AT5G15860
AT5G15870	AT5G47010	AT5G42220	AT5G52060		AT5G15870
AT5G15960	AT5G47210	AT5G42300	AT5G52250		AT5G15960
AT5G15970	AT5G47490	AT5G42380	AT5G52310		AT5G15970
AT5G16110	AT5G47500	AT5G42470	AT5G52320		AT5G16110
AT5G16200	AT5G47560	AT5G43300	AT5G53420		AT5G16200
AT5G16260	AT5G47910	AT5G43330	AT5G53450		AT5G16260
AT5G16380	AT5G47950	AT5G43420	AT5G53460		AT5G16380
AT5G16550	AT5G47980	AT5G43450	AT5G53880		AT5G16550
AT5G16600	AT5G47990	AT5G43620	AT5G53990		AT5G16600
AT5G17240	AT5G48000	AT5G43850	AT5G54100		AT5G17240
AT5G17310	AT5G48010	AT5G43950	AT5G54140		AT5G17310
AT5G17350	AT5G48150	AT5G44005	AT5G54270		AT5G17350
AT5G17400	AT5G48360	AT5G44310	AT5G54370		AT5G17400
AT5G17410	AT5G48485	AT5G44572	AT5G54470		AT5G17410
AT5G17460	AT5G48490	AT5G45110	AT5G54500		AT5G17460
AT5G17760	AT5G48520	AT5G45130	AT5G54770		AT5G17760
AT5G17850	AT5G48560	AT5G45630	AT5G54780		AT5G17850
AT5G18040	AT5G48830	AT5G45660	AT5G55570		AT5G18040
AT5G18065	AT5G48880	AT5G45690	AT5G55580		AT5G18065
AT5G18100	AT5G48900	AT5G46170	AT5G55790		AT5G18100
AT5G18130	AT5G48930	AT5G46210	AT5G55920		AT5G18130
AT5G18270	AT5G49030	AT5G46700	AT5G56080		AT5G18270
AT5G18340	AT5G49160	AT5G46710	AT5G56120		AT5G18340
AT5G18450	AT5G49215	AT5G47090	AT5G56250		AT5G18450
AT5G18700	AT5G49500	AT5G47120	AT5G56710		AT5G18700
AT5G18850	AT5G49730	AT5G47160	AT5G56950		AT5G18850
AT5G19110	AT5G49740	AT5G47390	AT5G57090		AT5G19110
AT5G19480	AT5G49760	AT5G47400	AT5G57120		AT5G19480
AT5G19860	AT5G49900	AT5G47420	AT5G57220		AT5G19860
AT5G19870	AT5G49960	AT5G47610	AT5G57290		AT5G19870
AT5G19875	AT5G50160	AT5G47830	AT5G57460		AT5G19875
AT5G20020	AT5G50180	AT5G48030	AT5G57480		AT5G20020
AT5G20060	AT5G50630	AT5G48570	AT5G57530		AT5G20060
AT5G20230	AT5G50740	AT5G49390	AT5G57540		AT5G20230
AT5G20830	AT5G50800	AT5G49450	AT5G57785		AT5G20830
AT5G20910	AT5G52060	AT5G49560	AT5G57870		AT5G20910
AT5G22050	AT5G52250	AT5G49700	AT5G58420		AT5G22050
AT5G22060	AT5G52320	AT5G49840	AT5G58500		AT5G22060
AT5G22390	AT5G52450	AT5G49910	AT5G58860		AT5G22390
AT5G22470	AT5G52882	AT5G49920	AT5G59240		AT5G22470
AT5G23340	AT5G53420	AT5G49990	AT5G59350		AT5G23340
AT5G23350	AT5G53450	AT5G50240	AT5G59850		AT5G23350
AT5G23380	AT5G53460	AT5G50780	AT5G59870		AT5G23380
AT5G23480	AT5G53880	AT5G51105	AT5G59970		AT5G23480
AT5G23590	AT5G54100	AT5G51370	AT5G60030		AT5G23590
AT5G24060	AT5G54270	AT5G51430	AT5G60050		AT5G24060
AT5G24080	AT5G54440	AT5G51440	AT5G60390		AT5G24080
AT5G24390	AT5G54500	AT5G51450	AT5G60450		AT5G24390
AT5G24470	AT5G54630	AT5G51451	AT5G60530		AT5G24470
AT5G24590	AT5G54770	AT5G51460	AT5G60570		AT5G24590
AT5G24660	AT5G54840	AT5G51465	AT5G60670		AT5G24660
AT5G24940	AT5G55390	AT5G51740	AT5G60710		AT5G24940
AT5G25110	AT5G55500	AT5G51760	AT5G60890		AT5G25110
AT5G25130	AT5G55570	AT5G51920	AT5G60920		AT5G25130
AT5G25240	AT5G55580	AT5G52020	AT5G61000		AT5G25240
AT5G25280	AT5G55790	AT5G52600	AT5G61010		AT5G25280
AT5G25340	AT5G55920	AT5G52630	AT5G61020		AT5G25340
AT5G25450	AT5G56040	AT5G52640	AT5G61420		AT5G25450
AT5G25530	AT5G56080	AT5G52650	AT5G61570		AT5G25530
AT5G26146	AT5G56120	AT5G52655	AT5G61770		AT5G26146
AT5G26760	AT5G56680	AT5G52900	AT5G61780		AT5G26760
AT5G27420	AT5G57220	AT5G52970	AT5G62070		AT5G27420
AT5G27460	AT5G57530	AT5G53080	AT5G62220		AT5G27460
AT5G27660	AT5G58140	AT5G53120	AT5G62390		AT5G27660
AT5G28540	AT5G58580	AT5G53160	AT5G62630		AT5G28540
AT5G28910	AT5G58860	AT5G53400	AT5G62680		AT5G28910
AT5G33355	AT5G59090	AT5G53680	AT5G63140		AT5G33355
AT5G34853	AT5G59240	AT5G53830	AT5G63180		AT5G34853
AT5G35320	AT5G59350	AT5G53870	AT5G63550		AT5G35320
AT5G35460	AT5G59600	AT5G54080	AT5G63980		AT5G35460
AT5G35520	AT5G59680	AT5G54165	AT5G64040		AT5G35520
AT5G36290	AT5G59730	AT5G54170	AT5G64100		AT5G36290
AT5G37260	AT5G59732	AT5G54300	AT5G64120		AT5G37260
AT5G37340	AT5G59870	AT5G54585	AT5G64140		AT5G37340
AT5G37350	AT5G59970	AT5G54730	AT5G64570		AT5G37350
AT5G37380	AT5G60390	AT5G54860	AT5G64572		AT5G37380
AT5G37440	AT5G60450	AT5G54940	AT5G64640		AT5G37440
AT5G37500	AT5G60710	AT5G54960	AT5G65010		AT5G37500
AT5G37540	AT5G60920	AT5G55830	AT5G65270		AT5G37540
AT5G37670	AT5G60930	AT5G55896	AT5G65280		AT5G37670
AT5G37710	AT5G61000	AT5G55970	AT5G65310		AT5G37710
AT5G38200	AT5G61010	AT5G56000	AT5G65360		AT5G38200
AT5G38895	AT5G61020	AT5G56010	AT5G65410		AT5G38895
AT5G39610	AT5G61420	AT5G56020	AT5G65610		AT5G39610
AT5G39785	AT5G61570	AT5G56030	AT5G65613		AT5G39785
AT5G40600	AT5G61780	AT5G56050	AT5G65700		AT5G40600
AT5G40770	AT5G62070	AT5G56500	AT5G65860		AT5G40770
AT5G40790	AT5G62410	AT5G56600	AT5G65930		AT5G40790
AT5G40800	AT5G62630	AT5G56630	AT5G66200		AT5G40800
AT5G40850	AT5G62680	AT5G56750	AT5G66230		AT5G40850
AT5G41560	AT5G63040	AT5G57050	AT5G66410		AT5G41560
AT5G41610	AT5G63140	AT5G57100	AT5G66570		AT5G41610
AT5G41612	AT5G63180	AT5G57140	AT5G66690		AT5G41612
AT5G41620	AT5G63550	AT5G57560	AT5G66760		AT5G41620
AT5G41710	AT5G64040	AT5G57610	AT5G66770		AT5G41710
AT5G41761	AT5G64120	AT5G57900	AT5G67070		AT5G41761
AT5G41990	AT5G64290	AT5G57910	AT5G67200		AT5G41990
AT5G42020	AT5G64570	AT5G58070	AT5G67280		AT5G42020
AT5G42146	AT5G64572	AT5G58110	AT5G67330		AT5G42146
AT5G42150	AT5G64770	AT5G58170	AT5G67360		AT5G42150
AT5G42220	AT5G65010	AT5G58590	AT5G67510		AT5G42220
AT5G42300	AT5G65310	AT5G58770			AT5G42300
AT5G42380	AT5G65360	AT5G58780			AT5G42380
AT5G42470	AT5G65410	AT5G58787			AT5G42470
AT5G43160	AT5G65460	AT5G59220			AT5G43160
AT5G43170	AT5G65610	AT5G59310			AT5G43170
AT5G43300	AT5G65613	AT5G59320			AT5G43300
AT5G43330	AT5G65700	AT5G59420			AT5G43330
AT5G43420	AT5G65930	AT5G59570			AT5G43420
AT5G43440	AT5G66230	AT5G59710			AT5G43440
AT5G43450	AT5G66570	AT5G59720			AT5G43450
AT5G43620	AT5G66690	AT5G59820			AT5G43620
AT5G43850	AT5G66770	AT5G59830			AT5G43850
AT5G43950	AT5G67070	AT5G59845			AT5G43950
AT5G44005	AT5G67200	AT5G60130			AT5G44005
AT5G44080	AT5G67280	AT5G60610			AT5G44080
AT5G44310	AT5G67330	AT5G61190			AT5G44310
AT5G44572	AT5G67360	AT5G61510			AT5G44572
AT5G45110	AT5G67510	AT5G61790			AT5G45110
AT5G45130		AT5G61800			AT5G45130
AT5G45340		AT5G62020			AT5G45340
AT5G45630		AT5G62030			AT5G45630
AT5G45690		AT5G62090			AT5G45690
AT5G45780		AT5G62200			AT5G45780
AT5G45820		AT5G62430			AT5G45820
AT5G46170		AT5G62470			AT5G46170
AT5G46410		AT5G62620			AT5G46410
AT5G46570		AT5G62730			AT5G46570
AT5G46700		AT5G62910			AT5G46700
AT5G46710		AT5G63130			AT5G46710
AT5G47060		AT5G63160			AT5G47060
AT5G47120		AT5G63350			AT5G47120
AT5G47160		AT5G63375			AT5G47160
AT5G47180		AT5G63470			AT5G47180
AT5G47330		AT5G63480			AT5G47330
AT5G47420		AT5G63500			AT5G47420
AT5G47530		AT5G63830			AT5G47530
AT5G47600		AT5G64180			AT5G47600
AT5G47610		AT5G64200			AT5G47610
AT5G47830		AT5G64230			AT5G47830
AT5G48030		AT5G64310			AT5G48030
AT5G48250		AT5G64400			AT5G48250
AT5G48570		AT5G64410			AT5G48570
AT5G49330		AT5G64430			AT5G49330
AT5G49390		AT5G64510			AT5G49390
AT5G49450		AT5G64950			AT5G49450
AT5G49560		AT5G65110			AT5G49560
AT5G49690		AT5G65140			AT5G49690
AT5G49700		AT5G65170			AT5G49700
AT5G49920		AT5G65300			AT5G49920
AT5G49990		AT5G65490			AT5G49990
AT5G50240		AT5G65683			AT5G50240
AT5G50360		AT5G65750			AT5G50360
AT5G50450		AT5G65900			AT5G50450
AT5G50780		AT5G66052			AT5G50780
AT5G51105		AT5G66053			AT5G51105
AT5G51430		AT5G66070			AT5G51430
AT5G51440		AT5G66090			AT5G51440
AT5G51450		AT5G66100			AT5G51450
AT5G51451		AT5G66110			AT5G51451
AT5G51460		AT5G66150			AT5G51460
AT5G51465		AT5G66620			AT5G51465
AT5G51740		AT5G66630			AT5G51740
AT5G51760		AT5G66880			AT5G51760
AT5G52020		AT5G67190			AT5G52020
AT5G52300		AT5G67290			AT5G52300
AT5G52570		AT5G67420			AT5G52570
AT5G52600		AT5G67480			AT5G52600
AT5G52630		MIR2936			AT5G52630
AT5G52640		MIR5642a			AT5G52640
AT5G52650					AT5G52650
AT5G52655					AT5G52655
AT5G53000					AT5G53000
AT5G53120					AT5G53120
AT5G53160					AT5G53160
AT5G53400					AT5G53400
AT5G53680					AT5G53680
AT5G53710					AT5G53710
AT5G54080					AT5G54080
AT5G54165					AT5G54165
AT5G54170					AT5G54170
AT5G54300					AT5G54300
AT5G54580					AT5G54580
AT5G54585					AT5G54585
AT5G54860					AT5G54860
AT5G54940					AT5G54940
AT5G54960					AT5G54960
AT5G55050					AT5G55050
AT5G55830					AT5G55830
AT5G55896					AT5G55896
AT5G55930					AT5G55930
AT5G55970					AT5G55970
AT5G56000					AT5G56000
AT5G56020					AT5G56020
AT5G56030					AT5G56030
AT5G56050					AT5G56050
AT5G56500					AT5G56500
AT5G56600					AT5G56600
AT5G56630					AT5G56630
AT5G56750					AT5G56750
AT5G57050					AT5G57050
AT5G57100					AT5G57100
AT5G57123					AT5G57123
AT5G57150					AT5G57150
AT5G57380					AT5G57380
AT5G57560					AT5G57560
AT5G57900					AT5G57900
AT5G57910					AT5G57910
AT5G58050					AT5G58050
AT5G58060					AT5G58060
AT5G58070					AT5G58070
AT5G58110					AT5G58110
AT5G58170					AT5G58170
AT5G58590					AT5G58590
AT5G58770					AT5G58770
AT5G58780					AT5G58780
AT5G58787					AT5G58787
AT5G58960					AT5G58960
AT5G59220					AT5G59220
AT5G59300					AT5G59300
AT5G59310					AT5G59310
AT5G59320					AT5G59320
AT5G59420					AT5G59420
AT5G59450					AT5G59450
AT5G59570					AT5G59570
AT5G59720					AT5G59720
AT5G59820					AT5G59820
AT5G59845					AT5G59845
AT5G60130					AT5G60130
AT5G60610					AT5G60610
AT5G60800					AT5G60800
AT5G61190					AT5G61190
AT5G61510					AT5G61510
AT5G61530					AT5G61530
AT5G61790					AT5G61790
AT5G61810					AT5G61810
AT5G61830					AT5G61830
AT5G61840					AT5G61840
AT5G62020					AT5G62020
AT5G62030					AT5G62030
AT5G62040					AT5G62040
AT5G62090					AT5G62090
AT5G62200					AT5G62200
AT5G62430					AT5G62430
AT5G62470					AT5G62470
AT5G62480					AT5G62480
AT5G62490					AT5G62490
AT5G62620					AT5G62620
AT5G62730					AT5G62730
AT5G62910					AT5G62910
AT5G63130					AT5G63130
AT5G63350					AT5G63350
AT5G63370					AT5G63370
AT5G63375					AT5G63375
AT5G63500					AT5G63500
AT5G63830					AT5G63830
AT5G64180					AT5G64180
AT5G64200					AT5G64200
AT5G64230					AT5G64230
AT5G64310					AT5G64310
AT5G64330					AT5G64330
AT5G64400					AT5G64400
AT5G64401					AT5G64401
AT5G64430					AT5G64430
AT5G64510					AT5G64510
AT5G64880					AT5G64880
AT5G64930					AT5G64930
AT5G64950					AT5G64950
AT5G65140					AT5G65140
AT5G65207					AT5G65207
AT5G65300					AT5G65300
AT5G65480					AT5G65480
AT5G65490					AT5G65490
AT5G65900					AT5G65900
AT5G65920					AT5G65920
AT5G66052					AT5G66052
AT5G66053					AT5G66053
AT5G66070					AT5G66070
AT5G66090					AT5G66090
AT5G66100					AT5G66100
AT5G66110					AT5G66110
AT5G66170					AT5G66170
AT5G66400					AT5G66400
AT5G66620					AT5G66620
AT5G66880					AT5G66880
AT5G67290					AT5G67290
AT5G67300					AT5G67300
AT5G67480					AT5G67480
AT5G67540					AT5G67540
MIR2936					MIR2936
MIR5642a					MIR5642a
MIR5642b					MIR5642b
					AT1G01060
					AT1G01180
					AT1G01300
					AT1G01320
					AT1G01390
					AT1G01420
					AT1G01580
					AT1G01790
					AT1G02010
					AT1G02360
					AT1G02500
					AT1G02730
					AT1G02820
					AT1G03110
					AT1G03410
					AT1G03420
					AT1G03510
					AT1G03540
					AT1G03740
					AT1G03820
					AT1G03870
					AT1G03930
					AT1G04020
					AT1G04110
					AT1G04183
					AT1G04430
					AT1G04433
					AT1G04503
					AT1G04520
					AT1G04680
					AT1G04790
					AT1G04800
					AT1G05213
					AT1G05253
					AT1G05320
					AT1G05470
					AT1G05835
					AT1G05950
					AT1G06000
					AT1G06002
					AT1G06150
					AT1G06360
					AT1G06410
					AT1G06670
					AT1G06680
					AT1G06690
					AT1G06760
					AT1G07070
					AT1G07090
					AT1G07110
					AT1G07390
					AT1G07477
					AT1G07650
					AT1G07893
					AT1G07940
					AT1G08043
					AT1G08130
					AT1G08160
					AT1G08280
					AT1G08380
					AT1G08797
					AT1G09200
					AT1G09390
					AT1G09560
					AT1G09750
					AT1G09765
					AT1G09780
					AT1G09820
					AT1G09840
					AT1G10580
					AT1G10640
					AT1G10850
					AT1G10900
					AT1G10920
					AT1G11120
					AT1G11150
					AT1G11440
					AT1G11450
					AT1G11580
					AT1G11670
					AT1G11700
					AT1G11720
					AT1G11850
					AT1G11860
					AT1G12000
					AT1G12020
					AT1G12090
					AT1G12110
					AT1G12240
					AT1G12500
					AT1G12550
					AT1G12750
					AT1G12850
					AT1G12860
					AT1G12900
					AT1G13110
					AT1G13170
					AT1G13210
					AT1G13250
					AT1G13420
					AT1G13440
					AT1G13510
					AT1G13560
					AT1G13609
					AT1G13650
					AT1G14150
					AT1G14185
					AT1G14430
					AT1G14460
					AT1G14580
					AT1G14840
					AT1G14900
					AT1G14920
					AT1G15000
					AT1G15002
					AT1G15210
					AT1G15260
					AT1G15290
					AT1G15310
					AT1G15690
					AT1G15820
					AT1G15950
					AT1G16300
					AT1G16400
					AT1G16410
					AT1G16480
					AT1G16550
					AT1G16710
					AT1G16720
					AT1G17100
					AT1G17170
					AT1G17180
					AT1G17220
					AT1G17450
					AT1G18210
					AT1G18250
					AT1G18370
					AT1G18560
					AT1G18590
					AT1G18670
					AT1G18710
					AT1G18880
					AT1G18975
					AT1G18980
					AT1G19430
					AT1G19670
					AT1G20190
					AT1G20330
					AT1G20340
					AT1G20693
					AT1G20840
					AT1G20950
					AT1G21100
					AT1G21110
					AT1G21160
					AT1G21170
					AT1G21590
					AT1G21880
					AT1G22060
					AT1G22065
					AT1G22360
					AT1G22410
					AT1G22530
					AT1G22550
					AT1G22590
					AT1G22610
					AT1G23200
					AT1G23290
					AT1G23300
					AT1G24147
					AT1G24310
					AT1G24625
					AT1G25500
					AT1G25530
					AT1G25570
					AT1G26110
					AT1G26410
					AT1G26560
					AT1G26770
					AT1G27060
					AT1G27930
					AT1G27940
					AT1G28130
					AT1G28280
					AT1G28400
					AT1G28440
					AT1G28600
					AT1G28680
					AT1G28685
					AT1G28710
					AT1G29720
					AT1G29910
					AT1G29920
					AT1G29930
					AT1G29950
					AT1G29965
					AT1G30380
					AT1G30510
					AT1G30530
					AT1G30700
					AT1G30760
					AT1G30840
					AT1G30900
					AT1G31070
					AT1G31330
					AT1G31420
					AT1G31580
					AT1G31770
					AT1G32060
					AT1G32440
					AT1G32450
					AT1G32900
					AT1G33811
					AT1G34320
					AT1G34340
					AT1G35250
					AT1G35260
					AT1G35330
					AT1G35560
					AT1G35620
					AT1G36180
					AT1G37130
					AT1G38131
					AT1G41830
					AT1G42970
					AT1G43650
[truncated: 2,472 more rows]

## Sheet: Panther all DEGs
Supplementary Data 1. Lists of differentially expressed genes and the associated over- and under-represented Biological Processes. Raw Panther results for all DEGs.
Analysis Type:	PANTHER Overrepresentation Test (Released 20190517)
Annotation Version and Release Date:	GO Ontology database Released 2019-02-02
Analyzed List:	upload_1 (Arabidopsis thaliana)
Reference List:	Arabidopsis thaliana (all genes in database)
Test Type:	FISHER
Correction:	FDR
GO biological process complete	Arabidopsis thaliana - REFLIST (27581)	upload_1 (4143)	upload_1 (expected)	upload_1 (over/under)	upload_1 (fold Enrichment)	upload_1 (raw P-value)	upload_1 (FDR)
photosynthesis, light harvesting in photosystem I (GO:0009768)	24	18	3.61	+	4.99	1.81E-06	1.55E-04
protein-chromophore linkage (GO:0018298)	28	21	4.21	+	4.99	2.53E-07	2.58E-05
response to high light intensity (GO:0009644)	81	51	12.17	+	4.19	1.35E-13	4.99E-11
cellular response to unfolded protein (GO:0034620)	35	21	5.26	+	3.99	3.48E-06	2.67E-04
response to unfolded protein (GO:0006986)	35	21	5.26	+	3.99	3.48E-06	2.64E-04
cellular response to heat (GO:0034605)	67	37	10.06	+	3.68	4.25E-09	6.61E-07
S-glycoside biosynthetic process (GO:0016144)	42	23	6.31	+	3.65	3.86E-06	2.89E-04
glucosinolate biosynthetic process (GO:0019761)	42	23	6.31	+	3.65	3.86E-06	2.86E-04
glycosinolate biosynthetic process (GO:0019758)	42	23	6.31	+	3.65	3.86E-06	2.82E-04
heat acclimation (GO:0010286)	48	25	7.21	+	3.47	2.95E-06	2.39E-04
cellular response to topologically incorrect protein (GO:0035967)	54	28	8.11	+	3.45	8.23E-07	7.85E-05
response to hydrogen peroxide (GO:0042542)	78	40	11.72	+	3.41	5.12E-09	7.57E-07
nucleotide-sugar metabolic process (GO:0009225)	56	28	8.41	+	3.33	1.43E-06	1.26E-04
response to heat (GO:0009408)	220	109	33.05	+	3.30	3.70E-21	2.43E-18
response to topologically incorrect protein (GO:0035966)	58	28	8.71	+	3.21	2.43E-06	1.99E-04
protein refolding (GO:0042026)	48	23	7.21	+	3.19	2.05E-05	1.29E-03
glycosyl compound biosynthetic process (GO:1901659)	63	29	9.46	+	3.06	3.37E-06	2.69E-04
'de novo' protein folding (GO:0006458)	57	26	8.56	+	3.04	1.20E-05	7.99E-04
response to zinc ion (GO:0010043)	42	19	6.31	+	3.01	1.88E-04	9.35E-03
response to far red light (GO:0010218)	51	23	7.66	+	3.00	4.31E-05	2.52E-03
chaperone cofactor-dependent protein refolding (GO:0051085)	47	21	7.06	+	2.97	1.01E-04	5.40E-03
'de novo' posttranslational protein folding (GO:0051084)	47	21	7.06	+	2.97	1.01E-04	5.35E-03
nucleotide-sugar biosynthetic process (GO:0009226)	36	16	5.41	+	2.96	6.87E-04	2.84E-02
indole glucosinolate metabolic process (GO:0042343)	36	16	5.41	+	2.96	6.87E-04	2.82E-02
response to light intensity (GO:0009642)	156	68	23.43	+	2.90	1.01E-11	2.29E-09
photosynthesis, light harvesting (GO:0009765)	46	20	6.91	+	2.89	2.92E-04	1.36E-02
response to red light (GO:0010114)	69	30	10.36	+	2.89	6.59E-06	4.53E-04
chaperone-mediated protein folding (GO:0061077)	61	26	9.16	+	2.84	3.54E-05	2.11E-03
S-glycoside metabolic process (GO:0016143)	137	52	20.58	+	2.53	1.05E-07	1.22E-05
glucosinolate metabolic process (GO:0019760)	137	52	20.58	+	2.53	1.05E-07	1.20E-05
glycosinolate metabolic process (GO:0019757)	137	52	20.58	+	2.53	1.05E-07	1.18E-05
response to reactive oxygen species (GO:0000302)	176	66	26.44	+	2.50	3.80E-09	6.07E-07
response to endoplasmic reticulum stress (GO:0034976)	73	27	10.97	+	2.46	2.54E-04	1.23E-02
response to toxic substance (GO:0009636)	207	76	31.09	+	2.44	4.43E-10	7.48E-08
toxin metabolic process (GO:0009404)	71	26	10.67	+	2.44	3.73E-04	1.65E-02
response to temperature stimulus (GO:0009266)	622	224	93.43	+	2.40	3.92E-26	4.63E-23
sulfur compound biosynthetic process (GO:0044272)	142	50	21.33	+	2.34	1.37E-06	1.23E-04
secondary metabolite biosynthetic process (GO:0044550)	180	63	27.04	+	2.33	8.03E-08	9.69E-06
response to blue light (GO:0009637)	93	32	13.97	+	2.29	1.47E-04	7.59E-03
response to water deprivation (GO:0009414)	346	116	51.97	+	2.23	2.39E-12	6.41E-10
response to water (GO:0009415)	353	118	53.02	+	2.23	1.47E-12	4.14E-10
drug transmembrane transport (GO:0006855)	93	31	13.97	+	2.22	2.69E-04	1.27E-02
protein folding (GO:0006457)	264	88	39.66	+	2.22	1.27E-09	2.09E-07
glycosyl compound metabolic process (GO:1901657)	205	68	30.79	+	2.21	1.05E-07	1.24E-05
response to karrikin (GO:0080167)	129	42	19.38	+	2.17	5.06E-05	2.93E-03
secondary metabolic process (GO:0019748)	371	120	55.73	+	2.15	6.96E-12	1.65E-09
indole-containing compound metabolic process (GO:0042430)	91	29	13.67	+	2.12	9.28E-04	3.71E-02
response to oxidative stress (GO:0006979)	425	133	63.84	+	2.08	2.61E-12	6.44E-10
photosynthesis (GO:0015979)	189	59	28.39	+	2.08	4.07E-06	2.90E-04
phenylpropanoid metabolic process (GO:0009698)	141	44	21.18	+	2.08	6.51E-05	3.70E-03
response to chitin (GO:0010200)	137	42	20.58	+	2.04	1.29E-04	6.71E-03
response to inorganic substance (GO:0010035)	945	289	141.95	+	2.04	4.03E-24	3.97E-21
response to cadmium ion (GO:0046686)	345	104	51.82	+	2.01	4.68E-09	7.10E-07
response to antibiotic (GO:0046677)	304	91	45.66	+	1.99	4.51E-08	5.56E-06
response to cold (GO:0009409)	428	128	64.29	+	1.99	8.76E-11	1.79E-08
response to osmotic stress (GO:0006970)	666	199	100.04	+	1.99	4.54E-16	2.44E-13
response to drug (GO:0042493)	593	175	89.08	+	1.96	8.68E-14	3.42E-11
response to abscisic acid (GO:0009737)	554	163	83.22	+	1.96	6.35E-13	1.98E-10
response to alcohol (GO:0097305)	558	163	83.82	+	1.94	1.09E-12	3.22E-10
response to salt stress (GO:0009651)	590	172	88.63	+	1.94	3.75E-13	1.30E-10
response to metal ion (GO:0010038)	478	137	71.80	+	1.91	2.18E-10	3.80E-08
sulfur compound metabolic process (GO:0006790)	378	108	56.78	+	1.90	1.99E-08	2.62E-06
cellular response to abscisic acid stimulus (GO:0071215)	199	56	29.89	+	1.87	7.74E-05	4.36E-03
cellular response to alcohol (GO:0097306)	199	56	29.89	+	1.87	7.74E-05	4.32E-03
response to organonitrogen compound (GO:0010243)	232	65	34.85	+	1.87	2.72E-05	1.66E-03
abscisic acid-activated signaling pathway (GO:0009738)	169	47	25.39	+	1.85	3.56E-04	1.58E-02
response to abiotic stimulus (GO:0009628)	2099	579	315.30	+	1.84	1.08E-37	3.19E-34
response to red or far red light (GO:0009639)	215	59	32.30	+	1.83	9.44E-05	5.08E-03
response to nitrogen compound (GO:1901698)	307	84	46.12	+	1.82	3.42E-06	2.70E-04
response to light stimulus (GO:0009416)	739	202	111.01	+	1.82	4.71E-13	1.55E-10
response to radiation (GO:0009314)	760	203	114.16	+	1.78	2.54E-12	6.54E-10
response to fungus (GO:0009620)	310	82	46.57	+	1.76	1.47E-05	9.43E-04
response to oxygen-containing compound (GO:1901700)	1595	421	239.59	+	1.76	6.28E-24	5.30E-21
plant-type cell wall organization or biogenesis (GO:0071669)	229	60	34.40	+	1.74	2.89E-04	1.36E-02
response to wounding (GO:0009611)	216	56	32.45	+	1.73	5.39E-04	2.28E-02
defense response to fungus (GO:0050832)	232	60	34.85	+	1.72	3.20E-04	1.47E-02
response to lipid (GO:0033993)	751	194	112.81	+	1.72	1.01E-10	1.92E-08
cell wall biogenesis (GO:0042546)	195	50	29.29	+	1.71	1.15E-03	4.57E-02
response to acid chemical (GO:0001101)	1178	301	176.95	+	1.70	1.26E-15	6.23E-13
response to ethylene (GO:0009723)	216	55	32.45	+	1.70	7.64E-04	3.12E-02
cell wall organization (GO:0071555)	260	66	39.06	+	1.69	2.57E-04	1.23E-02
carbohydrate biosynthetic process (GO:0016051)	316	80	47.47	+	1.69	6.31E-05	3.62E-03
response to chemical (GO:0042221)	2776	698	416.99	+	1.67	6.14E-35	1.21E-31
anion transport (GO:0006820)	291	73	43.71	+	1.67	1.61E-04	8.08E-03
external encapsulating structure organization (GO:0045229)	296	73	44.46	+	1.64	2.46E-04	1.20E-02
response to organic substance (GO:0010033)	1915	471	287.66	+	1.64	1.55E-21	1.14E-18
cellular response to organic substance (GO:0071310)	765	188	114.91	+	1.64	5.17E-09	7.45E-07
response to biotic stimulus (GO:0009607)	989	240	148.56	+	1.62	9.93E-11	1.96E-08
response to external biotic stimulus (GO:0043207)	988	239	148.41	+	1.61	1.29E-10	2.38E-08
response to other organism (GO:0051707)	988	239	148.41	+	1.61	1.29E-10	2.30E-08
cell wall organization or biogenesis (GO:0071554)	430	104	64.59	+	1.61	3.08E-05	1.86E-03
response to hormone (GO:0009725)	1599	377	240.19	+	1.57	6.58E-15	2.99E-12
regulation of signal transduction (GO:0009966)	293	69	44.01	+	1.57	1.23E-03	4.82E-02
response to endogenous stimulus (GO:0009719)	1615	379	242.59	+	1.56	1.11E-14	4.69E-12
carbohydrate derivative metabolic process (GO:1901135)	671	157	100.79	+	1.56	1.37E-06	1.24E-04
response to stress (GO:0006950)	3157	735	474.22	+	1.55	3.91E-28	5.78E-25
cellular response to chemical stimulus (GO:0070887)	963	223	144.65	+	1.54	1.28E-08	1.72E-06
oxoacid metabolic process (GO:0043436)	1009	233	151.56	+	1.54	7.45E-09	1.05E-06
cellular response to acid chemical (GO:0071229)	399	92	59.93	+	1.54	3.30E-04	1.50E-02
organic acid metabolic process (GO:0006082)	1011	233	151.86	+	1.53	7.81E-09	1.07E-06
response to external stimulus (GO:0009605)	1387	319	208.34	+	1.53	1.47E-11	3.23E-09
drug metabolic process (GO:0017144)	409	94	61.44	+	1.53	3.03E-04	1.40E-02
response to bacterium (GO:0009617)	493	113	74.05	+	1.53	9.16E-05	4.97E-03
organic acid biosynthetic process (GO:0016053)	464	106	69.70	+	1.52	1.59E-04	8.09E-03
carboxylic acid biosynthetic process (GO:0046394)	464	106	69.70	+	1.52	1.59E-04	8.02E-03
generation of precursor metabolites and energy (GO:0006091)	352	80	52.87	+	1.51	1.17E-03	4.62E-02
defense response to other organism (GO:0098542)	682	154	102.44	+	1.50	9.08E-06	6.10E-04
cellular response to hormone stimulus (GO:0032870)	656	148	98.54	+	1.50	1.30E-05	8.44E-04
cellular response to stress (GO:0033554)	925	208	138.95	+	1.50	2.79E-07	2.80E-05
cellular response to endogenous stimulus (GO:0071495)	672	150	100.94	+	1.49	2.02E-05	1.28E-03
monocarboxylic acid metabolic process (GO:0032787)	429	95	64.44	+	1.47	8.33E-04	3.35E-02
ion transport (GO:0006811)	658	145	98.84	+	1.47	4.26E-05	2.52E-03
response to stimulus (GO:0050896)	5729	1259	860.57	+	1.46	2.43E-41	1.44E-37
oxidation-reduction process (GO:0055114)	942	207	141.50	+	1.46	1.10E-06	1.01E-04
cellular response to oxygen-containing compound (GO:1901701)	575	124	86.37	+	1.44	3.41E-04	1.54E-02
small molecule biosynthetic process (GO:0044283)	629	135	94.48	+	1.43	2.60E-04	1.24E-02
carboxylic acid metabolic process (GO:0019752)	864	184	129.78	+	1.42	2.59E-05	1.59E-03
regulation of response to stimulus (GO:0048583)	679	142	101.99	+	1.39	4.27E-04	1.83E-02
small molecule metabolic process (GO:0044281)	1504	314	225.92	+	1.39	1.28E-07	1.40E-05
cellular response to stimulus (GO:0051716)	2332	483	350.29	+	1.38	7.05E-11	1.49E-08
transmembrane transport (GO:0055085)	687	142	103.20	+	1.38	6.70E-04	2.79E-02
multi-organism process (GO:0051704)	1482	299	222.61	+	1.34	3.46E-06	2.69E-04
signal transduction (GO:0007165)	1363	274	204.74	+	1.34	1.20E-05	7.91E-04
cell communication (GO:0007154)	1622	326	243.64	+	1.34	1.60E-06	1.39E-04
regulation of biological quality (GO:0065008)	1131	225	169.89	+	1.32	1.25E-04	6.57E-03
signaling (GO:0023052)	1392	276	209.10	+	1.32	2.41E-05	1.50E-03
defense response (GO:0006952)	1145	226	171.99	+	1.31	1.89E-04	9.30E-03
establishment of localization (GO:0051234)	2215	426	332.72	+	1.28	1.84E-06	1.56E-04
organonitrogen compound biosynthetic process (GO:1901566)	1320	253	198.28	+	1.28	4.07E-04	1.76E-02
biosynthetic process (GO:0009058)	2782	532	417.89	+	1.27	1.41E-07	1.52E-05
organic substance biosynthetic process (GO:1901576)	2664	509	400.17	+	1.27	3.12E-07	3.08E-05
transport (GO:0006810)	2171	414	326.11	+	1.27	5.57E-06	3.92E-04
localization (GO:0051179)	2359	447	354.35	+	1.26	4.00E-06	2.89E-04
cellular biosynthetic process (GO:0044249)	2518	470	378.23	+	1.24	8.46E-06	5.75E-04
system development (GO:0048731)	1830	338	274.89	+	1.23	4.06E-04	1.77E-02
cellular process (GO:0009987)	10275	1845	1543.43	+	1.20	5.09E-19	3.01E-16
multicellular organism development (GO:0007275)	2613	467	392.50	+	1.19	3.49E-04	1.56E-02
developmental process (GO:0032502)	3147	562	472.72	+	1.19	8.02E-05	4.39E-03
biological regulation (GO:0065007)	5678	1013	852.90	+	1.19	2.15E-08	2.77E-06
regulation of biological process (GO:0050789)	4997	884	750.61	+	1.18	1.00E-06	9.41E-05
regulation of cellular process (GO:0050794)	4393	777	659.88	+	1.18	6.35E-06	4.42E-04
anatomical structure development (GO:0048856)	2965	523	445.38	+	1.17	3.95E-04	1.73E-02
multicellular organismal process (GO:0032501)	2853	503	428.56	+	1.17	5.77E-04	2.42E-02
organonitrogen compound metabolic process (GO:1901564)	4219	734	633.74	+	1.16	7.84E-05	4.34E-03
cellular metabolic process (GO:0044237)	7144	1229	1073.12	+	1.15	4.02E-07	3.90E-05
metabolic process (GO:0008152)	8180	1406	1228.73	+	1.14	3.09E-08	3.88E-06
organic substance metabolic process (GO:0071704)	7341	1250	1102.71	+	1.13	2.08E-06	1.73E-04
Unclassified (UNCLASSIFIED)	6353	806	954.30	-	.84	1.95E-07	2.06E-05
sexual reproduction (GO:0019953)	216	14	32.45	-	.43	7.91E-04	3.21E-02
multi-organism reproductive process (GO:0044703)	223	14	33.50	-	.42	4.57E-04	1.94E-02

## Sheet: GO + FDR all DEGs
GO term	FDR
GO:0009768	0.000155
GO:0018298	2.58e-05
GO:0009644	4.99e-11
GO:0034620	0.000267
GO:0006986	0.000264
GO:0034605	6.61e-07
GO:0016144	0.000289
GO:0019761	0.000286
GO:0019758	0.000282
GO:0010286	0.000239
GO:0035967	7.85e-05
GO:0042542	7.57e-07
GO:0009225	0.000126
GO:0009408	2.43e-18
GO:0035966	0.000199
GO:0042026	0.00129
GO:1901659	0.000269
GO:0006458	0.000799
GO:0010043	0.00935
GO:0010218	0.00252
GO:0051085	0.0054
GO:0051084	0.00535
GO:0009226	0.0284
GO:0042343	0.0282
GO:0009642	2.29e-09
GO:0009765	0.0136
GO:0010114	0.000453
GO:0061077	0.00211
GO:0016143	1.22e-05
GO:0019760	1.2e-05
GO:0019757	1.18e-05
GO:0000302	6.07e-07
GO:0034976	0.0123
GO:0009636	7.48e-08
GO:0009404	0.0165
GO:0009266	4.63e-23
GO:0044272	0.000123
GO:0044550	9.69e-06
GO:0009637	0.00759
GO:0009414	6.41e-10
GO:0009415	4.14e-10
GO:0006855	0.0127
GO:0006457	2.09e-07
GO:1901657	1.24e-05
GO:0080167	0.00293
GO:0019748	1.65e-09
GO:0042430	0.0371
GO:0006979	6.44e-10
GO:0015979	0.00029
GO:0009698	0.0037
GO:0010200	0.00671
GO:0010035	3.97e-21
GO:0046686	7.1e-07
GO:0046677	5.56e-06
GO:0009409	1.79e-08
GO:0006970	2.44e-13
GO:0042493	3.42e-11
GO:0009737	1.98e-10
GO:0097305	3.22e-10
GO:0009651	1.3e-10
GO:0010038	3.8e-08
GO:0006790	2.62e-06
GO:0071215	0.00436
GO:0097306	0.00432
GO:0010243	0.00166
GO:0009738	0.0158
GO:0009628	3.19e-34
GO:0009639	0.00508
GO:1901698	0.00027
GO:0009416	1.55e-10
GO:0009314	6.54e-10
GO:0009620	0.000943
GO:1901700	5.3e-21
GO:0071669	0.0136
GO:0009611	0.0228
GO:0050832	0.0147
GO:0033993	1.92e-08
GO:0042546	0.0457
GO:0001101	6.23e-13
GO:0009723	0.0312
GO:0071555	0.0123
GO:0016051	0.00362
GO:0042221	1.21e-31
GO:0006820	0.00808
GO:0045229	0.012
GO:0010033	1.14e-18
GO:0071310	7.45e-07
GO:0009607	1.96e-08
GO:0043207	2.38e-08
GO:0051707	2.3e-08
GO:0071554	0.00186
GO:0009725	2.99e-12
GO:0009966	0.0482
GO:0009719	4.69e-12
GO:1901135	0.000124
GO:0006950	5.78e-25
GO:0070887	1.72e-06
GO:0043436	1.05e-06
GO:0071229	0.015
GO:0006082	1.07e-06
GO:0009605	3.23e-09
GO:0017144	0.014
GO:0009617	0.00497
GO:0016053	0.00809
GO:0046394	0.00802
GO:0006091	0.0462
GO:0098542	0.00061
GO:0032870	0.000844
GO:0033554	2.8e-05
GO:0071495	0.00128
GO:0032787	0.0335
GO:0006811	0.00252
GO:0050896	1.44e-37
GO:0055114	0.000101
GO:1901701	0.0154
GO:0044283	0.0124
GO:0019752	0.00159
GO:0048583	0.0183
GO:0044281	1.4e-05
GO:0051716	1.49e-08
GO:0055085	0.0279
GO:0051704	0.000269
GO:0007165	0.000791
GO:0007154	0.000139
GO:0065008	0.00657
GO:0023052	0.0015
GO:0006952	0.0093
GO:0051234	0.000156
GO:1901566	0.0176
GO:0009058	1.52e-05
GO:1901576	3.08e-05
GO:0006810	0.000392
GO:0051179	0.000289
GO:0044249	0.000575
GO:0048731	0.0177
GO:0009987	3.01e-16
GO:0007275	0.0156
GO:0032502	0.00439
GO:0065007	2.77e-06
GO:0050789	9.41e-05
GO:0050794	0.000442
GO:0048856	0.0173
GO:0032501	0.0242
GO:1901564	0.00434
GO:0044237	3.9e-05
GO:0008152	3.88e-06
GO:0071704	0.000173
UNCLASSIFIED	2.06e-05
GO:0019953	0.0321
GO:0044703	0.0194

## Sheet: REVIGO all DEGs
Supplementary Data 1. Lists of differentially expressed genes and the associated over- and under-represented Biological Processes. Raw REVIGO results for over- and under-represented biological processes in all DEGs. GO terms with a dispensability < 0.05 are highlighted in yellow.
term_ID	description	frequency	uniqueness	dispensability	representative	eliminated
GO:0006457	protein folding	0.903%	0.963	0.000	6457	0
GO:0006820	anion transport	1.956%	0.959	0.000	6820	0
GO:0008152	metabolic process	75.387%	0.997	0.000	8152	0
GO:0009628	response to abiotic stimulus	0.571%	0.706	0.000	9628	0
GO:0009987	cellular process	63.780%	0.995	0.000	9987	0
GO:0019748	secondary metabolic process	0.138%	0.939	0.000	19748	0
GO:0023052	signaling	6.765%	0.988	0.000	23052	0
GO:0032501	multicellular organismal process	2.373%	0.987	0.000	32501	0
GO:0032502	developmental process	2.812%	0.987	0.000	32502	0
GO:0044703	multi-organism reproductive process	0.335%	0.975	0.000	44703	0
GO:0048856	anatomical structure development	2.540%	0.964	0.000	48856	0
GO:0050896	response to stimulus	12.210%	0.988	0.000	50896	0
GO:0051179	localization	18.495%	0.989	0.000	51179	0
GO:0051704	multi-organism process	0.751%	0.987	0.000	51704	0
GO:0065007	biological regulation	20.498%	0.989	0.000	65007	0
GO:0065008	regulation of biological quality	3.395%	0.957	0.000	65008	0
GO:0009058	biosynthetic process	31.611%	0.975	0.018	9058	0
GO:0006458	'de novo' protein folding	0.027%	0.941	0.025	6458	0
GO:0071555	cell wall organization	0.709%	0.937	0.034	71555	0
GO:1901135	carbohydrate derivative metabolic process	6.319%	0.963	0.036	1901135	0
GO:0006790	sulfur compound metabolic process	1.822%	0.948	0.037	6790	0
GO:0071554	cell wall organization or biogenesis	0.950%	0.963	0.038	71554	0
GO:0009768	photosynthesis, light harvesting in photosystem I	0.003%	0.954	0.041	9768	0
GO:0017144	drug metabolic process	0.058%	0.959	0.052	17144	0
GO:0018298	protein-chromophore linkage	0.095%	0.955	0.054	18298	0
GO:0015979	photosynthesis	0.183%	0.956	0.058	15979	0
GO:0042430	indole-containing compound metabolic process	0.285%	0.934	0.060	42430	0
GO:0006091	generation of precursor metabolites and energy	1.940%	0.948	0.075	6091	0
GO:0044237	cellular metabolic process	53.061%	0.942	0.078	44237	0
GO:0007154	cell communication	7.219%	0.957	0.100	7154	0
GO:0044550	secondary metabolite biosynthetic process	0.101%	0.854	0.116	44550	0
GO:0071704	organic substance metabolic process	58.357%	0.976	0.119	71704	0
GO:1901564	organonitrogen compound metabolic process	17.886%	0.950	0.153	1901564	0
GO:1901657	glycosyl compound metabolic process	2.961%	0.876	0.155	1901657	0
GO:1901576	organic substance biosynthetic process	30.365%	0.918	0.195	1901576	0
GO:0044281	small molecule metabolic process	15.138%	0.906	0.290	44281	0
GO:0009266	response to temperature stimulus	0.213%	0.641	0.326	9266	0
GO:0051707	response to other organism	0.299%	0.685	0.336	51707	0
GO:0010035	response to inorganic substance	0.317%	0.628	0.338	10035	0
GO:0009607	response to biotic stimulus	0.342%	0.717	0.341	9607	0
GO:0016051	carbohydrate biosynthetic process	1.079%	0.889	0.346	16051	0
GO:0009719	response to endogenous stimulus	0.526%	0.708	0.355	9719	0
GO:0016143	S-glycoside metabolic process	0.003%	0.892	0.374	16143	0
GO:0055114	oxidation-reduction process	15.060%	0.906	0.415	55114	0
GO:0042221	response to chemical	3.071%	0.663	0.427	42221	0
GO:0006979	response to oxidative stress	0.575%	0.668	0.427	6979	0
GO:0009966	regulation of signal transduction	0.857%	0.643	0.448	9966	0
GO:0048583	regulation of response to stimulus	1.120%	0.677	0.463	48583	0
GO:0009605	response to external stimulus	1.370%	0.685	0.475	9605	0
GO:0051234	establishment of localization	17.756%	0.951	0.486	51234	0
GO:0034976	response to endoplasmic reticulum stress	0.100%	0.687	0.488	34976	0
GO:0009611	response to wounding	0.127%	0.701	0.498	9611	0
GO:0045229	external encapsulating structure organization	0.795%	0.952	0.498	45229	0
GO:1901566	organonitrogen compound biosynthetic process	14.064%	0.907	0.500	1901566	0
GO:0050789	regulation of biological process	19.373%	0.951	0.502	50789	0
GO:0046394	carboxylic acid biosynthetic process	4.159%	0.822	0.513	46394	0
GO:0009226	nucleotide-sugar biosynthetic process	0.142%	0.892	0.513	9226	0
GO:0044272	sulfur compound biosynthetic process	1.235%	0.885	0.534	44272	0
GO:0051085	chaperone mediated protein folding requiring cofactor	0.010%	0.938	0.536	51085	0
GO:0001101	response to acid chemical	0.124%	0.651	0.542	1101	0
GO:0046677	response to antibiotic	0.128%	0.650	0.544	46677	0
GO:0009225	nucleotide-sugar metabolic process	0.250%	0.906	0.544	9225	0
GO:0010038	response to metal ion	0.132%	0.633	0.545	10038	0
GO:1901698	response to nitrogen compound	0.178%	0.643	0.559	1901698	0
GO:0006855	drug transmembrane transport	0.189%	0.605	0.561	6855	0
GO:0006950	response to stress	4.575%	0.651	0.562	6950	0
GO:0006952	defense response	0.568%	0.668	0.570	6952	0
GO:0006082	organic acid metabolic process	9.086%	0.852	0.574	6082	0
GO:0042493	response to drug	0.266%	0.633	0.578	42493	0
GO:0006811	ion transport	5.344%	0.955	0.591	6811	0
GO:0042026	protein refolding	0.069%	0.938	0.603	42026	0
GO:1901700	response to oxygen-containing compound	0.503%	0.616	0.611	1901700	0
GO:0009725	response to hormone	0.335%	0.585	0.614	9725	0
GO:0061077	chaperone-mediated protein folding	0.043%	0.939	0.621	61077	0
GO:0010114	response to red light	0.003%	0.706	0.622	10114	0
GO:0010286	heat acclimation	0.005%	0.687	0.640	10286	0
GO:0009644	response to high light intensity	0.005%	0.701	0.640	9644	0
GO:0032787	monocarboxylic acid metabolic process	2.485%	0.858	0.644	32787	0
GO:0080167	response to karrikin	0.006%	0.708	0.646	80167	0
GO:0044283	small molecule biosynthetic process	5.677%	0.852	0.654	44283	0
GO:0044249	cellular biosynthetic process	30.048%	0.892	0.658	44249	0
GO:0055085	transmembrane transport	8.916%	0.953	0.664	55085	0
GO:0010200	response to chitin	0.004%	0.663	0.664	10200	0
GO:1901659	glycosyl compound biosynthetic process	1.466%	0.844	0.668	1901659	0
GO:0010033	response to organic substance	0.900%	0.599	0.675	10033	0
GO:0033554	cellular response to stress	2.967%	0.600	0.679	33554	0
GO:0009642	response to light intensity	0.011%	0.689	0.679	9642	0
GO:0051716	cellular response to stimulus	9.561%	0.608	0.680	51716	0
GO:0035967	cellular response to topologically incorrect protein	0.044%	0.598	0.695	35967	0
GO:0009723	response to ethylene	0.010%	0.661	0.702	9725	1
GO:0035966	response to topologically incorrect protein	0.053%	0.620	0.705	9725	1
GO:0097305	response to alcohol	0.055%	0.623	0.707	9725	1
GO:0009636	response to toxic substance	0.833%	0.602	0.711	10033	1
GO:0009639	response to red or far red light	0.012%	0.687	0.712	9642	1
GO:0071669	plant-type cell wall organization or biogenesis	0.037%	0.951	0.718	71555	1
GO:0010043	response to zinc ion	0.009%	0.685	0.719	10038	1
GO:0070887	cellular response to chemical stimulus	1.007%	0.579	0.725	10033	1
GO:0007165	signal transduction	6.621%	0.572	0.729	51716	1
GO:0009651	response to salt stress	0.043%	0.653	0.739	9266	1
GO:0009737	response to abscisic acid	0.029%	0.611	0.754	9725	1
GO:0050794	regulation of cellular process	18.840%	0.918	0.761	50789	1
GO:0000302	response to reactive oxygen species	0.181%	0.592	0.762	9725	1
GO:0009765	photosynthesis, light harvesting	0.019%	0.951	0.764	9768	1
GO:0019760	glucosinolate metabolic process	0.003%	0.812	0.764	44550	1
GO:0046686	response to cadmium ion	0.027%	0.666	0.772	10038	1
GO:0006970	response to osmotic stress	0.082%	0.639	0.775	9266	1
GO:0042542	response to hydrogen peroxide	0.029%	0.624	0.776	10038	1
GO:0043436	oxoacid metabolic process	9.006%	0.836	0.781	46394	1
GO:0033993	response to lipid	0.226%	0.607	0.792	9725	1
GO:0006810	transport	17.616%	0.950	0.794	51234	1
GO:0009414	response to water deprivation	0.022%	0.562	0.807	9725	1
GO:0009416	response to light stimulus	0.157%	0.639	0.815	9266	1
GO:0009637	response to blue light	0.015%	0.684	0.816	9266	1
GO:0009415	response to water	0.026%	0.569	0.816	9725	1
GO:0009408	response to heat	0.166%	0.619	0.818	9266	1
GO:0009314	response to radiation	0.193%	0.643	0.828	9266	1
GO:0050832	defense response to fungus	0.028%	0.700	0.828	51707	1
GO:0019953	sexual reproduction	0.275%	0.975	0.841	44703	1
GO:0009620	response to fungus	0.035%	0.725	0.842	51707	1
GO:0016053	organic acid biosynthetic process	4.171%	0.823	0.851	46394	1
GO:0010243	response to organonitrogen compound	0.140%	0.606	0.851	9725	1
GO:0009698	phenylpropanoid metabolic process	0.021%	0.869	0.856	44550	1
GO:0009409	response to cold	0.039%	0.650	0.862	9266	1
GO:0048731	system development	1.264%	0.933	0.863	48856	1
GO:0034605	cellular response to heat	0.041%	0.632	0.865	9266	1
GO:0071229	cellular response to acid chemical	0.066%	0.618	0.865	9725	1
GO:0071310	cellular response to organic substance	0.651%	0.558	0.870	9725	1
GO:0071215	cellular response to abscisic acid stimulus	0.011%	0.616	0.871	9725	1
GO:0010218	response to far red light	0.003%	0.704	0.871	10114	1
GO:1901701	cellular response to oxygen-containing compound	0.345%	0.573	0.879	9725	1
GO:0009404	toxin metabolic process	0.039%	0.870	0.891	44550	1
GO:0032870	cellular response to hormone stimulus	0.242%	0.571	0.891	9725	1
GO:0051084	'de novo' posttranslational protein folding	0.011%	0.938	0.897	51085	1
GO:0019752	carboxylic acid metabolic process	8.831%	0.837	0.902	46394	1
GO:0097306	cellular response to alcohol	0.021%	0.620	0.902	9725	1
GO:0007275	multicellular organism development	1.559%	0.932	0.921	48856	1
GO:0042546	cell wall biogenesis	0.640%	0.938	0.923	71555	1
GO:0009738	abscisic acid-activated signaling pathway	0.010%	0.599	0.929	9725	1
GO:0071495	cellular response to endogenous stimulus	0.402%	0.668	0.931	9725	1
GO:0009617	response to bacterium	0.145%	0.700	0.938	51707	1
GO:0042343	indole glucosinolate metabolic process	0.001%	0.823	0.942	44550	1
GO:0019761	glucosinolate biosynthetic process	0.001%	0.816	0.944	44550	1
GO:0016144	S-glycoside biosynthetic process	0.001%	0.849	0.944	44550	1
GO:0034620	cellular response to unfolded protein	0.029%	0.608	0.950	35967	1
GO:0006986	response to unfolded protein	0.037%	0.620	0.965	35967	1
GO:0098542	defense response to other organism	0.220%	0.658	0.971	51707	1
GO:0043207	response to external biotic stimulus	0.300%	0.686	0.974	51707	1
GO:0019758	glycosinolate biosynthetic process	0.001%	0.816	1.000	44550	1
GO:0019757	glycosinolate metabolic process	0.003%	0.812	1.000	44550	1

## Sheet: Selected all DEGs
Supplementary Data 1. Lists of differentially expressed genes and the associated over- and under-represented Biological Processes. List of selected representative enriched biological processes in all DEGs (yellow).
GO_biological_process	Gene_number	Fold_enrichment	FDR
carbohydrate_derivative_metabolic_process_(GO:1901135)	157	1.56	1.24E-04
cell_wall_organization_(GO:0071555)	66	1.69	1.23E-02
cell_wall_organization_or_biogenesis_(GO:0071554)	104	1.61	1.86E-03
regulation_of_biological_quality_(GO:0065008)	225	1.32	6.57E-03
biological_regulation_(GO:0065007)	1013	1.19	2.77E-06
multi-organism_process_(GO:0051704)	299	1.34	2.69E-04
localization_(GO:0051179)	447	1.26	2.89E-04
response_to_stimulus_(GO:0050896)	1259	1.46	1.44E-37
anatomical_structure_development_(GO:0048856)	523	1.17	1.73E-02
multi-organism_reproductive_process_(GO:0044703)	14	.42	1.94E-02
developmental_process_(GO:0032502)	562	1.19	4.39E-03
multicellular_organismal_process_(GO:0032501)	503	1.17	2.42E-02
signaling_(GO:0023052)	276	1.32	1.50E-03
secondary_metabolic_process_(GO:0019748)	120	2.15	1.65E-09
cellular_process_(GO:0009987)	1845	1.20	3.01E-16
photosynthesis,_light_harvesting_in_photosystem_I_(GO:0009768)	18	4.99	1.55E-04
response_to_abiotic_stimulus_(GO:0009628)	579	1.84	3.19E-34
biosynthetic_process_(GO:0009058)	532	1.27	1.52E-05
metabolic_process_(GO:0008152)	1406	1.14	3.88E-06
anion_transport_(GO:0006820)	73	1.67	8.08E-03
sulfur_compound_metabolic_process_(GO:0006790)	108	1.90	2.62E-06
de_novo'_protein_folding_(GO:0006458)	26	3.04	7.99E-04
protein_folding_(GO:0006457)	88	2.22	2.09E-07

## Sheet: Panther WT up
Supplementary Data 1. Lists of differentially expressed genes and the associated over- and under-represented Biological Processes. Raw Panther results for up-regulated genes in WT.
Analysis Type:	PANTHER Overrepresentation Test (Released 20190517)
Annotation Version and Release Date:	GO Ontology database Released 2019-02-02
Analyzed List:	upload_1 (Arabidopsis thaliana)
Reference List:	Arabidopsis thaliana (all genes in database)
Test Type:	FISHER
Correction:	FDR
GO biological process complete	Arabidopsis thaliana - REFLIST (27581)	upload_1 (1583)	upload_1 (expected)	upload_1 (over/under)	upload_1 (fold Enrichment)	upload_1 (raw P-value)	upload_1 (FDR)
anaerobic respiration (GO:0009061)	9	5	.52	+	9.68	6.20E-04	3.71E-02
cellular response to unfolded protein (GO:0034620)	35	19	2.01	+	9.46	2.42E-11	4.77E-09
response to unfolded protein (GO:0006986)	35	19	2.01	+	9.46	2.42E-11	4.62E-09
cellular response to heat (GO:0034605)	67	30	3.85	+	7.80	2.42E-15	8.94E-13
endoplasmic reticulum unfolded protein response (GO:0030968)	18	8	1.03	+	7.74	4.80E-05	4.58E-03
heat acclimation (GO:0010286)	48	21	2.75	+	7.62	5.14E-11	9.22E-09
cellular response to topologically incorrect protein (GO:0035967)	54	23	3.10	+	7.42	9.64E-12	2.04E-09
positive regulation of transcription from RNA polymerase II promoter in response to stress (GO:0036003)	24	10	1.38	+	7.26	8.53E-06	9.52E-04
positive regulation of transcription from RNA polymerase II promoter in response to heat stress (GO:0061408)	24	10	1.38	+	7.26	8.53E-06	9.34E-04
regulation of DNA-templated transcription in response to stress (GO:0043620)	29	12	1.66	+	7.21	1.14E-06	1.46E-04
response to hydrogen peroxide (GO:0042542)	78	32	4.48	+	7.15	2.05E-15	8.08E-13
response to heat (GO:0009408)	220	90	12.63	+	7.13	7.36E-41	4.35E-37
'de novo' protein folding (GO:0006458)	57	23	3.27	+	7.03	2.31E-11	4.72E-09
response to topologically incorrect protein (GO:0035966)	58	23	3.33	+	6.91	3.06E-11	5.66E-09
regulation of transcription from RNA polymerase II promoter in response to stress (GO:0043618)	28	11	1.61	+	6.84	4.76E-06	5.75E-04
chaperone cofactor-dependent protein refolding (GO:0051085)	47	18	2.70	+	6.67	6.58E-09	1.08E-06
'de novo' posttranslational protein folding (GO:0051084)	47	18	2.70	+	6.67	6.58E-09	1.05E-06
chaperone-mediated protein folding (GO:0061077)	61	23	3.50	+	6.57	6.93E-11	1.21E-08
protein refolding (GO:0042026)	48	18	2.75	+	6.53	8.59E-09	1.34E-06
response to high light intensity (GO:0009644)	81	30	4.65	+	6.45	1.33E-13	3.58E-11
protein import into mitochondrial matrix (GO:0030150)	23	7	1.32	+	5.30	9.25E-04	4.80E-02
protein complex oligomerization (GO:0051259)	49	14	2.81	+	4.98	5.54E-06	6.42E-04
response to endoplasmic reticulum stress (GO:0034976)	73	19	4.19	+	4.53	4.18E-07	5.62E-05
protein folding (GO:0006457)	264	68	15.15	+	4.49	1.37E-21	1.16E-18
response to light intensity (GO:0009642)	156	38	8.95	+	4.24	4.69E-12	1.03E-09
response to toxic substance (GO:0009636)	207	50	11.88	+	4.21	2.73E-15	8.99E-13
response to reactive oxygen species (GO:0000302)	176	41	10.10	+	4.06	2.32E-12	5.29E-10
response to temperature stimulus (GO:0009266)	622	135	35.70	+	3.78	4.19E-35	1.24E-31
response to chitin (GO:0010200)	137	28	7.86	+	3.56	7.64E-08	1.05E-05
process utilizing autophagic mechanism (GO:0061919)	64	13	3.67	+	3.54	2.40E-04	1.73E-02
autophagy (GO:0006914)	64	13	3.67	+	3.54	2.40E-04	1.71E-02
response to water deprivation (GO:0009414)	346	66	19.86	+	3.32	2.68E-15	9.32E-13
response to water (GO:0009415)	353	66	20.26	+	3.26	6.19E-15	1.93E-12
response to antibiotic (GO:0046677)	304	56	17.45	+	3.21	1.19E-12	2.81E-10
response to organonitrogen compound (GO:0010243)	232	42	13.32	+	3.15	1.21E-09	2.04E-07
response to oxidative stress (GO:0006979)	425	75	24.39	+	3.07	1.30E-15	5.49E-13
leaf senescence (GO:0010150)	97	17	5.57	+	3.05	1.41E-04	1.14E-02
regulation of abscisic acid-activated signaling pathway (GO:0009787)	106	18	6.08	+	2.96	1.29E-04	1.09E-02
regulation of cellular response to alcohol (GO:1905957)	106	18	6.08	+	2.96	1.29E-04	1.08E-02
regulation of response to alcohol (GO:1901419)	106	18	6.08	+	2.96	1.29E-04	1.06E-02
plant organ senescence (GO:0090693)	103	17	5.91	+	2.88	2.65E-04	1.80E-02
response to abscisic acid (GO:0009737)	554	89	31.80	+	2.80	6.14E-16	3.03E-13
response to alcohol (GO:0097305)	558	89	32.03	+	2.78	7.84E-16	3.57E-13
response to osmotic stress (GO:0006970)	666	104	38.22	+	2.72	7.90E-18	5.19E-15
response to nitrogen compound (GO:1901698)	307	47	17.62	+	2.67	1.72E-08	2.54E-06
response to drug (GO:0042493)	593	88	34.03	+	2.59	5.55E-14	1.56E-11
response to inorganic substance (GO:0010035)	945	137	54.24	+	2.53	1.41E-20	1.04E-17
response to salt stress (GO:0009651)	590	85	33.86	+	2.51	4.72E-13	1.21E-10
mitochondrion organization (GO:0007005)	166	23	9.53	+	2.41	2.78E-04	1.85E-02
response to lipid (GO:0033993)	751	99	43.10	+	2.30	8.67E-13	2.14E-10
response to cold (GO:0009409)	428	54	24.56	+	2.20	4.62E-07	6.07E-05
response to oxygen-containing compound (GO:1901700)	1595	201	91.54	+	2.20	3.29E-23	4.86E-20
response to abiotic stimulus (GO:0009628)	2099	253	120.47	+	2.10	1.24E-26	2.45E-23
response to ethylene (GO:0009723)	216	26	12.40	+	2.10	8.80E-04	4.65E-02
response to acid chemical (GO:0001101)	1178	140	67.61	+	2.07	2.05E-14	6.07E-12
positive regulation of response to stimulus (GO:0048584)	249	29	14.29	+	2.03	7.51E-04	4.11E-02
response to organic substance (GO:0010033)	1915	206	109.91	+	1.87	1.49E-16	8.78E-14
cellular response to stress (GO:0033554)	925	98	53.09	+	1.85	4.71E-08	6.63E-06
response to chemical (GO:0042221)	2776	292	159.33	+	1.83	2.59E-22	3.07E-19
positive regulation of gene expression (GO:0010628)	541	55	31.05	+	1.77	1.56E-04	1.25E-02
response to stress (GO:0006950)	3157	320	181.19	+	1.77	2.76E-22	2.72E-19
positive regulation of transcription, DNA-templated (GO:0045893)	483	48	27.72	+	1.73	6.40E-04	3.79E-02
positive regulation of RNA biosynthetic process (GO:1902680)	485	48	27.84	+	1.72	6.60E-04	3.83E-02
positive regulation of nucleic acid-templated transcription (GO:1903508)	485	48	27.84	+	1.72	6.60E-04	3.79E-02
positive regulation of RNA metabolic process (GO:0051254)	506	50	29.04	+	1.72	5.99E-04	3.61E-02
cellular response to organic substance (GO:0071310)	765	75	43.91	+	1.71	2.61E-05	2.71E-03
positive regulation of macromolecule biosynthetic process (GO:0010557)	521	51	29.90	+	1.71	5.19E-04	3.20E-02
response to light stimulus (GO:0009416)	739	72	42.41	+	1.70	4.00E-05	3.95E-03
positive regulation of nucleobase-containing compound metabolic process (GO:0045935)	524	51	30.07	+	1.70	7.41E-04	4.09E-02
response to radiation (GO:0009314)	760	72	43.62	+	1.65	9.55E-05	8.69E-03
positive regulation of nitrogen compound metabolic process (GO:0051173)	698	66	40.06	+	1.65	2.46E-04	1.71E-02
response to hormone (GO:0009725)	1599	151	91.77	+	1.65	1.25E-08	1.90E-06
protein localization (GO:0008104)	778	73	44.65	+	1.63	1.14E-04	1.00E-02
positive regulation of macromolecule metabolic process (GO:0010604)	726	68	41.67	+	1.63	2.35E-04	1.74E-02
establishment of protein localization (GO:0045184)	705	66	40.46	+	1.63	2.67E-04	1.79E-02
response to endogenous stimulus (GO:0009719)	1615	151	92.69	+	1.63	2.66E-08	3.84E-06
protein transport (GO:0015031)	697	65	40.00	+	1.62	3.36E-04	2.18E-02
positive regulation of metabolic process (GO:0009893)	805	75	46.20	+	1.62	1.09E-04	9.79E-03
positive regulation of cellular metabolic process (GO:0031325)	752	70	43.16	+	1.62	2.21E-04	1.65E-02
cellular protein localization (GO:0034613)	646	60	37.08	+	1.62	7.09E-04	4.03E-02
cellular response to chemical stimulus (GO:0070887)	963	89	55.27	+	1.61	3.88E-05	3.89E-03
cellular macromolecule localization (GO:0070727)	678	62	38.91	+	1.59	7.13E-04	4.02E-02
positive regulation of biological process (GO:0048518)	1271	116	72.95	+	1.59	3.51E-06	4.32E-04
positive regulation of cellular process (GO:0048522)	1010	92	57.97	+	1.59	4.34E-05	4.21E-03
macromolecule localization (GO:0033036)	1033	93	59.29	+	1.57	5.36E-05	5.03E-03
peptide transport (GO:0015833)	765	68	43.91	+	1.55	8.11E-04	4.36E-02
nitrogen compound transport (GO:0071705)	962	85	55.21	+	1.54	2.18E-04	1.65E-02
amide transport (GO:0042886)	782	69	44.88	+	1.54	9.15E-04	4.79E-02
organic substance transport (GO:0071702)	1197	103	68.70	+	1.50	1.25E-04	1.07E-02
response to stimulus (GO:0050896)	5729	471	328.81	+	1.43	3.51E-16	1.89E-13
cellular response to stimulus (GO:0051716)	2332	187	133.84	+	1.40	9.51E-06	1.02E-03
regulation of cellular metabolic process (GO:0031323)	2865	219	164.44	+	1.33	3.05E-05	3.11E-03
regulation of RNA metabolic process (GO:0051252)	2186	167	125.46	+	1.33	3.06E-04	2.01E-02
regulation of nucleobase-containing compound metabolic process (GO:0019219)	2242	169	128.68	+	1.31	5.09E-04	3.17E-02
regulation of nitrogen compound metabolic process (GO:0051171)	2644	198	151.75	+	1.30	2.45E-04	1.73E-02
regulation of primary metabolic process (GO:0080090)	2714	199	155.77	+	1.28	6.49E-04	3.80E-02
regulation of metabolic process (GO:0019222)	3115	228	178.78	+	1.28	2.56E-04	1.76E-02
regulation of biological process (GO:0050789)	4997	363	286.80	+	1.27	2.89E-06	3.64E-04
regulation of cellular process (GO:0050794)	4393	319	252.13	+	1.27	1.53E-05	1.62E-03
biological regulation (GO:0065007)	5678	402	325.89	+	1.23	8.20E-06	9.33E-04
Unclassified (UNCLASSIFIED)	6353	301	364.63	-	.83	1.71E-04	1.33E-02
organic substance biosynthetic process (GO:1901576)	2664	112	152.90	-	.73	4.94E-04	3.14E-02
biosynthetic process (GO:0009058)	2782	116	159.67	-	.73	2.37E-04	1.73E-02
cellular biosynthetic process (GO:0044249)	2518	100	144.52	-	.69	8.14E-05	7.53E-03
macromolecule biosynthetic process (GO:0009059)	1262	45	72.43	-	.62	7.24E-04	4.04E-02
cellular nitrogen compound biosynthetic process (GO:0044271)	1211	41	69.50	-	.59	3.39E-04	2.18E-02
amide biosynthetic process (GO:0043604)	615	16	35.30	-	.45	5.00E-04	3.15E-02
ribosome biogenesis (GO:0042254)	381	6	21.87	-	.27	1.62E-04	1.27E-02
ncRNA processing (GO:0034470)	323	4	18.54	-	.22	1.19E-04	1.04E-02
ncRNA metabolic process (GO:0034660)	391	4	22.44	-	.18	5.51E-06	6.52E-04
sexual reproduction (GO:0019953)	216	2	12.40	-	.16	8.11E-04	4.40E-02
rRNA metabolic process (GO:0016072)	220	2	12.63	-	.16	8.42E-04	4.49E-02
multi-organism reproductive process (GO:0044703)	223	2	12.80	-	.16	5.69E-04	3.47E-02

## Sheet: Panther WT down
Supplementary Data 1. Lists of differentially expressed genes and the associated over- and under-represented Biological Processes. Raw Panther results for down-regulated genes in WT.
Analysis Type:	PANTHER Overrepresentation Test (Released 20190517)
Annotation Version and Release Date:	GO Ontology database Released 2019-02-02
Analyzed List:	upload_1 (Arabidopsis thaliana)
Reference List:	Arabidopsis thaliana (all genes in database)
Test Type:	FISHER
Correction:	FDR
GO biological process complete	Arabidopsis thaliana - REFLIST (27581)	upload_1 (1536)	upload_1 (expected)	upload_1 (over/under)	upload_1 (fold Enrichment)	upload_1 (raw P-value)	upload_1 (FDR)
UDP-rhamnose metabolic process (GO:0033478)	4	4	.22	+	17.96	4.55E-04	1.35E-02
UDP-rhamnose biosynthetic process (GO:0010253)	4	4	.22	+	17.96	4.55E-04	1.35E-02
photosynthesis, light harvesting in photosystem I (GO:0009768)	24	18	1.34	+	13.47	9.56E-13	2.26E-10
protein-chromophore linkage (GO:0018298)	28	18	1.56	+	11.54	6.22E-12	1.15E-09
photosynthesis, light harvesting in photosystem II (GO:0009769)	10	6	.56	+	10.77	1.08E-04	3.95E-03
S-adenosylmethionine metabolic process (GO:0046500)	10	5	.56	+	8.98	7.81E-04	2.07E-02
S-glycoside biosynthetic process (GO:0016144)	42	21	2.34	+	8.98	4.20E-12	8.88E-10
glucosinolate biosynthetic process (GO:0019761)	42	21	2.34	+	8.98	4.20E-12	8.57E-10
glycosinolate biosynthetic process (GO:0019758)	42	21	2.34	+	8.98	4.20E-12	8.29E-10
syncytium formation (GO:0006949)	16	8	.89	+	8.98	2.03E-05	9.98E-04
response to low light intensity stimulus (GO:0009645)	19	9	1.06	+	8.51	8.56E-06	4.56E-04
defense response by callose deposition in cell wall (GO:0052544)	16	7	.89	+	7.86	1.30E-04	4.64E-03
photosynthesis, light harvesting (GO:0009765)	46	19	2.56	+	7.42	5.69E-10	7.48E-08
defense response by cell wall thickening (GO:0052482)	17	7	.95	+	7.39	1.75E-04	6.03E-03
primary shoot apical meristem specification (GO:0010072)	15	6	.84	+	7.18	5.83E-04	1.63E-02
carbon fixation (GO:0015977)	20	8	1.11	+	7.18	7.09E-05	2.81E-03
glycosyl compound biosynthetic process (GO:1901659)	63	25	3.51	+	7.13	2.27E-12	5.17E-10
reductive pentose-phosphate cycle (GO:0019253)	13	5	.72	+	6.91	1.95E-03	4.31E-02
phloem transport (GO:0010233)	21	8	1.17	+	6.84	9.33E-05	3.54E-03
vascular transport (GO:0010232)	21	8	1.17	+	6.84	9.33E-05	3.52E-03
defense response by callose deposition (GO:0052542)	19	7	1.06	+	6.62	3.04E-04	9.72E-03
glycine metabolic process (GO:0006544)	17	6	.95	+	6.34	9.91E-04	2.46E-02
response to far red light (GO:0010218)	51	18	2.84	+	6.34	1.19E-08	1.41E-06
sulfur compound transport (GO:0072348)	23	8	1.28	+	6.25	1.56E-04	5.40E-03
establishment of plastid localization (GO:0051667)	29	10	1.62	+	6.19	2.52E-05	1.21E-03
chloroplast relocation (GO:0009902)	29	10	1.62	+	6.19	2.52E-05	1.20E-03
plant-type cell wall modification involved in multidimensional cell growth (GO:0009831)	29	10	1.62	+	6.19	2.52E-05	1.19E-03
toxin biosynthetic process (GO:0009403)	21	7	1.17	+	5.99	4.99E-04	1.42E-02
nucleotide-sugar biosynthetic process (GO:0009226)	36	12	2.00	+	5.99	5.27E-06	3.06E-04
plastid localization (GO:0051644)	30	10	1.67	+	5.99	3.21E-05	1.45E-03
neurotransmitter metabolic process (GO:0042133)	30	10	1.67	+	5.99	3.21E-05	1.44E-03
chloroplast localization (GO:0019750)	30	10	1.67	+	5.99	3.21E-05	1.43E-03
cell wall modification involved in multidimensional cell growth (GO:0042547)	31	10	1.73	+	5.79	4.04E-05	1.72E-03
response to insect (GO:0009625)	31	10	1.73	+	5.79	4.04E-05	1.71E-03
nucleotide-sugar metabolic process (GO:0009225)	56	18	3.12	+	5.77	3.91E-08	4.13E-06
chloroplast accumulation movement (GO:0009904)	22	7	1.23	+	5.71	6.28E-04	1.73E-02
response to zinc ion (GO:0010043)	42	13	2.34	+	5.56	4.23E-06	2.61E-04
plant-type primary cell wall biogenesis (GO:0009833)	26	8	1.45	+	5.53	3.12E-04	9.82E-03
cellular response to nitric oxide (GO:0071732)	20	6	1.11	+	5.39	1.97E-03	4.32E-02
callose deposition in cell wall (GO:0052543)	27	8	1.50	+	5.32	3.86E-04	1.18E-02
sulfur compound biosynthetic process (GO:0044272)	142	42	7.91	+	5.31	4.96E-16	2.26E-13
chloroplast avoidance movement (GO:0009903)	24	7	1.34	+	5.24	9.64E-04	2.42E-02
response to red light (GO:0010114)	69	20	3.84	+	5.20	2.97E-08	3.19E-06
plant-type cell wall loosening (GO:0009828)	38	11	2.12	+	5.20	3.87E-05	1.68E-03
mitotic cytokinesis (GO:0000281)	42	12	2.34	+	5.13	1.93E-05	9.61E-04
regulation of neurotransmitter levels (GO:0001505)	35	10	1.95	+	5.13	9.49E-05	3.55E-03
S-glycoside metabolic process (GO:0016143)	137	39	7.63	+	5.11	1.55E-14	4.37E-12
glucosinolate metabolic process (GO:0019760)	137	39	7.63	+	5.11	1.55E-14	4.17E-12
glycosinolate metabolic process (GO:0019757)	137	39	7.63	+	5.11	1.55E-14	3.99E-12
cell wall pectin metabolic process (GO:0052546)	25	7	1.39	+	5.03	1.18E-03	2.81E-02
cell wall thickening (GO:0052386)	29	8	1.62	+	4.95	5.76E-04	1.62E-02
cytoskeleton-dependent cytokinesis (GO:0061640)	57	15	3.17	+	4.73	4.28E-06	2.61E-04
nucleosome assembly (GO:0006334)	27	7	1.50	+	4.66	1.72E-03	3.85E-02
induced systemic resistance (GO:0009682)	31	8	1.73	+	4.63	8.36E-04	2.18E-02
secondary metabolite biosynthetic process (GO:0044550)	180	46	10.02	+	4.59	2.13E-15	7.41E-13
cellulose biosynthetic process (GO:0030244)	47	12	2.62	+	4.58	4.95E-05	2.05E-03
indole glucosinolate metabolic process (GO:0042343)	36	9	2.00	+	4.49	4.89E-04	1.40E-02
glucose metabolic process (GO:0006006)	45	11	2.51	+	4.39	1.41E-04	4.96E-03
photosynthesis, light reaction (GO:0019684)	127	31	7.07	+	4.38	2.03E-10	3.24E-08
photosynthesis (GO:0015979)	189	46	10.53	+	4.37	9.89E-15	3.08E-12
chromatin assembly (GO:0031497)	33	8	1.84	+	4.35	1.18E-03	2.81E-02
cellular iron ion homeostasis (GO:0006879)	42	10	2.34	+	4.28	3.36E-04	1.05E-02
beta-glucan biosynthetic process (GO:0051274)	59	14	3.29	+	4.26	2.41E-05	1.17E-03
S-glycoside catabolic process (GO:0016145)	38	9	2.12	+	4.25	6.83E-04	1.84E-02
glucosinolate catabolic process (GO:0019762)	38	9	2.12	+	4.25	6.83E-04	1.83E-02
glycosinolate catabolic process (GO:0019759)	38	9	2.12	+	4.25	6.83E-04	1.82E-02
callose localization (GO:0052545)	34	8	1.89	+	4.23	1.39E-03	3.26E-02
establishment of organelle localization (GO:0051656)	64	15	3.56	+	4.21	1.41E-05	7.20E-04
glycosyl compound metabolic process (GO:1901657)	205	48	11.42	+	4.20	9.20E-15	3.02E-12
translational elongation (GO:0006414)	47	11	2.62	+	4.20	1.95E-04	6.46E-03
monosaccharide biosynthetic process (GO:0046364)	43	10	2.39	+	4.18	3.95E-04	1.21E-02
photosynthetic electron transport chain (GO:0009767)	39	9	2.17	+	4.14	8.02E-04	2.11E-02
mucilage metabolic process (GO:0010191)	35	8	1.95	+	4.10	1.64E-03	3.75E-02
amine biosynthetic process (GO:0009309)	44	10	2.45	+	4.08	4.62E-04	1.36E-02
cellular biogenic amine biosynthetic process (GO:0042401)	44	10	2.45	+	4.08	4.62E-04	1.35E-02
cellulose metabolic process (GO:0030243)	53	12	2.95	+	4.07	1.33E-04	4.70E-03
ammonium ion metabolic process (GO:0097164)	40	9	2.23	+	4.04	9.37E-04	2.37E-02
water-soluble vitamin metabolic process (GO:0006767)	63	14	3.51	+	3.99	4.49E-05	1.87E-03
plant-type cell wall modification (GO:0009827)	59	13	3.29	+	3.96	8.97E-05	3.49E-03
water-soluble vitamin biosynthetic process (GO:0042364)	50	11	2.78	+	3.95	3.11E-04	9.82E-03
lignin metabolic process (GO:0009808)	73	16	4.07	+	3.94	1.52E-05	7.70E-04
cellular biogenic amine metabolic process (GO:0006576)	60	13	3.34	+	3.89	1.04E-04	3.86E-03
cellular amine metabolic process (GO:0044106)	60	13	3.34	+	3.89	1.04E-04	3.84E-03
polysaccharide localization (GO:0033037)	37	8	2.06	+	3.88	2.21E-03	4.73E-02
secondary metabolic process (GO:0019748)	371	80	20.66	+	3.87	8.62E-22	1.27E-18
multidimensional cell growth (GO:0009825)	65	14	3.62	+	3.87	6.02E-05	2.47E-03
beta-glucan metabolic process (GO:0051273)	65	14	3.62	+	3.87	6.02E-05	2.46E-03
drug transmembrane transport (GO:0006855)	93	20	5.18	+	3.86	1.77E-06	1.20E-04
glycosyl compound catabolic process (GO:1901658)	61	13	3.40	+	3.83	1.20E-04	4.33E-03
cytokinesis (GO:0000910)	99	21	5.51	+	3.81	1.19E-06	8.70E-05
toxin metabolic process (GO:0009404)	71	15	3.95	+	3.79	4.03E-05	1.74E-03
iron ion homeostasis (GO:0055072)	57	12	3.17	+	3.78	2.39E-04	7.78E-03
DNA packaging (GO:0006323)	48	10	2.67	+	3.74	8.33E-04	2.18E-02
sulfur compound catabolic process (GO:0044273)	53	11	2.95	+	3.73	4.78E-04	1.39E-02
oligopeptide transport (GO:0006857)	68	14	3.79	+	3.70	9.18E-05	3.50E-03
phenylpropanoid metabolic process (GO:0009698)	141	29	7.85	+	3.69	2.16E-08	2.36E-06
chromatin assembly or disassembly (GO:0006333)	44	9	2.45	+	3.67	1.67E-03	3.76E-02
response to blue light (GO:0009637)	93	19	5.18	+	3.67	6.08E-06	3.42E-04
flavonoid metabolic process (GO:0009812)	69	14	3.84	+	3.64	1.05E-04	3.86E-03
indole-containing compound biosynthetic process (GO:0042435)	50	10	2.78	+	3.59	1.09E-03	2.66E-02
sulfur compound metabolic process (GO:0006790)	378	74	21.05	+	3.52	3.33E-18	1.97E-15
response to karrikin (GO:0080167)	129	25	7.18	+	3.48	5.23E-07	4.24E-05
plant-type cell wall organization or biogenesis (GO:0071669)	229	44	12.75	+	3.45	3.77E-11	6.56E-09
plant-type cell wall biogenesis (GO:0009832)	142	27	7.91	+	3.41	2.60E-07	2.40E-05
ATP generation from ADP (GO:0006757)	58	11	3.23	+	3.41	9.22E-04	2.37E-02
serine family amino acid metabolic process (GO:0009069)	58	11	3.23	+	3.41	9.22E-04	2.36E-02
glycolytic process (GO:0006096)	58	11	3.23	+	3.41	9.22E-04	2.35E-02
plant-type cell wall organization (GO:0009664)	117	22	6.52	+	3.38	3.80E-06	2.36E-04
nucleoside diphosphate phosphorylation (GO:0006165)	59	11	3.29	+	3.35	1.04E-03	2.57E-02
flavonoid biosynthetic process (GO:0009813)	59	11	3.29	+	3.35	1.04E-03	2.56E-02
vitamin metabolic process (GO:0006766)	81	15	4.51	+	3.33	1.48E-04	5.17E-03
amino acid transmembrane transport (GO:0003333)	54	10	3.01	+	3.33	1.82E-03	4.02E-02
drug transport (GO:0015893)	119	22	6.63	+	3.32	4.83E-06	2.88E-04
microtubule-based movement (GO:0007018)	65	12	3.62	+	3.32	6.77E-04	1.83E-02
inorganic anion transport (GO:0015698)	103	19	5.74	+	3.31	2.15E-05	1.05E-03
response to nematode (GO:0009624)	76	14	4.23	+	3.31	2.55E-04	8.24E-03
ADP metabolic process (GO:0046031)	60	11	3.34	+	3.29	1.18E-03	2.84E-02
purine ribonucleoside diphosphate metabolic process (GO:0009179)	60	11	3.34	+	3.29	1.18E-03	2.83E-02
purine nucleoside diphosphate metabolic process (GO:0009135)	60	11	3.34	+	3.29	1.18E-03	2.81E-02
cell wall modification (GO:0042545)	120	22	6.68	+	3.29	5.43E-06	3.12E-04
ribonucleoside diphosphate metabolic process (GO:0009185)	62	11	3.45	+	3.19	1.48E-03	3.43E-02
vitamin biosynthetic process (GO:0009110)	68	12	3.79	+	3.17	9.60E-04	2.42E-02
indole-containing compound metabolic process (GO:0042430)	91	16	5.07	+	3.16	1.53E-04	5.33E-03
carboxylic acid transmembrane transport (GO:1905039)	80	14	4.46	+	3.14	4.04E-04	1.23E-02
organic acid transmembrane transport (GO:1903825)	80	14	4.46	+	3.14	4.04E-04	1.22E-02
nucleotide phosphorylation (GO:0046939)	63	11	3.51	+	3.14	1.66E-03	3.78E-02
cellular transition metal ion homeostasis (GO:0046916)	63	11	3.51	+	3.14	1.66E-03	3.77E-02
alpha-amino acid catabolic process (GO:1901606)	69	12	3.84	+	3.12	1.07E-03	2.62E-02
cell wall organization (GO:0071555)	260	45	14.48	+	3.11	4.48E-10	6.02E-08
response to high light intensity (GO:0009644)	81	14	4.51	+	3.10	4.51E-04	1.35E-02
transition metal ion homeostasis (GO:0055076)	93	16	5.18	+	3.09	1.91E-04	6.38E-03
glucan biosynthetic process (GO:0009250)	105	18	5.85	+	3.08	8.12E-05	3.20E-03
nucleoside diphosphate metabolic process (GO:0009132)	66	11	3.68	+	2.99	2.30E-03	4.86E-02
transmembrane receptor protein tyrosine kinase signaling pathway (GO:0007169)	127	21	7.07	+	2.97	3.44E-05	1.52E-03
cell wall biogenesis (GO:0042546)	195	32	10.86	+	2.95	4.07E-07	3.34E-05
phenylpropanoid biosynthetic process (GO:0009699)	116	19	6.46	+	2.94	8.93E-05	3.50E-03
enzyme linked receptor protein signaling pathway (GO:0007167)	129	21	7.18	+	2.92	4.22E-05	1.77E-03
DNA conformation change (GO:0071103)	99	16	5.51	+	2.90	3.56E-04	1.11E-02
carbohydrate biosynthetic process (GO:0016051)	316	51	17.60	+	2.90	2.81E-10	4.05E-08
carbohydrate derivative catabolic process (GO:1901136)	87	14	4.85	+	2.89	8.44E-04	2.19E-02
pyruvate metabolic process (GO:0006090)	75	12	4.18	+	2.87	2.02E-03	4.38E-02
cell wall organization or biogenesis (GO:0071554)	430	68	23.95	+	2.84	7.00E-13	1.73E-10
cellular carbohydrate biosynthetic process (GO:0034637)	204	32	11.36	+	2.82	9.78E-07	7.32E-05
polysaccharide biosynthetic process (GO:0000271)	180	28	10.02	+	2.79	5.23E-06	3.06E-04
external encapsulating structure organization (GO:0045229)	296	46	16.48	+	2.79	5.92E-09	7.14E-07
response to UV (GO:0009411)	123	19	6.85	+	2.77	1.76E-04	6.02E-03
hormone transport (GO:0009914)	91	14	5.07	+	2.76	1.24E-03	2.93E-02
cellular amino acid biosynthetic process (GO:0008652)	202	31	11.25	+	2.76	2.15E-06	1.43E-04
cell surface receptor signaling pathway (GO:0007166)	137	21	7.63	+	2.75	9.09E-05	3.51E-03
amine metabolic process (GO:0009308)	111	17	6.18	+	2.75	4.13E-04	1.24E-02
cellular response to drug (GO:0035690)	86	13	4.79	+	2.71	2.10E-03	4.52E-02
cellular polysaccharide biosynthetic process (GO:0033692)	160	24	8.91	+	2.69	4.04E-05	1.73E-03
alpha-amino acid biosynthetic process (GO:1901607)	180	27	10.02	+	2.69	1.37E-05	7.07E-04
auxin transport (GO:0060918)	87	13	4.85	+	2.68	2.30E-03	4.89E-02
regulation of stomatal movement (GO:0010119)	87	13	4.85	+	2.68	2.30E-03	4.87E-02
carbohydrate derivative metabolic process (GO:1901135)	671	97	37.37	+	2.60	1.81E-15	7.15E-13
movement of cell or subcellular component (GO:0006928)	97	14	5.40	+	2.59	2.12E-03	4.55E-02
alpha-amino acid metabolic process (GO:1901605)	271	39	15.09	+	2.58	5.29E-07	4.23E-05
cell division (GO:0051301)	287	41	15.98	+	2.57	3.12E-07	2.76E-05
drug metabolic process (GO:0017144)	409	58	22.78	+	2.55	1.64E-09	2.06E-07
organic acid biosynthetic process (GO:0016053)	464	65	25.84	+	2.52	3.57E-10	5.02E-08
carboxylic acid biosynthetic process (GO:0046394)	464	65	25.84	+	2.52	3.57E-10	4.91E-08
mitotic cell cycle process (GO:1903047)	143	20	7.96	+	2.51	5.31E-04	1.51E-02
oxoacid metabolic process (GO:0043436)	1009	140	56.19	+	2.49	1.47E-20	1.45E-17
organic acid metabolic process (GO:0006082)	1011	140	56.30	+	2.49	1.65E-20	1.39E-17
regulation of meristem development (GO:0048509)	123	17	6.85	+	2.48	1.65E-03	3.78E-02
response to red or far red light (GO:0009639)	215	29	11.97	+	2.42	6.46E-05	2.60E-03
carbohydrate derivative biosynthetic process (GO:1901137)	357	48	19.88	+	2.41	2.24E-07	2.11E-05
anion transport (GO:0006820)	291	39	16.21	+	2.41	2.63E-06	1.71E-04
response to metal ion (GO:0010038)	478	64	26.62	+	2.40	2.28E-09	2.81E-07
small molecule biosynthetic process (GO:0044283)	629	83	35.03	+	2.37	1.27E-11	2.27E-09
cellular glucan metabolic process (GO:0006073)	160	21	8.91	+	2.36	6.53E-04	1.78E-02
generation of precursor metabolites and energy (GO:0006091)	352	46	19.60	+	2.35	6.68E-07	5.20E-05
cellular amino acid metabolic process (GO:0006520)	377	49	21.00	+	2.33	3.08E-07	2.76E-05
response to wounding (GO:0009611)	216	28	12.03	+	2.33	1.24E-04	4.43E-03
organelle localization (GO:0051640)	141	18	7.85	+	2.29	2.06E-03	4.44E-02
response to cadmium ion (GO:0046686)	345	44	19.21	+	2.29	1.93E-06	1.30E-04
cell growth (GO:0016049)	362	46	20.16	+	2.28	1.63E-06	1.13E-04
nucleobase-containing small molecule metabolic process (GO:0055086)	363	46	20.22	+	2.28	1.69E-06	1.16E-04
glucan metabolic process (GO:0044042)	168	21	9.36	+	2.24	1.45E-03	3.38E-02
developmental growth involved in morphogenesis (GO:0060560)	321	40	17.88	+	2.24	1.30E-05	6.73E-04
response to light stimulus (GO:0009416)	739	91	41.16	+	2.21	4.43E-11	7.49E-09
unidimensional cell growth (GO:0009826)	278	34	15.48	+	2.20	6.13E-05	2.48E-03
organic anion transport (GO:0015711)	173	21	9.63	+	2.18	1.78E-03	3.95E-02
response to radiation (GO:0009314)	760	92	42.32	+	2.17	8.08E-11	1.33E-08
carboxylic acid metabolic process (GO:0019752)	864	104	48.12	+	2.16	4.87E-12	9.28E-10
response to bacterium (GO:0009617)	493	59	27.46	+	2.15	3.53E-07	3.03E-05
polysaccharide metabolic process (GO:0005976)	302	36	16.82	+	2.14	6.70E-05	2.68E-03
purine-containing compound metabolic process (GO:0072521)	211	25	11.75	+	2.13	1.02E-03	2.53E-02
mitotic cell cycle (GO:0000278)	220	26	12.25	+	2.12	7.87E-04	2.08E-02
growth (GO:0040007)	416	49	23.17	+	2.12	4.74E-06	2.86E-04
small molecule metabolic process (GO:0044281)	1504	177	83.76	+	2.11	7.50E-19	4.93E-16
defense response to bacterium (GO:0042742)	393	46	21.89	+	2.10	1.18E-05	6.19E-04
response to cytokinin (GO:0009735)	231	27	12.86	+	2.10	6.69E-04	1.81E-02
developmental growth (GO:0048589)	370	43	20.61	+	2.09	2.99E-05	1.37E-03
regulation of hormone levels (GO:0010817)	407	47	22.67	+	2.07	1.09E-05	5.75E-04
methylation (GO:0032259)	278	32	15.48	+	2.07	2.89E-04	9.28E-03
root morphogenesis (GO:0010015)	252	29	14.03	+	2.07	6.39E-04	1.76E-02
root development (GO:0048364)	467	53	26.01	+	2.04	6.02E-06	3.43E-04
cellular polysaccharide metabolic process (GO:0044264)	238	27	13.25	+	2.04	1.23E-03	2.90E-02
root system development (GO:0022622)	469	53	26.12	+	2.03	6.31E-06	3.49E-04
response to cold (GO:0009409)	428	48	23.84	+	2.01	1.78E-05	8.93E-04
organic cyclic compound biosynthetic process (GO:1901362)	871	97	48.51	+	2.00	1.26E-09	1.62E-07
cellular carbohydrate metabolic process (GO:0044262)	344	38	19.16	+	1.98	1.87E-04	6.27E-03
response to external biotic stimulus (GO:0043207)	988	109	55.02	+	1.98	2.14E-10	3.33E-08
response to other organism (GO:0051707)	988	109	55.02	+	1.98	2.14E-10	3.24E-08
response to biotic stimulus (GO:0009607)	989	109	55.08	+	1.98	2.19E-10	3.24E-08
response to fungus (GO:0009620)	310	34	17.26	+	1.97	5.61E-04	1.58E-02
plant organ morphogenesis (GO:1905392)	386	42	21.50	+	1.95	1.15E-04	4.16E-03
aromatic compound biosynthetic process (GO:0019438)	757	81	42.16	+	1.92	1.63E-07	1.58E-05
chemical homeostasis (GO:0048878)	393	42	21.89	+	1.92	1.96E-04	6.44E-03
cofactor metabolic process (GO:0051186)	375	40	20.88	+	1.92	2.33E-04	7.60E-03
carbohydrate metabolic process (GO:0005975)	808	86	45.00	+	1.91	7.59E-08	7.61E-06
defense response to other organism (GO:0098542)	682	72	37.98	+	1.90	1.29E-06	9.16E-05
response to external stimulus (GO:0009605)	1387	146	77.24	+	1.89	3.69E-12	8.08E-10
cell morphogenesis (GO:0000902)	365	38	20.33	+	1.87	6.52E-04	1.78E-02
anatomical structure morphogenesis (GO:0009653)	854	87	47.56	+	1.83	3.67E-07	3.06E-05
biosynthetic process (GO:0009058)	2782	280	154.93	+	1.81	1.04E-20	1.23E-17
response to inorganic substance (GO:0010035)	945	95	52.63	+	1.81	1.95E-07	1.86E-05
monocarboxylic acid metabolic process (GO:0032787)	429	43	23.89	+	1.80	5.41E-04	1.53E-02
organic substance biosynthetic process (GO:1901576)	2664	267	148.36	+	1.80	1.77E-19	1.31E-16
oxidation-reduction process (GO:0055114)	942	94	52.46	+	1.79	2.83E-07	2.58E-05
response to abiotic stimulus (GO:0009628)	2099	208	116.89	+	1.78	1.03E-14	3.04E-12
ion transport (GO:0006811)	658	65	36.64	+	1.77	3.11E-05	1.42E-03
cellular component morphogenesis (GO:0032989)	401	39	22.33	+	1.75	1.67E-03	3.76E-02
heterocycle biosynthetic process (GO:0018130)	657	63	36.59	+	1.72	9.11E-05	3.50E-03
cellular biosynthetic process (GO:0044249)	2518	241	140.23	+	1.72	2.01E-15	7.42E-13
regulation of biological quality (GO:0065008)	1131	108	62.99	+	1.71	3.29E-07	2.86E-05
cell cycle (GO:0007049)	494	47	27.51	+	1.71	8.77E-04	2.27E-02
response to chemical (GO:0042221)	2776	260	154.60	+	1.68	1.31E-15	5.53E-13
defense response (GO:0006952)	1145	107	63.77	+	1.68	7.92E-07	6.01E-05
transmembrane transport (GO:0055085)	687	64	38.26	+	1.67	1.78E-04	6.06E-03
organophosphate metabolic process (GO:0019637)	494	46	27.51	+	1.67	1.72E-03	3.84E-02
multi-organism process (GO:0051704)	1482	137	82.53	+	1.66	4.44E-08	4.60E-06
response to drug (GO:0042493)	593	54	33.02	+	1.64	9.31E-04	2.36E-02
plant organ development (GO:0099402)	945	86	52.63	+	1.63	2.61E-05	1.21E-03
organonitrogen compound biosynthetic process (GO:1901566)	1320	120	73.51	+	1.63	6.25E-07	4.93E-05
homeostatic process (GO:0042592)	540	49	30.07	+	1.63	1.97E-03	4.32E-02
response to stimulus (GO:0050896)	5729	506	319.05	+	1.59	5.29E-27	3.13E-23
cellular developmental process (GO:0048869)	872	75	48.56	+	1.54	4.84E-04	1.40E-02
response to endogenous stimulus (GO:0009719)	1615	137	89.94	+	1.52	3.35E-06	2.13E-04
response to hormone (GO:0009725)	1599	135	89.05	+	1.52	5.11E-06	3.02E-04
phosphorus metabolic process (GO:0006793)	1718	143	95.68	+	1.49	6.16E-06	3.44E-04
organic cyclic compound metabolic process (GO:1901360)	2599	215	144.74	+	1.49	2.02E-08	2.25E-06
response to organic substance (GO:0010033)	1915	158	106.65	+	1.48	2.52E-06	1.65E-04
system development (GO:0048731)	1830	150	101.91	+	1.47	6.95E-06	3.74E-04
response to oxygen-containing compound (GO:1901700)	1595	130	88.83	+	1.46	3.76E-05	1.65E-03
establishment of localization (GO:0051234)	2215	178	123.35	+	1.44	2.68E-06	1.72E-04
response to stress (GO:0006950)	3157	253	175.81	+	1.44	1.30E-08	1.51E-06
localization (GO:0051179)	2359	189	131.37	+	1.44	1.31E-06	9.25E-05
anatomical structure development (GO:0048856)	2965	236	165.12	+	1.43	7.45E-08	7.60E-06
multicellular organism development (GO:0007275)	2613	206	145.52	+	1.42	1.25E-06	9.04E-05
cellular aromatic compound metabolic process (GO:0006725)	2485	195	138.39	+	1.41	3.49E-06	2.20E-04
metabolic process (GO:0008152)	8180	640	455.55	+	1.40	3.23E-22	6.36E-19
response to acid chemical (GO:0001101)	1178	92	65.60	+	1.40	2.02E-03	4.38E-02
transport (GO:0006810)	2171	169	120.90	+	1.40	2.60E-05	1.21E-03
multicellular organismal process (GO:0032501)	2853	222	158.89	+	1.40	1.08E-06	7.98E-05
organic substance metabolic process (GO:0071704)	7341	568	408.82	+	1.39	7.05E-18	3.79E-15
post-embryonic development (GO:0009791)	1477	114	82.25	+	1.39	9.77E-04	2.44E-02
cellular metabolic process (GO:0044237)	7144	550	397.85	+	1.38	1.05E-16	5.15E-14
developmental process (GO:0032502)	3147	242	175.26	+	1.38	7.08E-07	5.44E-05
phosphate-containing compound metabolic process (GO:0006796)	1678	128	93.45	+	1.37	6.05E-04	1.68E-02
organonitrogen compound metabolic process (GO:1901564)	4219	321	234.96	+	1.37	1.58E-08	1.79E-06
cellular process (GO:0009987)	10275	775	572.22	+	1.35	1.76E-24	5.22E-21
cellular component organization or biogenesis (GO:0071840)	2836	212	157.94	+	1.34	2.60E-05	1.22E-03
cellular response to stimulus (GO:0051716)	2332	174	129.87	+	1.34	1.79E-04	6.03E-03
cellular component organization (GO:0016043)	2481	181	138.17	+	1.31	3.79E-04	1.17E-02
nitrogen compound metabolic process (GO:0006807)	5737	408	319.50	+	1.28	1.56E-07	1.54E-05
heterocycle metabolic process (GO:0046483)	2340	166	130.32	+	1.27	2.34E-03	4.93E-02
cellular nitrogen compound metabolic process (GO:0034641)	2857	200	159.11	+	1.26	1.32E-03	3.10E-02
primary metabolic process (GO:0044238)	6595	457	367.28	+	1.24	3.64E-07	3.08E-05
biological regulation (GO:0065007)	5678	369	316.21	+	1.17	1.53E-03	3.52E-02
Unclassified (UNCLASSIFIED)	6353	279	353.80	-	.79	6.59E-06	3.58E-04
protein modification by small protein conjugation or removal (GO:0070647)	487	11	27.12	-	.41	1.09E-03	2.65E-02
ubiquitin-dependent protein catabolic process (GO:0006511)	451	9	25.12	-	.36	4.70E-04	1.37E-02
modification-dependent protein catabolic process (GO:0019941)	464	9	25.84	-	.35	3.64E-04	1.13E-02
modification-dependent macromolecule catabolic process (GO:0043632)	474	9	26.40	-	.34	1.95E-04	6.49E-03
cellular respiration (GO:0045333)	123	0	6.85	-	< 0.01	2.01E-03	4.40E-02
energy derivation by oxidation of organic compounds (GO:0015980)	136	0	7.57	-	< 0.01	1.45E-03	3.37E-02
mitochondrion organization (GO:0007005)	166	0	9.24	-	< 0.01	3.05E-04	9.69E-03

## Sheet: Panther Mutant up
Supplementary Data 1. Lists of differentially expressed genes and the associated over- and under-represented Biological Processes. Raw Panther results for up-regulated genes in mutant.
Analysis Type:	PANTHER Overrepresentation Test (Released 20190517)
Annotation Version and Release Date:	GO Ontology database Released 2019-02-02
Analyzed List:	upload_1 (Arabidopsis thaliana)
Reference List:	Arabidopsis thaliana (all genes in database)
Test Type:	FISHER
Correction:	FDR
GO biological process complete	Arabidopsis thaliana - REFLIST (27581)	upload_1 (1479)	upload_1 (expected)	upload_1 (over/under)	upload_1 (fold Enrichment)	upload_1 (raw P-value)	upload_1 (FDR)
endoplasmic reticulum to cytosol transport (GO:1903513)	7	5	.38	+	13.32	1.99E-04	1.53E-02
retrograde protein transport, ER to cytosol (GO:0030970)	7	5	.38	+	13.32	1.99E-04	1.51E-02
cellular response to unfolded protein (GO:0034620)	35	19	1.88	+	10.12	7.95E-12	2.04E-09
response to unfolded protein (GO:0006986)	35	19	1.88	+	10.12	7.95E-12	1.96E-09
cellular response to topologically incorrect protein (GO:0035967)	54	25	2.90	+	8.63	6.68E-14	3.29E-11
cellular response to heat (GO:0034605)	67	31	3.59	+	8.63	6.82E-17	4.48E-14
endoplasmic reticulum unfolded protein response (GO:0030968)	18	8	.97	+	8.29	3.03E-05	3.20E-03
'de novo' protein folding (GO:0006458)	57	25	3.06	+	8.18	1.74E-13	6.44E-11
response to topologically incorrect protein (GO:0035966)	58	25	3.11	+	8.04	2.37E-13	7.80E-11
chaperone cofactor-dependent protein refolding (GO:0051085)	47	20	2.52	+	7.94	6.99E-11	1.43E-08
'de novo' posttranslational protein folding (GO:0051084)	47	20	2.52	+	7.94	6.99E-11	1.38E-08
positive regulation of transcription from RNA polymerase II promoter in response to stress (GO:0036003)	24	10	1.29	+	7.77	4.83E-06	5.71E-04
positive regulation of transcription from RNA polymerase II promoter in response to heat stress (GO:0061408)	24	10	1.29	+	7.77	4.83E-06	5.60E-04
heat acclimation (GO:0010286)	48	20	2.57	+	7.77	9.44E-11	1.74E-08
regulation of DNA-templated transcription in response to stress (GO:0043620)	29	12	1.56	+	7.72	5.76E-07	7.57E-05
response to hydrogen peroxide (GO:0042542)	78	32	4.18	+	7.65	3.34E-16	1.98E-13
protein refolding (GO:0042026)	48	19	2.57	+	7.38	5.55E-10	8.64E-08
chaperone-mediated protein folding (GO:0061077)	61	24	3.27	+	7.34	3.39E-12	9.12E-10
regulation of transcription from RNA polymerase II promoter in response to stress (GO:0043618)	28	11	1.50	+	7.33	2.56E-06	3.15E-04
response to heat (GO:0009408)	220	86	11.80	+	7.29	5.05E-40	2.99E-36
response to high light intensity (GO:0009644)	81	29	4.34	+	6.68	1.36E-13	6.17E-11
response to endoplasmic reticulum stress (GO:0034976)	73	23	3.91	+	5.88	3.62E-10	5.78E-08
protein complex oligomerization (GO:0051259)	49	15	2.63	+	5.71	5.60E-07	7.52E-05
protein folding (GO:0006457)	264	71	14.16	+	5.02	4.99E-25	9.84E-22
ubiquitin-dependent ERAD pathway (GO:0030433)	30	8	1.61	+	4.97	5.50E-04	3.61E-02
ERAD pathway (GO:0036503)	42	11	2.25	+	4.88	6.04E-05	5.86E-03
response to light intensity (GO:0009642)	156	38	8.37	+	4.54	6.75E-13	2.00E-10
response to reactive oxygen species (GO:0000302)	176	41	9.44	+	4.34	2.95E-13	9.17E-11
response to toxic substance (GO:0009636)	207	45	11.10	+	4.05	1.71E-13	6.74E-11
response to temperature stimulus (GO:0009266)	622	119	33.35	+	3.57	2.97E-29	8.78E-26
response to antibiotic (GO:0046677)	304	51	16.30	+	3.13	2.34E-11	5.53E-09
regulation of abscisic acid-activated signaling pathway (GO:0009787)	106	17	5.68	+	2.99	1.68E-04	1.36E-02
regulation of cellular response to alcohol (GO:1905957)	106	17	5.68	+	2.99	1.68E-04	1.34E-02
regulation of response to alcohol (GO:1901419)	106	17	5.68	+	2.99	1.68E-04	1.33E-02
response to oxidative stress (GO:0006979)	425	67	22.79	+	2.94	2.28E-13	7.94E-11
response to water deprivation (GO:0009414)	346	53	18.55	+	2.86	1.86E-10	3.05E-08
response to water (GO:0009415)	353	54	18.93	+	2.85	1.31E-10	2.28E-08
response to organonitrogen compound (GO:0010243)	232	35	12.44	+	2.81	3.03E-07	4.38E-05
response to chitin (GO:0010200)	137	20	7.35	+	2.72	1.47E-04	1.24E-02
response to osmotic stress (GO:0006970)	666	92	35.71	+	2.58	1.32E-14	7.11E-12
response to inorganic substance (GO:0010035)	945	127	50.67	+	2.51	5.41E-19	4.57E-16
mitochondrion organization (GO:0007005)	166	22	8.90	+	2.47	2.97E-04	2.12E-02
response to abscisic acid (GO:0009737)	554	73	29.71	+	2.46	4.50E-11	9.86E-09
response to alcohol (GO:0097305)	558	73	29.92	+	2.44	8.20E-11	1.57E-08
cellular response to abscisic acid stimulus (GO:0071215)	199	26	10.67	+	2.44	9.41E-05	8.56E-03
cellular response to alcohol (GO:0097306)	199	26	10.67	+	2.44	9.41E-05	8.43E-03
response to nitrogen compound (GO:1901698)	307	40	16.46	+	2.43	1.59E-06	1.99E-04
abscisic acid-activated signaling pathway (GO:0009738)	169	22	9.06	+	2.43	3.51E-04	2.44E-02
response to drug (GO:0042493)	593	77	31.80	+	2.42	2.70E-11	6.14E-09
response to salt stress (GO:0009651)	590	75	31.64	+	2.37	1.47E-10	2.49E-08
proteasomal protein catabolic process (GO:0010498)	212	25	11.37	+	2.20	5.34E-04	3.55E-02
response to lipid (GO:0033993)	751	85	40.27	+	2.11	1.24E-09	1.88E-07
response to oxygen-containing compound (GO:1901700)	1595	180	85.53	+	2.10	3.30E-19	3.90E-16
response to abiotic stimulus (GO:0009628)	2099	235	112.56	+	2.09	1.19E-24	1.76E-21
cellular response to stress (GO:0033554)	925	102	49.60	+	2.06	1.07E-10	1.92E-08
response to cadmium ion (GO:0046686)	345	38	18.50	+	2.05	8.97E-05	8.29E-03
cellular response to organic substance (GO:0071310)	765	81	41.02	+	1.97	4.75E-08	7.02E-06
response to acid chemical (GO:0001101)	1178	122	63.17	+	1.93	6.28E-11	1.33E-08
response to metal ion (GO:0010038)	478	48	25.63	+	1.87	1.18E-04	1.04E-02
response to cold (GO:0009409)	428	42	22.95	+	1.83	4.24E-04	2.88E-02
response to organic substance (GO:0010033)	1915	185	102.69	+	1.80	1.43E-13	6.05E-11
cellular response to chemical stimulus (GO:0070887)	963	93	51.64	+	1.80	3.16E-07	4.45E-05
response to light stimulus (GO:0009416)	739	70	39.63	+	1.77	1.50E-05	1.64E-03
response to chemical (GO:0042221)	2776	262	148.86	+	1.76	4.13E-18	3.05E-15
response to stress (GO:0006950)	3157	292	169.29	+	1.72	3.59E-19	3.54E-16
response to radiation (GO:0009314)	760	70	40.75	+	1.72	3.82E-05	3.90E-03
regulation of response to stimulus (GO:0048583)	679	61	36.41	+	1.68	2.42E-04	1.82E-02
negative regulation of cellular process (GO:0048523)	694	60	37.21	+	1.61	7.24E-04	4.65E-02
response to hormone (GO:0009725)	1599	136	85.74	+	1.59	4.67E-07	6.42E-05
response to endogenous stimulus (GO:0009719)	1615	136	86.60	+	1.57	7.21E-07	9.28E-05
positive regulation of biological process (GO:0048518)	1271	104	68.16	+	1.53	5.35E-05	5.36E-03
cellular response to stimulus (GO:0051716)	2332	178	125.05	+	1.42	4.84E-06	5.51E-04
response to stimulus (GO:0050896)	5729	425	307.21	+	1.38	1.82E-12	5.13E-10
regulation of RNA metabolic process (GO:0051252)	2186	156	117.22	+	1.33	4.89E-04	3.29E-02
regulation of nucleobase-containing compound metabolic process (GO:0019219)	2242	158	120.22	+	1.31	8.03E-04	5.00E-02
regulation of cellular metabolic process (GO:0031323)	2865	201	153.63	+	1.31	1.54E-04	1.26E-02
regulation of gene expression (GO:0010468)	2498	174	133.95	+	1.30	7.30E-04	4.65E-02
regulation of metabolic process (GO:0019222)	3115	213	167.04	+	1.28	4.22E-04	2.90E-02
regulation of biological process (GO:0050789)	4997	337	267.96	+	1.26	1.16E-05	1.29E-03
regulation of cellular process (GO:0050794)	4393	294	235.57	+	1.25	8.73E-05	8.19E-03
biological regulation (GO:0065007)	5678	374	304.48	+	1.23	2.19E-05	2.36E-03
biosynthetic process (GO:0009058)	2782	105	149.18	-	.70	1.21E-04	1.05E-02
organic substance biosynthetic process (GO:1901576)	2664	100	142.85	-	.70	1.30E-04	1.11E-02
cellular biosynthetic process (GO:0044249)	2518	91	135.02	-	.67	5.69E-05	5.61E-03
cellular nitrogen compound biosynthetic process (GO:0044271)	1211	39	64.94	-	.60	7.62E-04	4.79E-02
organonitrogen compound biosynthetic process (GO:1901566)	1320	42	70.78	-	.59	3.05E-04	2.15E-02
cellular amide metabolic process (GO:0043603)	755	20	40.49	-	.49	6.40E-04	4.16E-02
amide biosynthetic process (GO:0043604)	615	13	32.98	-	.39	1.51E-04	1.25E-02
ribosome biogenesis (GO:0042254)	381	4	20.43	-	.20	3.22E-05	3.34E-03
ncRNA processing (GO:0034470)	323	3	17.32	-	.17	6.75E-05	6.44E-03
ncRNA metabolic process (GO:0034660)	391	3	20.97	-	.14	4.22E-06	5.10E-04
rRNA processing (GO:0006364)	214	1	11.48	-	.09	2.66E-04	1.97E-02
sexual reproduction (GO:0019953)	216	1	11.58	-	.09	2.69E-04	1.96E-02
rRNA metabolic process (GO:0016072)	220	1	11.80	-	.08	2.84E-04	2.05E-02
multi-organism reproductive process (GO:0044703)	223	1	11.96	-	.08	1.84E-04	1.43E-02

## Sheet: Panther mutant down
Supplementary Data 1. Lists of differentially expressed genes and the associated over- and under-represented Biological Processes. Raw Panther results for down-regulated genes in mutant.
Analysis Type:	PANTHER Overrepresentation Test (Released 20190517)
Annotation Version and Release Date:	GO Ontology database Released 2019-02-02
Analyzed List:	upload_1 (Arabidopsis thaliana)
Reference List:	Arabidopsis thaliana (all genes in database)
Test Type:	FISHER
Correction:	FDR
GO biological process complete	Arabidopsis thaliana - REFLIST (27581)	upload_1 (1503)	upload_1 (expected)	upload_1 (over/under)	upload_1 (fold Enrichment)	upload_1 (raw P-value)	upload_1 (FDR)
indole glucosinolate catabolic process (GO:0042344)	5	4	.27	+	14.68	7.26E-04	2.36E-02
indole glucosinolate biosynthetic process (GO:0009759)	6	4	.33	+	12.23	1.16E-03	3.50E-02
defense response by callose deposition in cell wall (GO:0052544)	16	9	.87	+	10.32	2.47E-06	1.70E-04
indole-containing compound catabolic process (GO:0042436)	11	6	.60	+	10.01	1.42E-04	5.89E-03
photosynthesis, light harvesting in photosystem I (GO:0009768)	24	13	1.31	+	9.94	1.98E-08	2.54E-06
defense response by cell wall thickening (GO:0052482)	17	9	.93	+	9.72	3.60E-06	2.37E-04
defense response by callose deposition (GO:0052542)	19	10	1.04	+	9.66	1.07E-06	8.55E-05
S-adenosylmethionine metabolic process (GO:0046500)	10	5	.54	+	9.18	7.11E-04	2.34E-02
photosynthesis, light harvesting in photosystem II (GO:0009769)	10	5	.54	+	9.18	7.11E-04	2.32E-02
S-glycoside biosynthetic process (GO:0016144)	42	20	2.29	+	8.74	1.87E-11	3.68E-09
glucosinolate biosynthetic process (GO:0019761)	42	20	2.29	+	8.74	1.87E-11	3.56E-09
glycosinolate biosynthetic process (GO:0019758)	42	20	2.29	+	8.74	1.87E-11	3.45E-09
protein-chromophore linkage (GO:0018298)	28	12	1.53	+	7.86	5.03E-07	4.50E-05
glycosyl compound biosynthetic process (GO:1901659)	63	25	3.43	+	7.28	1.45E-12	3.06E-10
response to zinc ion (GO:0010043)	42	16	2.29	+	6.99	2.43E-08	3.06E-06
phloem transport (GO:0010233)	21	8	1.14	+	6.99	8.08E-05	3.62E-03
vascular transport (GO:0010232)	21	8	1.14	+	6.99	8.08E-05	3.59E-03
syncytium formation (GO:0006949)	16	6	.87	+	6.88	6.87E-04	2.27E-02
callose deposition in cell wall (GO:0052543)	27	10	1.47	+	6.80	1.27E-05	7.24E-04
cell wall thickening (GO:0052386)	29	10	1.58	+	6.33	2.12E-05	1.12E-03
ribosomal large subunit assembly (GO:0000027)	42	14	2.29	+	6.12	6.85E-07	5.96E-05
callose localization (GO:0052545)	34	11	1.85	+	5.94	1.35E-05	7.53E-04
response to desiccation (GO:0009269)	22	7	1.20	+	5.84	5.55E-04	1.88E-02
response to low light intensity stimulus (GO:0009645)	19	6	1.04	+	5.79	1.43E-03	4.18E-02
plant-type cell wall modification involved in multidimensional cell growth (GO:0009831)	29	9	1.58	+	5.70	1.07E-04	4.63E-03
indole glucosinolate metabolic process (GO:0042343)	36	11	1.96	+	5.61	2.11E-05	1.12E-03
photosynthesis, light harvesting (GO:0009765)	46	14	2.51	+	5.58	1.68E-06	1.19E-04
purine ribonucleoside metabolic process (GO:0046128)	30	9	1.63	+	5.51	1.33E-04	5.66E-03
polysaccharide localization (GO:0033037)	37	11	2.02	+	5.46	2.61E-05	1.32E-03
amine biosynthetic process (GO:0009309)	44	13	2.40	+	5.42	5.17E-06	3.29E-04
cellular biogenic amine biosynthetic process (GO:0042401)	44	13	2.40	+	5.42	5.17E-06	3.25E-04
response to far red light (GO:0010218)	51	15	2.78	+	5.40	1.04E-06	8.51E-05
cell wall modification involved in multidimensional cell growth (GO:0042547)	31	9	1.69	+	5.33	1.64E-04	6.59E-03
cellular biogenic amine metabolic process (GO:0006576)	60	17	3.27	+	5.20	3.13E-07	3.14E-05
cellular amine metabolic process (GO:0044106)	60	17	3.27	+	5.20	3.13E-07	3.08E-05
nucleotide-sugar biosynthetic process (GO:0009226)	36	10	1.96	+	5.10	9.75E-05	4.30E-03
response to red light (GO:0010114)	69	19	3.76	+	5.05	9.36E-08	1.03E-05
purine nucleoside metabolic process (GO:0042278)	33	9	1.80	+	5.00	2.43E-04	9.47E-03
nucleotide-sugar metabolic process (GO:0009225)	56	15	3.05	+	4.92	2.77E-06	1.86E-04
sulfur compound biosynthetic process (GO:0044272)	142	38	7.74	+	4.91	9.09E-14	2.69E-11
S-glycoside metabolic process (GO:0016143)	137	36	7.47	+	4.82	6.39E-13	1.51E-10
glucosinolate metabolic process (GO:0019760)	137	36	7.47	+	4.82	6.39E-13	1.45E-10
glycosinolate metabolic process (GO:0019757)	137	36	7.47	+	4.82	6.39E-13	1.40E-10
indole-containing compound biosynthetic process (GO:0042435)	50	13	2.72	+	4.77	1.66E-05	9.07E-04
translational elongation (GO:0006414)	47	12	2.56	+	4.69	4.05E-05	1.96E-03
secondary metabolite biosynthetic process (GO:0044550)	180	45	9.81	+	4.59	4.03E-15	2.16E-12
ammonium ion metabolic process (GO:0097164)	40	10	2.18	+	4.59	2.04E-04	8.03E-03
plant-type cell wall loosening (GO:0009828)	38	9	2.07	+	4.35	5.89E-04	1.97E-02
indole-containing compound metabolic process (GO:0042430)	91	21	4.96	+	4.23	2.59E-07	2.74E-05
serine family amino acid biosynthetic process (GO:0009070)	48	11	2.62	+	4.21	1.92E-04	7.65E-03
ribosome assembly (GO:0042255)	84	19	4.58	+	4.15	1.23E-06	9.00E-05
glycosyl compound metabolic process (GO:1901657)	205	46	11.17	+	4.12	5.94E-14	1.95E-11
ribonucleoside metabolic process (GO:0009119)	41	9	2.23	+	4.03	9.43E-04	3.00E-02
second-messenger-mediated signaling (GO:0019932)	46	10	2.51	+	3.99	5.33E-04	1.81E-02
ribosomal large subunit biogenesis (GO:0042273)	92	20	5.01	+	3.99	1.12E-06	8.68E-05
response to karrikin (GO:0080167)	129	28	7.03	+	3.98	8.88E-09	1.25E-06
phenylpropanoid metabolic process (GO:0009698)	141	30	7.68	+	3.90	3.95E-09	6.15E-07
toxin metabolic process (GO:0009404)	71	15	3.87	+	3.88	3.18E-05	1.60E-03
secondary metabolic process (GO:0019748)	371	77	20.22	+	3.81	1.07E-20	1.05E-17
plant-type cell wall modification (GO:0009827)	59	12	3.22	+	3.73	2.61E-04	9.91E-03
amine metabolic process (GO:0009308)	111	22	6.05	+	3.64	1.28E-06	9.22E-05
response to high light intensity (GO:0009644)	81	16	4.41	+	3.62	3.59E-05	1.77E-03
maturation of SSU-rRNA (GO:0030490)	51	10	2.78	+	3.60	1.07E-03	3.27E-02
cell wall modification (GO:0042545)	120	23	6.54	+	3.52	1.23E-06	9.06E-05
serine family amino acid metabolic process (GO:0009069)	58	11	3.16	+	3.48	7.79E-04	2.50E-02
sulfur compound catabolic process (GO:0044273)	53	10	2.89	+	3.46	1.38E-03	4.10E-02
regulation of secondary metabolic process (GO:0043455)	53	10	2.89	+	3.46	1.38E-03	4.08E-02
amino acid transmembrane transport (GO:0003333)	54	10	2.94	+	3.40	1.56E-03	4.48E-02
sulfur compound metabolic process (GO:0006790)	378	69	20.60	+	3.35	3.67E-16	2.71E-13
lignin metabolic process (GO:0009808)	73	13	3.98	+	3.27	4.58E-04	1.59E-02
flavonoid metabolic process (GO:0009812)	69	12	3.76	+	3.19	8.98E-04	2.87E-02
phenylpropanoid biosynthetic process (GO:0009699)	116	20	6.32	+	3.16	2.33E-05	1.21E-03
response to blue light (GO:0009637)	93	16	5.07	+	3.16	1.51E-04	6.16E-03
response to UV-B (GO:0010224)	71	12	3.87	+	3.10	1.12E-03	3.41E-02
ribosomal small subunit biogenesis (GO:0042274)	84	14	4.58	+	3.06	5.07E-04	1.75E-02
leaf morphogenesis (GO:0009965)	91	15	4.96	+	3.02	3.61E-04	1.30E-02
photosynthesis (GO:0015979)	189	31	10.30	+	3.01	3.99E-07	3.81E-05
carboxylic acid transmembrane transport (GO:1905039)	80	13	4.36	+	2.98	9.77E-04	3.08E-02
organic acid transmembrane transport (GO:1903825)	80	13	4.36	+	2.98	9.77E-04	3.06E-02
drug transmembrane transport (GO:0006855)	93	15	5.07	+	2.96	4.42E-04	1.55E-02
photosynthesis, light reaction (GO:0019684)	127	20	6.92	+	2.89	7.21E-05	3.33E-03
regulation of small molecule metabolic process (GO:0062012)	108	17	5.89	+	2.89	2.45E-04	9.47E-03
response to UV (GO:0009411)	123	19	6.70	+	2.83	1.35E-04	5.72E-03
drug transport (GO:0015893)	119	18	6.48	+	2.78	2.53E-04	9.71E-03
plant-type cell wall organization or biogenesis (GO:0071669)	229	34	12.48	+	2.72	8.71E-07	7.36E-05
plant-type cell wall biogenesis (GO:0009832)	142	21	7.74	+	2.71	1.07E-04	4.65E-03
ribosome biogenesis (GO:0042254)	381	56	20.76	+	2.70	4.72E-10	7.97E-08
cell wall organization (GO:0071555)	260	38	14.17	+	2.68	4.13E-07	3.88E-05
inorganic anion transport (GO:0015698)	103	15	5.61	+	2.67	1.13E-03	3.43E-02
translation (GO:0006412)	552	80	30.08	+	2.66	2.02E-13	5.69E-11
peptide biosynthetic process (GO:0043043)	557	80	30.35	+	2.64	2.57E-13	6.90E-11
peptide metabolic process (GO:0006518)	633	89	34.49	+	2.58	3.83E-14	1.33E-11
cell wall organization or biogenesis (GO:0071554)	430	60	23.43	+	2.56	6.99E-10	1.15E-07
alpha-amino acid biosynthetic process (GO:1901607)	180	25	9.81	+	2.55	8.04E-05	3.63E-03
cell wall biogenesis (GO:0042546)	195	27	10.63	+	2.54	4.12E-05	1.98E-03
amide biosynthetic process (GO:0043604)	615	84	33.51	+	2.51	6.15E-13	1.51E-10
external encapsulating structure organization (GO:0045229)	296	40	16.13	+	2.48	1.18E-06	8.86E-05
anion transmembrane transport (GO:0098656)	134	18	7.30	+	2.47	1.20E-03	3.60E-02
cellular amino acid biosynthetic process (GO:0008652)	202	27	11.01	+	2.45	6.34E-05	3.00E-03
cellular amide metabolic process (GO:0043603)	755	99	41.14	+	2.41	6.87E-14	2.14E-11
organic acid biosynthetic process (GO:0016053)	464	60	25.29	+	2.37	1.05E-08	1.45E-06
carboxylic acid biosynthetic process (GO:0046394)	464	60	25.29	+	2.37	1.05E-08	1.42E-06
organelle assembly (GO:0070925)	171	22	9.32	+	2.36	4.70E-04	1.63E-02
organonitrogen compound biosynthetic process (GO:1901566)	1320	168	71.93	+	2.34	7.27E-22	8.60E-19
response to fungus (GO:0009620)	310	39	16.89	+	2.31	7.20E-06	4.34E-04
alpha-amino acid metabolic process (GO:1901605)	271	34	14.77	+	2.30	3.62E-05	1.77E-03
response to cadmium ion (GO:0046686)	345	43	18.80	+	2.29	2.58E-06	1.75E-04
response to metal ion (GO:0010038)	478	59	26.05	+	2.27	5.68E-08	6.46E-06
carbohydrate derivative biosynthetic process (GO:1901137)	357	44	19.45	+	2.26	3.34E-06	2.22E-04
ribonucleoprotein complex biogenesis (GO:0022613)	463	57	25.23	+	2.26	1.08E-07	1.16E-05
oxoacid metabolic process (GO:0043436)	1009	123	54.98	+	2.24	5.06E-15	2.49E-12
organic acid metabolic process (GO:0006082)	1011	123	55.09	+	2.23	5.56E-15	2.53E-12
rRNA processing (GO:0006364)	214	26	11.66	+	2.23	3.51E-04	1.27E-02
response to cytokinin (GO:0009735)	231	28	12.59	+	2.22	3.11E-04	1.14E-02
small molecule biosynthetic process (GO:0044283)	629	76	34.28	+	2.22	1.44E-09	2.29E-07
response to cold (GO:0009409)	428	51	23.32	+	2.19	1.11E-06	8.74E-05
rRNA metabolic process (GO:0016072)	220	26	11.99	+	2.17	6.70E-04	2.23E-02
cellular amino acid metabolic process (GO:0006520)	377	44	20.54	+	2.14	1.06E-05	6.21E-04
defense response to fungus (GO:0050832)	232	27	12.64	+	2.14	5.62E-04	1.89E-02
response to red or far red light (GO:0009639)	215	25	11.72	+	2.13	1.00E-03	3.10E-02
carbohydrate derivative metabolic process (GO:1901135)	671	78	36.57	+	2.13	4.43E-09	6.56E-07
cellular nitrogen compound biosynthetic process (GO:0044271)	1211	140	65.99	+	2.12	3.31E-15	1.96E-12
root morphogenesis (GO:0010015)	252	29	13.73	+	2.11	3.73E-04	1.34E-02
drug metabolic process (GO:0017144)	409	47	22.29	+	2.11	8.55E-06	5.05E-04
monocarboxylic acid biosynthetic process (GO:0072330)	210	24	11.44	+	2.10	1.50E-03	4.32E-02
plant organ morphogenesis (GO:1905392)	386	44	21.03	+	2.09	2.19E-05	1.15E-03
leaf development (GO:0048366)	321	36	17.49	+	2.06	1.49E-04	6.11E-03
methylation (GO:0032259)	278	31	15.15	+	2.05	4.12E-04	1.47E-02
anion transport (GO:0006820)	291	32	15.86	+	2.02	5.19E-04	1.77E-02
root development (GO:0048364)	467	51	25.45	+	2.00	1.24E-05	7.12E-04
root system development (GO:0022622)	469	51	25.56	+	2.00	1.31E-05	7.38E-04
response to salt stress (GO:0009651)	590	64	32.15	+	1.99	1.04E-06	8.62E-05
nucleobase-containing small molecule metabolic process (GO:0055086)	363	39	19.78	+	1.97	1.57E-04	6.36E-03
carboxylic acid metabolic process (GO:0019752)	864	92	47.08	+	1.95	1.07E-08	1.40E-06
small molecule metabolic process (GO:0044281)	1504	159	81.96	+	1.94	3.81E-14	1.41E-11
regulation of hormone levels (GO:0010817)	407	43	22.18	+	1.94	1.40E-04	5.83E-03
organic substance biosynthetic process (GO:1901576)	2664	280	145.17	+	1.93	1.27E-24	2.51E-21
biosynthetic process (GO:0009058)	2782	292	151.60	+	1.93	1.01E-25	6.00E-22
cellular biosynthetic process (GO:0044249)	2518	264	137.22	+	1.92	6.13E-23	9.06E-20
defense response to bacterium (GO:0042742)	393	41	21.42	+	1.91	2.59E-04	9.87E-03
response to light stimulus (GO:0009416)	739	77	40.27	+	1.91	3.40E-07	3.29E-05
cofactor metabolic process (GO:0051186)	375	39	20.44	+	1.91	3.02E-04	1.11E-02
aromatic compound biosynthetic process (GO:0019438)	757	78	41.25	+	1.89	4.48E-07	4.08E-05
response to osmotic stress (GO:0006970)	666	68	36.29	+	1.87	3.97E-06	2.58E-04
response to water (GO:0009415)	353	36	19.24	+	1.87	7.35E-04	2.37E-02
response to bacterium (GO:0009617)	493	50	26.87	+	1.86	7.88E-05	3.59E-03
response to radiation (GO:0009314)	760	77	41.42	+	1.86	1.04E-06	8.45E-05
response to water deprivation (GO:0009414)	346	35	18.85	+	1.86	9.94E-04	3.09E-02
response to inorganic substance (GO:0010035)	945	95	51.50	+	1.84	6.79E-08	7.57E-06
response to external biotic stimulus (GO:0043207)	988	99	53.84	+	1.84	4.00E-08	4.92E-06
response to other organism (GO:0051707)	988	99	53.84	+	1.84	4.00E-08	4.82E-06
response to biotic stimulus (GO:0009607)	989	99	53.89	+	1.84	5.61E-08	6.51E-06
response to abiotic stimulus (GO:0009628)	2099	208	114.38	+	1.82	1.53E-15	1.00E-12
organic cyclic compound biosynthetic process (GO:1901362)	871	85	47.46	+	1.79	1.12E-06	8.61E-05
phyllome development (GO:0048827)	475	46	25.88	+	1.78	4.24E-04	1.50E-02
defense response to other organism (GO:0098542)	682	66	37.16	+	1.78	2.45E-05	1.25E-03
macromolecule biosynthetic process (GO:0009059)	1262	122	68.77	+	1.77	7.69E-09	1.11E-06
response to oxidative stress (GO:0006979)	425	41	23.16	+	1.77	9.66E-04	3.06E-02
response to temperature stimulus (GO:0009266)	622	60	33.90	+	1.77	7.01E-05	3.26E-03
plant organ development (GO:0099402)	945	90	51.50	+	1.75	1.39E-06	9.91E-05
response to external stimulus (GO:0009605)	1387	132	75.58	+	1.75	4.07E-09	6.17E-07
shoot system development (GO:0048367)	743	70	40.49	+	1.73	3.58E-05	1.78E-03
cellular macromolecule biosynthetic process (GO:0034645)	1214	112	66.16	+	1.69	3.11E-07	3.17E-05
oxidation-reduction process (GO:0055114)	942	86	51.33	+	1.68	1.08E-05	6.28E-04
response to chemical (GO:0042221)	2776	251	151.28	+	1.66	2.04E-14	8.64E-12
cellular component biogenesis (GO:0044085)	1176	103	64.08	+	1.61	7.57E-06	4.52E-04
multi-organism process (GO:0051704)	1482	129	80.76	+	1.60	7.41E-07	6.36E-05
response to endogenous stimulus (GO:0009719)	1615	140	88.01	+	1.59	2.69E-07	2.79E-05
anatomical structure morphogenesis (GO:0009653)	854	74	46.54	+	1.59	2.11E-04	8.26E-03
ion transport (GO:0006811)	658	57	35.86	+	1.59	1.45E-03	4.22E-02
response to hormone (GO:0009725)	1599	138	87.14	+	1.58	4.27E-07	3.94E-05
transmembrane transport (GO:0055085)	687	59	37.44	+	1.58	1.36E-03	4.07E-02
response to stimulus (GO:0050896)	5729	490	312.20	+	1.57	3.04E-25	8.99E-22
response to acid chemical (GO:0001101)	1178	99	64.19	+	1.54	5.69E-05	2.71E-03
response to stress (GO:0006950)	3157	262	172.04	+	1.52	2.93E-11	5.25E-09
response to organic substance (GO:0010033)	1915	157	104.36	+	1.50	1.17E-06	8.89E-05
response to oxygen-containing compound (GO:1901700)	1595	130	86.92	+	1.50	1.46E-05	8.07E-04
defense response (GO:0006952)	1145	93	62.40	+	1.49	2.95E-04	1.09E-02
cellular nitrogen compound metabolic process (GO:0034641)	2857	226	155.69	+	1.45	5.28E-08	6.25E-06
system development (GO:0048731)	1830	144	99.72	+	1.44	2.41E-05	1.24E-03
cell communication (GO:0007154)	1622	127	88.39	+	1.44	1.15E-04	4.91E-03
regulation of biological quality (GO:0065008)	1131	88	61.63	+	1.43	1.48E-03	4.30E-02
organonitrogen compound metabolic process (GO:1901564)	4219	328	229.91	+	1.43	9.20E-11	1.60E-08
gene expression (GO:0010467)	1523	118	82.99	+	1.42	2.86E-04	1.06E-02
signal transduction (GO:0007165)	1363	104	74.28	+	1.40	1.06E-03	3.25E-02
cellular response to stimulus (GO:0051716)	2332	177	127.08	+	1.39	2.06E-05	1.11E-03
multicellular organismal process (GO:0032501)	2853	216	155.47	+	1.39	2.00E-06	1.40E-04
developmental process (GO:0032502)	3147	238	171.49	+	1.39	5.49E-07	4.85E-05
cellular component organization or biogenesis (GO:0071840)	2836	213	154.55	+	1.38	4.33E-06	2.78E-04
multicellular organism development (GO:0007275)	2613	195	142.39	+	1.37	1.94E-05	1.05E-03
anatomical structure development (GO:0048856)	2965	220	161.57	+	1.36	6.57E-06	4.01E-04
organic cyclic compound metabolic process (GO:1901360)	2599	190	141.63	+	1.34	7.28E-05	3.34E-03
cellular metabolic process (GO:0044237)	7144	520	389.31	+	1.34	4.53E-13	1.16E-10
cellular aromatic compound metabolic process (GO:0006725)	2485	180	135.42	+	1.33	1.94E-04	7.71E-03
metabolic process (GO:0008152)	8180	588	445.76	+	1.32	2.66E-14	1.05E-11
cellular process (GO:0009987)	10275	734	559.93	+	1.31	6.49E-19	5.48E-16
organic substance metabolic process (GO:0071704)	7341	524	400.04	+	1.31	7.65E-12	1.56E-09
nitrogen compound metabolic process (GO:0006807)	5737	388	312.63	+	1.24	6.13E-06	3.78E-04
primary metabolic process (GO:0044238)	6595	429	359.39	+	1.19	6.44E-05	3.02E-03
Unclassified (UNCLASSIFIED)	6353	286	346.20	-	.83	2.81E-04	1.06E-02
protein modification by small protein conjugation or removal (GO:0070647)	487	11	26.54	-	.41	1.42E-03	4.17E-02
modification-dependent protein catabolic process (GO:0019941)	464	8	25.29	-	.32	1.40E-04	5.87E-03
modification-dependent macromolecule catabolic process (GO:0043632)	474	8	25.83	-	.31	1.04E-04	4.56E-03
ubiquitin-dependent protein catabolic process (GO:0006511)	451	5	24.58	-	.20	5.28E-06	3.29E-04
proteasomal protein catabolic process (GO:0010498)	212	2	11.55	-	.17	1.66E-03	4.75E-02
RNA splicing (GO:0008380)	248	2	13.51	-	.15	4.31E-04	1.52E-02

## Sheet: REVIGO WT up
Supplementary Data 1. Lists of differentially expressed genes and the associated over- and under-represented Biological Processes. Raw REVIGO results for over- and under-represented biological processes in up-regulated genes in WT. GO terms with a dispensability < 0.05 are highlighted in yellow.
term_ID	description	frequency	uniqueness	dispensability	representative	eliminated
GO:0006457	protein folding	0.903%	0.958	0.000	6457	0
GO:0009058	biosynthetic process	31.611%	0.971	0.000	9058	0
GO:0009408	response to heat	0.166%	0.611	0.000	9408	0
GO:0010150	leaf senescence	0.006%	0.965	0.000	10150	0
GO:0019953	sexual reproduction	0.275%	0.967	0.000	19953	0
GO:0033036	macromolecule localization	3.030%	0.921	0.000	33036	0
GO:0048518	positive regulation of biological process	1.744%	0.832	0.000	48518	0
GO:0050896	response to stimulus	12.210%	0.984	0.000	50896	0
GO:0065007	biological regulation	20.498%	0.986	0.000	65007	0
GO:0006458	'de novo' protein folding	0.027%	0.925	0.025	6458	0
GO:0051259	protein oligomerization	0.188%	0.938	0.030	51259	0
GO:0006914	autophagy	0.230%	0.961	0.030	6914	0
GO:0034660	ncRNA metabolic process	3.407%	0.856	0.040	34660	0
GO:0009061	anaerobic respiration	0.045%	0.950	0.054	9061	0
GO:0044249	cellular biosynthetic process	30.048%	0.876	0.130	44249	0
GO:0015833	peptide transport	0.298%	0.916	0.295	15833	0
GO:0009628	response to abiotic stimulus	0.571%	0.716	0.319	9628	0
GO:0048522	positive regulation of cellular process	1.585%	0.696	0.323	48522	0
GO:1901700	response to oxygen-containing compound	0.503%	0.618	0.353	1901700	0
GO:0009719	response to endogenous stimulus	0.526%	0.717	0.355	9719	0
GO:0071705	nitrogen compound transport	1.767%	0.923	0.365	71705	0
GO:0008104	protein localization	2.626%	0.879	0.385	8104	0
GO:0043604	amide biosynthetic process	6.374%	0.868	0.398	43604	0
GO:0007005	mitochondrion organization	0.418%	0.936	0.414	7005	0
GO:0071702	organic substance transport	4.980%	0.916	0.423	71702	0
GO:0034470	ncRNA processing	2.222%	0.852	0.429	34470	0
GO:0034976	response to endoplasmic reticulum stress	0.100%	0.679	0.442	34976	0
GO:0050789	regulation of biological process	19.373%	0.785	0.443	50789	0
GO:0006950	response to stress	4.575%	0.664	0.448	6950	0
GO:0043618	regulation of transcription from RNA polymerase II promoter in response to stress	0.026%	0.578	0.450	43618	0
GO:0043620	regulation of DNA-templated transcription in response to stress	0.027%	0.592	0.451	43620	0
GO:0006979	response to oxidative stress	0.575%	0.664	0.509	6979	0
GO:0097305	response to alcohol	0.055%	0.616	0.528	97305	0
GO:0051085	chaperone mediated protein folding requiring cofactor	0.010%	0.922	0.536	51085	0
GO:0009059	macromolecule biosynthetic process	19.548%	0.890	0.556	9059	0
GO:0009723	response to ethylene	0.010%	0.660	0.560	9723	0
GO:0042221	response to chemical	3.071%	0.676	0.562	42221	0
GO:0001101	response to acid chemical	0.124%	0.652	0.563	1101	0
GO:0046677	response to antibiotic	0.128%	0.651	0.565	46677	0
GO:0042254	ribosome biogenesis	1.422%	0.957	0.569	42254	0
GO:1901698	response to nitrogen compound	0.178%	0.644	0.581	1901698	0
GO:0061077	chaperone-mediated protein folding	0.043%	0.924	0.585	61077	0
GO:0044271	cellular nitrogen compound biosynthetic process	22.502%	0.852	0.585	44271	0
GO:0030150	protein import into mitochondrial matrix	0.036%	0.863	0.587	30150	0
GO:0042493	response to drug	0.266%	0.634	0.602	42493	0
GO:0010035	response to inorganic substance	0.317%	0.630	0.611	10035	0
GO:0035967	cellular response to topologically incorrect protein	0.044%	0.580	0.613	35967	0
GO:0035966	response to topologically incorrect protein	0.053%	0.607	0.621	35966	0
GO:0042026	protein refolding	0.069%	0.922	0.621	42026	0
GO:0009644	response to high light intensity	0.005%	0.707	0.631	9644	0
GO:1901576	organic substance biosynthetic process	30.365%	0.900	0.658	1901576	0
GO:0031323	regulation of cellular metabolic process	11.662%	0.715	0.665	31323	0
GO:0019222	regulation of metabolic process	11.942%	0.785	0.669	19222	0
GO:0042542	response to hydrogen peroxide	0.029%	0.626	0.673	42542	0
GO:0009737	response to abscisic acid	0.029%	0.614	0.673	9737	0
GO:0010033	response to organic substance	0.900%	0.602	0.675	10033	0
GO:0033554	cellular response to stress	2.967%	0.601	0.679	33554	0
GO:0009642	response to light intensity	0.011%	0.695	0.679	9642	0
GO:0051716	cellular response to stimulus	9.561%	0.622	0.680	51716	0
GO:0033993	response to lipid	0.226%	0.601	0.687	33993	0
GO:0042886	amide transport	0.337%	0.924	0.689	42886	0
GO:0009636	response to toxic substance	0.833%	0.604	0.711	10033	1
GO:0070887	cellular response to chemical stimulus	1.007%	0.580	0.725	10033	1
GO:0009651	response to salt stress	0.043%	0.648	0.726	9408	1
GO:0010243	response to organonitrogen compound	0.140%	0.606	0.737	33993	1
GO:0010286	heat acclimation	0.005%	0.678	0.753	9408	1
GO:0006970	response to osmotic stress	0.082%	0.634	0.760	9408	1
GO:0050794	regulation of cellular process	18.840%	0.756	0.761	50789	1
GO:0000302	response to reactive oxygen species	0.181%	0.585	0.762	97305	1
GO:0010200	response to chitin	0.004%	0.660	0.762	33993	1
GO:0090693	plant organ senescence	0.006%	0.965	0.766	10150	1
GO:0016072	rRNA metabolic process	0.965%	0.865	0.773	34470	1
GO:0009416	response to light stimulus	0.157%	0.646	0.802	9642	1
GO:0009414	response to water deprivation	0.022%	0.570	0.807	9737	1
GO:0009415	response to water	0.026%	0.578	0.816	9737	1
GO:0009266	response to temperature stimulus	0.213%	0.643	0.818	9408	1
GO:0009787	regulation of abscisic acid-activated signaling pathway	0.005%	0.574	0.827	9737	1
GO:0009314	response to radiation	0.193%	0.646	0.828	9408	1
GO:1901419	regulation of response to alcohol	0.005%	0.593	0.828	9737	1
GO:0048584	positive regulation of response to stimulus	0.461%	0.525	0.835	48522	1
GO:0044703	multi-organism reproductive process	0.335%	0.967	0.841	19953	1
GO:0051252	regulation of RNA metabolic process	10.029%	0.685	0.841	31323	1
GO:0009725	response to hormone	0.335%	0.586	0.851	33993	1
GO:0051171	regulation of nitrogen compound metabolic process	10.926%	0.723	0.858	31323	1
GO:0009409	response to cold	0.039%	0.642	0.862	9408	1
GO:0019219	regulation of nucleobase-containing compound metabolic process	10.258%	0.697	0.862	31323	1
GO:0034605	cellular response to heat	0.041%	0.622	0.865	9408	1
GO:0010628	positive regulation of gene expression	0.653%	0.686	0.867	48522	1
GO:0034613	cellular protein localization	1.546%	0.879	0.868	8104	1
GO:0071310	cellular response to organic substance	0.651%	0.555	0.870	33993	1
GO:0080090	regulation of primary metabolic process	11.675%	0.733	0.871	31323	1
GO:0061408	positive regulation of transcription from RNA polymerase II promoter in response to heat stress	0.003%	0.500	0.886	43618	1
GO:0045893	positive regulation of transcription, DNA-templated	0.519%	0.651	0.888	48522	1
GO:0051084	'de novo' posttranslational protein folding	0.011%	0.921	0.897	51085	1
GO:0015031	protein transport	2.251%	0.872	0.912	8104	1
GO:0009893	positive regulation of metabolic process	1.048%	0.703	0.914	48522	1
GO:0070727	cellular macromolecule localization	1.561%	0.881	0.915	8104	1
GO:0031325	positive regulation of cellular metabolic process	1.004%	0.672	0.936	48522	1
GO:0051173	positive regulation of nitrogen compound metabolic process	0.685%	0.686	0.941	48522	1
GO:0045184	establishment of protein localization	2.407%	0.877	0.943	8104	1
GO:0036003	positive regulation of transcription from RNA polymerase II promoter in response to stress	0.012%	0.528	0.950	43618	1
GO:0034620	cellular response to unfolded protein	0.029%	0.589	0.950	35967	1
GO:0045935	positive regulation of nucleobase-containing compound metabolic process	0.600%	0.667	0.954	48522	1
GO:0010557	positive regulation of macromolecule biosynthetic process	0.633%	0.671	0.962	48522	1
GO:0006986	response to unfolded protein	0.037%	0.600	0.965	35967	1
GO:0030968	endoplasmic reticulum unfolded protein response	0.027%	0.528	0.967	35967	1
GO:0051254	positive regulation of RNA metabolic process	0.535%	0.661	0.969	48522	1
GO:0010604	positive regulation of macromolecule metabolic process	0.988%	0.679	0.979	48522	1
GO:1902680	positive regulation of RNA biosynthetic process	0.521%	0.651	0.989	48522	1
GO:1903508	positive regulation of nucleic acid-templated transcription	0.519%	0.651	0.994	48522	1

[truncated: 7 more sheets: REVIGO WT down, REVIGO mutant up, REVIGO mutant down, Selected WT up, Selected WT down, Selected mutant up, Selected mutant down]
